# Supplementary material for: SpeciesPrimer: a bioinformatics pipeline dedicated to the design of qPCR primers for the quantification of bacterial species
Source: PeerJ. 2020 Feb 18;8:e8544. doi: 10.7717/peerj.8544 (PMC7034379; doi:10.7717/peerj.8544)
Supplement: Dataset S1 — Dataset content: Input genome assembly accessions, Pipeline configuration, Species list [file peerj-08-8544-s001.xlsx]

## Sheet: Input genome assemblies
Enterococcus faecalis assembly accession	Enterococcus faecium assembly accession	Pediococcus acidilactici assembly accession /FAM number	assembly accession /FAM number	Test case 1 (Enterococcus faecium) assembly accessions	Test case 2 (Pediococcus acidilactici) assembly accession /FAM number		Legend
GCF_000393635.1	GCF_900178755.1	GCF_000146325.1	GCF_000014505.1	GCF_000415325.2	GCF_000146325.1		Genome assembly with wrong taxonomy (Enterococcus faecalis)
GCF_000395075.1	GCF_900178835.1	GCF_000163095.1	GCF_000285875.1	GCF_900178755.1	GCF_000163095.1		Genome assembly omitted in test case 2
GCF_001055135.1	GCF_900178625.1	GCF_000380265.1	GCF_000496265.1	GCF_900178835.1	GCF_000380265.1
GCF_000205205.1	GCF_000395485.1	GCF_001437115.1	GCF_000708635.1	GCF_900178625.1	GCF_001437115.1
GCF_000391085.1	GCF_001543825.1	GCF_001767275.1	GCF_001411765.2	GCF_000395485.1	GCF_001767275.1
GCF_000717435.1	GCF_003320475.1	GCF_001922325.1	GCF_001437285.1	GCF_001543825.1	GCF_001922325.1
GCF_000415085.1	GCF_900180325.1	GCF_002173575.1	GCF_001593095.1	GCF_003320475.1	GCF_002173575.1
GCF_000163795.1	GCF_003320655.1	GCF_002173595.1	GCF_001748065.1	GCF_900180325.1	GCF_002173595.1
GCF_001056625.1	GCF_900180165.1	GCF_002174215.1	GCF_002173535.1	GCF_003320655.1	GCF_002174215.1
GCF_000148105.1	GCF_900178715.1	FAM13473	GCF_002202155.1	GCF_900180165.1	FAM13473
GCF_000159655.1	GCF_000322465.1	FAM13875	GCF_002724015.1	GCF_900178715.1	FAM13875
GCF_000396665.1	GCF_003320495.1	FAM13875p	GCF_002982155.1	GCF_000322465.1	FAM13875p
GCF_000407045.1	GCF_000391805.1	FAM13877	GCF_003429405.1	GCF_003320495.1	FAM13877
GCF_000393475.1	GCF_002158285.1	FAM13881	GCF_900454755.1	GCF_000391805.1	FAM13881
GCF_000393555.1	GCF_900179445.1	FAM1430	FAM13073	GCF_002158285.1	FAM1430
GCF_000148005.1	GCF_000295395.2	FAM17411	FAM17622	GCF_900179445.1	FAM17411
GCF_000391465.1	GCF_002141195.1	FAM17418	FAM18321	GCF_000295395.2	FAM17418
GCF_000393035.1	GCF_001953255.1	FAM17419c1	FAM18327	GCF_002141195.1	FAM17419c1
GCF_000294265.2	GCF_000395705.1	FAM17419c2	FAM18813	GCF_001953255.1	FAM17419c2
GCF_001055475.1	GCF_002997315.1	FAM17419c2i0	FAM19080	GCF_000395705.1	FAM17419c2i0
GCF_000788175.1	GCF_002562865.1	FAM17419c4	FAM19083	GCF_002997315.1	FAM17419c4
GCF_000519725.1	GCF_000295275.2	FAM17420c1	FAM19086	GCF_002562865.1	FAM17420c1
GCF_000392855.1	GCF_002848725.1	FAM17420c1i0	FAM19132	GCF_000295275.2	FAM17420c1i0
GCF_001055055.1	GCF_900179335.1	FAM17420c2	FAM19132p	GCF_002848725.1	FAM17420c2
GCF_000395115.1	GCF_003319985.1	FAM17422	FAM19144	GCF_900179335.1	FAM17422
GCF_001053015.1	GCF_000396885.1	FAM17644	FAM19169	GCF_003319985.1	FAM17644
GCF_000394175.1	GCF_900180185.1	FAM17644i0	FAM20650	GCF_000396885.1	FAM17644i0
GCF_002220885.1	GCF_900148565.1	FAM17656		GCF_900180185.1	FAM17656
GCF_000147475.1	GCF_000396825.1	FAM17656i0		GCF_900148565.1	FAM17656i0
GCF_000395095.1	GCF_002141335.1	FAM17708		GCF_000396825.1	FAM17708
GCF_000519605.1	GCF_900179055.1	FAM17708i0		GCF_002141335.1	FAM17708i0
GCF_000148245.1	GCF_002140955.1	FAM18098		GCF_900179055.1	FAM18098
GCF_000396425.1	GCF_900178555.1	FAM18098p		GCF_002140955.1	FAM18098p
GCF_000392875.1	GCF_003320555.1	FAM18964		GCF_900178555.1	FAM18964
GCF_000394995.1	GCF_900143475.1	FAM18969		GCF_003320555.1	FAM18969
GCF_000393175.1	GCF_000395685.1	FAM18986		GCF_900143475.1	FAM18986
GCF_000393535.1	GCF_003320325.1	FAM18987		GCF_000395685.1	FAM18988
GCF_000294245.2	GCF_000392105.1	FAM18988		GCF_003320325.1	FAM19071
GCF_000395015.1	GCF_900178685.1	FAM19071		GCF_000392105.1	FAM19133
GCF_001886675.1	GCF_000294935.2	FAM19133		GCF_900178685.1	FAM19134
GCF_000393015.1	GCF_001543585.1	FAM19134		GCF_000294935.2	FAM19135
GCF_000148445.1	GCF_900179625.1	FAM19135		GCF_001543585.1	FAM19136
GCF_000147925.1	GCF_900179325.1	FAM19136		GCF_900179625.1	FAM19137
GCF_000788155.1	GCF_900178665.1	FAM19137		GCF_900179325.1	FAM19138
GCF_000147295.1	GCF_001587115.1	FAM19138		GCF_900178665.1	FAM19139
GCF_000390745.1	GCF_900179235.1	FAM19139		GCF_001587115.1	FAM19140
GCF_000394815.1	GCF_000396945.1	FAM19140		GCF_900179235.1	FAM19141
GCF_000394875.1	GCF_900179835.1	FAM19141		GCF_000396945.1	FAM19142
GCF_000390505.1	GCF_900179545.1	FAM19142		GCF_900179835.1	FAM19148
GCF_001878735.1	GCF_900179905.1	FAM19148		GCF_900179545.1	FAM19149
GCF_000508705.1	GCF_900180295.1	FAM19149		GCF_900179905.1	FAM19150
GCF_001058065.1	GCF_000395865.1	FAM19150		GCF_900180295.1	FAM19151
GCF_000394235.1	GCF_900143345.1	FAM19151		GCF_000395865.1	FAM19152
GCF_000393095.1	GCF_000394715.1	FAM19152		GCF_900143345.1	FAM19153
GCF_000148305.1	GCF_002140865.1	FAM19153		GCF_000394715.1	FAM19154
GCF_000415465.2	GCF_900180125.1	FAM19154		GCF_002140865.1	FAM19155
GCF_001931845.1	GCF_000394435.1	FAM19155		GCF_900180125.1	FAM19156
GCF_000396065.1	GCF_000294815.2	FAM19156		GCF_000394435.1	FAM19157
GCF_000148225.1	GCF_900178955.1	FAM19157		GCF_000294815.2	FAM19158
GCF_000393395.1	GCF_002141355.1	FAM19158		GCF_900178955.1	FAM19159
GCF_000519825.1	GCF_900178745.1	FAM19159		GCF_002141355.1	FAM19160
GCF_000390965.1	GCF_001721085.1	FAM19160		GCF_900178745.1	FAM19180
GCF_000396005.1	GCF_900178705.1	FAM19180		GCF_001721085.1	FAM19324
GCF_000519545.1	GCF_000394635.1	FAM19324		GCF_900178705.1	FAM19390
GCF_000157175.1	GCF_001543575.1	FAM19390		GCF_000394635.1	FAM19393
GCF_000391145.1	GCF_900178775.1	FAM19393		GCF_001543575.1	FAM19460
GCF_000394195.1	GCF_000295335.2	FAM19460		GCF_900178775.1	FAM19461
GCF_000211255.1	GCF_002777275.1	FAM19461		GCF_000295335.2	FAM19462
GCF_000394275.1	GCF_900178945.1	FAM19462		GCF_002777275.1	FAM19464
GCF_001053375.1	GCF_002630985.1	FAM19464		GCF_900178945.1	FAM19466
GCF_000394315.1	GCF_000294835.2	FAM19466		GCF_002630985.1	FAM19475
GCF_001056125.1	GCF_001996345.1	FAM19475		GCF_000294835.2	FAM19476
GCF_000396985.1	GCF_003320245.1	FAM19476		GCF_001996345.1	FAM19488
GCF_000147555.1	GCF_000322165.1	FAM19488		GCF_003320245.1	FAM19500
GCF_000393795.1	GCF_002141255.1	FAM19500		GCF_000322165.1	FAM19598
GCF_000391165.1	GCF_900178905.1	FAM19598		GCF_002141255.1	FAM19612
GCF_001054535.1	GCF_002158275.1	FAM19612		GCF_900178905.1	FAM19614
GCF_001057435.1	GCF_000395565.1	FAM19614		GCF_002158275.1	FAM19619
GCF_000393715.1	GCF_900179075.1	FAM19619		GCF_000395565.1	FAM19641
GCF_000157155.1	GCF_000393435.1	FAM19641		GCF_900179075.1	FAM19651
GCF_000394915.1	GCF_000393675.1	FAM19651		GCF_000393435.1	FAM19701
GCF_000519785.1	GCF_002442315.1	FAM19701		GCF_000393675.1	FAM19852
GCF_000394455.1	GCF_900180205.1	FAM19852		GCF_002442315.1	FAM19879
GCF_002140335.1	GCF_000321705.1	FAM19879		GCF_900180205.1	FAM19882
GCF_900143365.1	GCF_003320165.1	FAM19882		GCF_000321705.1	FAM19953
GCF_001055935.1	GCF_001543565.1	FAM19953		GCF_003320165.1	FAM19955
GCF_000396165.1	GCF_003320365.1	FAM19955		GCF_001543565.1	FAM20059
GCF_000157375.1	GCF_900179185.1	FAM20059		GCF_003320365.1	FAM20072
GCF_000157495.1	GCF_001990575.1	FAM20072		GCF_900179185.1	FAM20284
GCF_000159275.1	GCF_900179405.1	FAM20284		GCF_001990575.1	FAM20293
GCF_000391305.1	GCF_000295355.2	FAM20293		GCF_900179405.1	FAM20301
GCF_001594365.1	GCF_000322385.1	FAM20301		GCF_000295355.2	FAM20303
GCF_000395175.1	GCF_003320075.1	FAM20303		GCF_000322385.1	FAM20310
GCF_000391345.1	GCF_900179475.1	FAM20310		GCF_003320075.1	FAM20325
GCF_000147495.1	GCF_900178805.1	FAM20325		GCF_900179475.1	FAM20497
GCF_000394795.1	GCF_002562875.1	FAM20497		GCF_900178805.1	FAM20621
GCF_000294145.2	GCF_000322005.1	FAM20621		GCF_002562875.1	FAM20547
GCF_001989555.1	GCF_000394535.1	FAM20547		GCF_000322005.1	FAM20547i0
GCF_000392775.1	GCF_003020705.1	FAM20547i0		GCF_000394535.1	FAM20551
GCF_000519905.1	GCF_003320505.1	FAM20551		GCF_003020705.1	FAM20552
GCF_000147215.1	GCF_000391825.1	FAM20552		GCF_003320505.1	FAM20553
GCF_002861295.1	GCF_900143385.1	FAM20553		GCF_000391825.1	FAM20555
GCF_000394375.1	GCF_900180245.1	FAM20555		GCF_900143385.1	FAM20556
GCF_000390685.1	GCF_000395925.1	FAM20556		GCF_900180245.1	FAM20557
GCF_000393235.1	GCF_900178995.1	FAM20557		GCF_000395925.1	FAM20557i0
GCF_000172575.2	GCF_002025045.1	FAM20557i0		GCF_900178995.1	FAM20559
GCF_900205805.1	GCF_900179615.1	FAM20559		GCF_002025045.1	FAM20559i0
GCF_001598635.1	GCF_002909305.1	FAM20559i0		GCF_900179615.1	FAM20560
GCF_000396565.1	GCF_900180035.1	FAM20560		GCF_002909305.1	FAM20561
GCF_000415005.1	GCF_000396685.1	FAM20561		GCF_900180035.1	FAM20562
GCF_000396605.1	GCF_000397045.1	FAM20562		GCF_000396685.1	FAM20579
GCF_000163815.1	GCF_000321545.1	FAM20579		GCF_000397045.1	FAM20580
GCF_002141395.1	GCF_900179775.1	FAM20580		GCF_000321545.1	FAM20620
GCF_000281195.1	GCF_000322305.1	FAM20620		GCF_900179775.1	FAM20622
GCF_001055725.1	GCF_002442445.1	FAM20622		GCF_000322305.1	FAM20623
GCF_001054585.1	GCF_000321605.1	FAM20623		GCF_002442445.1	FAM20624
GCF_000396225.1	GCF_002141115.1	FAM20624		GCF_000321605.1	FAM20624i0
GCF_001053475.1	GCF_900179795.1	FAM20624i0		GCF_002141115.1	FAM22132
GCF_000391205.1	GCF_000321485.1	FAM22132		GCF_900179795.1	FAM22234
GCF_000147575.1	GCF_000411035.1	FAM22234		GCF_000321485.1	FAM22235
GCF_000294305.2	GCF_000392045.1	FAM22235		GCF_000411035.1	FAM22257
GCF_000415225.1	GCF_900179045.1	FAM22257		GCF_000392045.1	FAM22258
GCF_001052275.1	GCF_001543735.1	FAM22258		GCF_900179045.1	FAM22259
GCF_000390845.1	GCF_000390485.1	FAM22259		GCF_001543735.1	FAM22260
GCF_000392675.1	GCF_003320575.1	FAM22260		GCF_000390485.1	FAM22261
GCF_000148045.1	GCF_002140735.1	FAM22261		GCF_003320575.1	FAM22262
GCF_900205785.1	GCF_000392005.1	FAM22262		GCF_002140735.1
GCF_000396345.1	GCF_900179265.1			GCF_000392005.1
GCF_001055025.1	GCF_000295135.2			GCF_900179265.1
GCF_000415125.1	GCF_002973715.1			GCF_000295135.2
GCF_000395305.1	GCF_003320115.1			GCF_002973715.1
GCF_001057765.1	GCF_001543795.1			GCF_003320115.1
GCF_000396305.1	GCF_002140535.1			GCF_001543795.1
GCF_000393495.1	GCF_002761275.1			GCF_002140535.1
GCF_000390925.1	GCF_900179695.1			GCF_002761275.1
GCF_000390885.1	GCF_900179455.1			GCF_900179695.1
GCF_000294005.2	GCF_000392025.1			GCF_900179455.1
GCF_000395265.1	GCF_000322365.1			GCF_000392025.1
GCF_000396445.1	GCF_900178575.1			GCF_000322365.1
GCF_000160155.1	GCF_000322045.1			GCF_900178575.1
GCF_000394935.1	GCF_002158365.1			GCF_000322045.1
GCF_000390945.1	GCF_002141035.1			GCF_002158365.1
GCF_002140345.1	GCF_900179585.1			GCF_002141035.1
GCF_001055675.1	GCF_900179885.1			GCF_900179585.1
GCF_002355755.1	GCF_000321725.1			GCF_900179885.1
GCF_001053515.1	GCF_002880635.1			GCF_000321725.1
GCF_000393515.1	GCF_000295555.2			GCF_002880635.1
GCF_000396485.1	GCF_000394755.1			GCF_000295555.2
GCF_002141415.1	GCF_000321525.1			GCF_000394755.1
GCF_000519525.1	GCF_000322345.1			GCF_000321525.1
GCF_001054775.1	GCF_000392315.1			GCF_000322345.1
GCF_000519505.1	GCF_003320275.1			GCF_000392315.1
GCF_001056555.1	GCF_900178795.1			GCF_003320275.1
GCF_000294165.2	GCF_900179555.1			GCF_900178795.1
GCF_000390665.1	GCF_001721905.1			GCF_900179555.1
GCF_000391325.1	GCF_003320795.1			GCF_001721905.1
GCF_000394955.1	GCF_000174395.2			GCF_003320795.1
GCF_000391285.1	GCF_003319975.1			GCF_000174395.2
GCF_000393595.1	GCF_001543555.1			GCF_003319975.1
GCF_000157315.1	GCF_000322145.1			GCF_001543555.1
GCF_000396285.1	GCF_900179635.1			GCF_000322145.1
GCF_000157455.1	GCF_000322085.1			GCF_900179635.1
GCF_000394895.1	GCF_001696305.1			GCF_000322085.1
GCF_000395135.1	GCF_900179095.1			GCF_001696305.1
GCF_000396145.1	GCF_900179645.1			GCF_900179095.1
GCF_000393575.1	GCF_900179605.1			GCF_900179645.1
GCF_000479085.1	GCF_900178965.1			GCF_900179605.1
GCF_000396385.1	GCF_001720945.1			GCF_900178965.1
GCF_000390985.1	GCF_000250945.1			GCF_001720945.1
GCF_000148185.1	GCF_900148705.1			GCF_000250945.1
GCF_000396625.1	GCF_002761255.1			GCF_900148705.1
GCF_000396205.1	GCF_000395525.1			GCF_002761255.1
GCF_000147595.1	GCF_900179845.1			GCF_000395525.1
GCF_000391665.1	GCF_000397005.1			GCF_900179845.1
GCF_000415445.2	GCF_900180235.1			GCF_000397005.1
GCF_000479105.1	GCF_900179595.1			GCF_900180235.1
GCF_000415425.2	GCF_000391785.1			GCF_900179595.1
GCF_000391645.1	GCF_001635875.1			GCF_000391785.1
GCF_000391005.1	GCF_000294995.2			GCF_001635875.1
GCF_000394255.1	GCF_003320455.1			GCF_000294995.2
GCF_000157475.1	GCF_002025065.1			GCF_003320455.1
GCF_001054785.1	GCF_003320135.1			GCF_002025065.1
GCF_000396585.1	GCF_003320665.1			GCF_003320135.1
GCF_000396105.1	GCF_900179245.1			GCF_003320665.1
GCF_000415405.1	GCF_900179375.1			GCF_900179245.1
GCF_001057625.1	GCF_000394735.1			GCF_900179375.1
GCF_000391225.1	GCF_002140435.1			GCF_000394735.1
GCF_000519925.1	GCF_000322425.1			GCF_002140435.1
GCF_000519685.1	GCF_900148595.1			GCF_000322425.1
GCF_000391525.1	GCF_000394675.1			GCF_900148595.1
GCF_002140985.1	GCF_000321585.1			GCF_000394675.1
GCF_001056735.1	GCF_900179765.1			GCF_000321585.1
GCF_000394095.1	GCF_003269465.1			GCF_900179765.1
GCF_000391565.1	GCF_002140595.1			GCF_003269465.1
GCF_000392835.1	GCF_900179065.1			GCF_002140595.1
GCF_000391405.1	GCF_001298485.1			GCF_900179065.1
GCF_000392935.1	GCF_900143355.1			GCF_001298485.1
GCF_000690925.1	GCF_002141135.1			GCF_900143355.1
GCF_000395405.1	GCF_000321965.1			GCF_002141135.1
GCF_000396245.1	GCF_000295155.2			GCF_000321965.1
GCF_000393455.1	GCF_000322205.1			GCF_000295155.2
GCF_000519485.1	GCF_002158355.1			GCF_000322205.1
GCF_000294125.1	GCF_900179365.1			GCF_002158355.1
GCF_000390585.1	GCF_900066025.1			GCF_900179365.1
GCF_000390805.1	GCF_002141175.1			GCF_900066025.1
GCF_000394335.1	GCF_900178875.1			GCF_002141175.1
GCF_000393315.1	GCF_002140255.1			GCF_900178875.1
GCF_002163735.1	GCF_000322065.1			GCF_002140255.1
GCF_000395055.1	GCF_002630975.1			GCF_000322065.1
GCF_000394355.1	GCF_001990615.1			GCF_002630975.1
GCF_000393075.1	GCF_900179225.1			GCF_001990615.1
GCF_000392895.1	GCF_003320405.1			GCF_900179225.1
GCF_000394075.1	GCF_000321925.1			GCF_003320405.1
GCF_000395245.1	GCF_000407345.1			GCF_000321925.1
GCF_000148065.1	GCF_002140555.1			GCF_000407345.1
GCF_000519565.1	GCF_000415305.1			GCF_002140555.1
GCF_000393215.1	GCF_000336405.1			GCF_000415305.1
GCF_000396365.1	GCF_000396705.1			GCF_000336405.1
GCF_000393335.1	GCF_000396845.1			GCF_000396705.1
GCF_000147515.1	GCF_900044005.1			GCF_000396845.1
GCF_000394395.1	GCF_900180465.1			GCF_900044005.1
GCF_000519705.1	GCF_000295455.2			GCF_900180465.1
GCF_000519665.1	GCF_002140475.1			GCF_000295455.2
GCF_000393615.1	GCF_900178985.1			GCF_002140475.1
GCF_000415245.2	GCF_000322325.1			GCF_900178985.1
GCF_001057145.1	GCF_002140375.1			GCF_000322325.1
GCF_001689055.2	GCF_900148725.1			GCF_002140375.1
GCF_000391025.1	GCF_900092475.1			GCF_900148725.1
GCF_000519965.1	GCF_000321945.1			GCF_900092475.1
GCF_000392755.1	GCF_900143405.1			GCF_000321945.1
GCF_000148085.1	GCF_000322245.1			GCF_900143405.1
GCF_000390825.1	GCF_900179155.1			GCF_000322245.1
GCF_000007785.1	GCF_000395545.1			GCF_900179155.1
GCF_000391485.1	GCF_000394415.1			GCF_000395545.1
GCF_002221625.2	GCF_900179755.1			GCF_000394415.1
GCF_000393355.1	GCF_000295515.2			GCF_900179755.1
GCF_000148125.1	GCF_003071445.1			GCF_000295515.2
GCF_002141205.1	GCF_003320695.1			GCF_003071445.1
GCF_000396865.1	GCF_000295615.2			GCF_003320695.1
GCF_000393275.1	GCF_900179855.1			GCF_000295615.2
GCF_000396645.1	GCF_000393775.1			GCF_900179855.1
GCF_900148545.1	GCF_000407105.1			GCF_000393775.1
GCF_000519845.1	GCF_002140315.1			GCF_000407105.1
GCF_000396265.1	GCF_002140455.1			GCF_002140315.1
GCF_000396325.1	GCF_000392165.1			GCF_002140455.1
GCF_000393155.1	GCF_900178595.1			GCF_000392165.1
GCF_000391045.1	GCF_900148525.1			GCF_900178595.1
GCF_000390525.1	GCF_001895905.1			GCF_900148525.1
GCF_000391425.1	GCF_000415285.2			GCF_001895905.1
GCF_001639005.2	GCF_003320815.1			GCF_000415285.2
GCF_000391385.1	GCF_000395745.1			GCF_003320815.1
GCF_000394135.1	GCF_002216245.1			GCF_000395745.1
GCF_000394775.1	GCF_000321805.1			GCF_002216245.1
GCF_001055955.1	GCF_900143375.1			GCF_000321805.1
GCF_000396085.1	GCF_002158435.1			GCF_900143375.1
GCF_000390705.1	GCF_000321665.1			GCF_002158435.1
GCF_000391105.1	GCF_000396745.1			GCF_000321665.1
GCF_000294085.2	GCF_900178735.1			GCF_000396745.1
GCF_000393255.1	GCF_003320055.1			GCF_900178735.1
GCF_001053455.1	GCF_900179415.1			GCF_003320055.1
GCF_000157135.1	GCF_000393695.1			GCF_900179415.1
GCF_000395385.1	GCF_000396785.1			GCF_000393695.1
GCF_000390865.1	GCF_001750885.1			GCF_000396785.1
GCF_000294285.2	GCF_002174445.1			GCF_001750885.1
GCF_000157415.1	GCF_000262105.1			GCF_002174445.1
GCF_000788235.1	GCF_000321985.1			GCF_000262105.1
GCF_000147535.1	GCF_900178935.1			GCF_000321985.1
GCF_000391705.1	GCF_900179725.1			GCF_900178935.1
GCF_900205855.1	GCF_000322265.1			GCF_900179725.1
GCF_000391445.1	GCF_002973675.1			GCF_000322265.1
GCF_000294025.2	GCF_900179385.1			GCF_002973675.1
GCF_000395285.1	GCF_900179105.1			GCF_900179385.1
GCF_002110405.1	GCF_900180115.1			GCF_900179105.1
GCF_000147255.1	GCF_000295415.2			GCF_900180115.1
GCF_000148165.1	GCF_900179255.1			GCF_000295415.2
GCF_000414985.1	GCF_002997345.1			GCF_900179255.1
GCF_000390725.1	GCF_000294895.2			GCF_002997345.1
GCF_000392955.1	GCF_900178785.1			GCF_000294895.2
GCF_000391185.1	GCF_000322405.1			GCF_900178785.1
GCF_002006705.1	GCF_900180195.1			GCF_000322405.1
GCF_000391545.1	GCF_000295575.2			GCF_900180195.1
GCF_000147985.1	GCF_900180175.1			GCF_000295575.2
GCF_000396405.1	GCF_000295375.2			GCF_900180175.1
GCF_000390545.1	GCF_001543675.1			GCF_000295375.2
GCF_000396185.1	GCF_900179925.1			GCF_001543675.1
GCF_000391365.1	GCF_900178645.1			GCF_900179925.1
GCF_000148205.1	GCF_900179785.1			GCF_900178645.1
GCF_001057835.1	GCF_003020725.1			GCF_900179785.1
GCF_000519585.1	GCF_900179575.1			GCF_003020725.1
GCF_000394835.1	GCF_002442475.1			GCF_900179575.1
GCF_000396125.1	GCF_000395785.1			GCF_002442475.1
GCF_000395365.1	GCF_900179215.1			GCF_000395785.1
GCF_002140075.1	GCF_000395765.1			GCF_900179215.1
GCF_000393055.1	GCF_000322445.1			GCF_000395765.1
GCF_000391725.1	GCF_900178855.1			GCF_000322445.1
GCF_000390765.1	GCF_900180025.1			GCF_900178855.1
GCF_000161875.1	GCF_900179535.1			GCF_900180025.1
GCF_001054705.1	GCF_001886635.1			GCF_900179535.1
GCF_000788165.1	GCF_002006745.1			GCF_001886635.1
GCF_001055875.1	GCF_001543665.1			GCF_002006745.1
GCF_000519465.1	GCF_900179195.1			GCF_001543665.1
GCF_000519445.1	GCF_000295075.2			GCF_900179195.1
GCF_000390645.1	GCF_000397025.1			GCF_000295075.2
GCF_000519865.1	GCF_003320355.1			GCF_000397025.1
GCF_001055395.1	GCF_000411015.1			GCF_003320355.1
GCF_000393295.1	GCF_000415265.2			GCF_000411015.1
GCF_000415105.1	GCF_001720965.1			GCF_000415265.2
GCF_000393195.1	GCF_001622975.1			GCF_001720965.1
GCF_000390565.1	GCF_003020765.1			GCF_001622975.1
GCF_000294205.2	GCF_000321845.1			GCF_003020765.1
GCF_001057475.1	GCF_002848625.1			GCF_000321845.1
GCF_000390905.1	GCF_000295255.2			GCF_002848625.1
GCF_000519805.1	GCF_900179395.1			GCF_000295255.2
GCF_000394515.1	GCF_000390465.1			GCF_900179395.1
GCF_000519645.1	GCF_001543745.1			GCF_000390465.1
GCF_002814115.1	GCF_900179565.1			GCF_001543745.1
GCF_001692705.1	GCF_003020685.1			GCF_900179565.1
GCF_000294225.2	GCF_003320415.1			GCF_003020685.1
GCF_000391625.1	GCF_000392125.1			GCF_003320415.1
GCF_000391605.1	GCF_000294875.2			GCF_000392125.1
GCF_000395205.1	GCF_000415365.1			GCF_000294875.2
GCF_000294185.2	GCF_900179675.1			GCF_000415365.1
GCF_000391505.1	GCF_001543765.1			GCF_900179675.1
GCF_000396545.1	GCF_000321625.1			GCF_001543765.1
GCF_000391685.1	GCF_001543645.1			GCF_000321625.1
GCF_000394215.1	GCF_002442955.1			GCF_001543645.1
GCF_000519765.1	GCF_000321885.1			GCF_002442955.1
GCF_000519885.1	GCF_001990565.1			GCF_000321885.1
GCF_000147455.1	GCF_003320715.1			GCF_001990565.1
GCF_000157275.1	GCF_002562815.1			GCF_003320715.1
GCF_000788185.1	GCF_900178675.1			GCF_002562815.1
GCF_000294325.2	GCF_002562805.1			GCF_900178675.1
GCF_000157335.1	GCF_900178565.1			GCF_002562805.1
GCF_000396465.1	GCF_000321505.1			GCF_900178565.1
GCF_000395035.1	GCF_002007625.1			GCF_000321505.1
GCF_000294065.2	GCF_000395885.1			GCF_002007625.1
GCF_000479065.1	GCF_001721025.1			GCF_000395885.1
GCF_000392975.1	GCF_001720985.1			GCF_001721025.1
GCF_000392915.1	GCF_900178695.1			GCF_001720985.1
GCF_000293985.2	GCF_000322105.1			GCF_900178695.1
GCF_000392795.1	GCF_003320595.1			GCF_000322105.1
GCF_000519425.1	GCF_900148665.1			GCF_003320595.1
GCF_000395985.1	GCF_000321745.1			GCF_900148665.1
GCF_001563075.1	GCF_900179945.1			GCF_000321745.1
GCF_000519625.1	GCF_002158295.1			GCF_900179945.1
GCF_000396045.1	GCF_000321565.1			GCF_002158295.1
GCF_000396025.1	GCF_000395725.1			GCF_000321565.1
GCF_000396505.1	GCF_900180145.1			GCF_000395725.1
GCF_000393115.1	GCF_900179715.1			GCF_900180145.1
GCF_000294045.1	GCF_002442275.1			GCF_900179715.1
GCF_001056075.1	GCF_900179915.1			GCF_002442275.1
GCF_000390785.1	GCF_003320775.1			GCF_900179915.1
GCF_000391265.1	GCF_000295435.2			GCF_003320775.1
GCF_000391245.1	GCF_000313195.1			GCF_000295435.2
GCF_000317915.1	GCF_900179285.1			GCF_000313195.1
GCF_000393135.1	GCF_003320315.1			GCF_900179285.1
GCF_000147275.1	GCF_002894565.1			GCF_003320315.1
GCF_000407305.1	GCF_900179505.1			GCF_002894565.1
GCF_000391065.1	GCF_002848665.1			GCF_900179505.1
GCF_000157235.1	GCF_000295595.2			GCF_002848665.1
GCF_000394155.1	GCF_000391745.1			GCF_000295595.2
GCF_000519745.1	GCF_900180045.1			GCF_000391745.1
GCF_000394115.1	GCF_003320155.1			GCF_900180045.1
GCF_000394295.1	GCF_900179485.1			GCF_003320155.1
GCF_000392995.1	GCF_000295175.2			GCF_900179485.1
GCF_002140925.1	GCF_003071425.1			GCF_000295175.2
GCF_000391585.1	GCF_000295315.2			GCF_003071425.1
GCF_000415065.1	GCF_000393755.1			GCF_000295315.2
GCF_000415045.1	GCF_002024245.1			GCF_000393755.1
GCF_000148265.1	GCF_900179895.1			GCF_002024245.1
GCF_000392815.1	GCF_900179125.1			GCF_900179895.1
GCF_000415205.1	GCF_002334625.1			GCF_900179125.1
GCF_000393375.1	GCF_002848385.1			GCF_002334625.1
GCF_900205835.1	GCF_900179115.1			GCF_002848385.1
GCF_000394855.1	GCF_002158325.1			GCF_900179115.1
GCF_000396905.1	GCF_000321825.1			GCF_002158325.1
GCF_000391125.1	GCF_900179935.1			GCF_000321825.1
GCF_002110435.1	GCF_000415345.1			GCF_900179935.1
GCF_000519945.1	GCF_003320395.1			GCF_000415345.1
GCF_001055435.1	GCF_002140415.1			GCF_003320395.1
GCF_000157515.1	GCF_000395845.1			GCF_002140415.1
GCF_000394975.1	GCF_900180155.1			GCF_000395845.1
GCF_000159255.1	GCF_001721105.1			GCF_900180155.1
GCF_000742975.1	GCF_900180015.1			GCF_001721105.1
GCF_000294105.2	GCF_900178585.1			GCF_900180015.1
GCF_000788255.1	GCF_900179525.1			GCF_900178585.1
GCF_002088065.1	GCF_000313155.1			GCF_900179525.1
GCF_000396525.1	GCF_000392195.1			GCF_000313155.1
GCF_000415025.1	GCF_000394555.1			GCF_000392195.1
GCF_000550745.1	GCF_003320855.1			GCF_000394555.1
	GCF_001542895.1			GCF_003320855.1
	GCF_900179735.1			GCF_001542895.1
	GCF_900179435.1			GCF_900179735.1
	GCF_001953235.1			GCF_900179435.1
	GCF_001990605.1			GCF_001953235.1
	GCF_000395625.1			GCF_001990605.1
	GCF_900180275.1			GCF_000395625.1
	GCF_002141005.1			GCF_900180275.1
	GCF_001546375.1			GCF_002141005.1
	GCF_900179965.1			GCF_001546375.1
	GCF_000395465.1			GCF_900179965.1
	GCF_002973685.1			GCF_000395465.1
	GCF_000258325.1			GCF_002973685.1
	GCF_002158385.1			GCF_000258325.1
	GCF_000392145.1			GCF_002158385.1
	GCF_002141125.1			GCF_000392145.1
	GCF_000321865.1			GCF_002141125.1
	GCF_000393735.1			GCF_000321865.1
	GCF_900178765.1			GCF_000393735.1
	GCF_000391885.1			GCF_900178765.1
	GCF_000395905.1			GCF_000391885.1
	GCF_002140215.1			GCF_000395905.1
	GCF_001543835.1			GCF_002140215.1
	GCF_000395965.1			GCF_001543835.1
	GCF_900178845.1			GCF_000395965.1
	GCF_000396765.1			GCF_900178845.1
	GCF_002141075.1			GCF_000396765.1
	GCF_002174435.1			GCF_002141075.1
	GCF_000392085.1			GCF_002174435.1
	GCF_003320195.1			GCF_000392085.1
	GCF_002848705.1			GCF_003320195.1
	GCF_900179145.1			GCF_002848705.1
	GCF_000321645.1			GCF_900179145.1
	GCF_000322285.1			GCF_000321645.1
	GCF_000392215.1			GCF_000322285.1
	GCF_002158375.1			GCF_000392215.1
	GCF_003320805.1			GCF_002158375.1
	GCF_000392065.1			GCF_003320805.1
	GCF_000395445.1			GCF_000392065.1
	GCF_001696285.1			GCF_000395445.1
	GCF_000395805.1			GCF_001696285.1
	GCF_900178635.1			GCF_000395805.1
	GCF_001721065.1			GCF_900178635.1
	GCF_000391965.1			GCF_001721065.1
	GCF_000294915.2			GCF_000391965.1
	GCF_000396725.1			GCF_000294915.2
	GCF_001696275.1			GCF_000396725.1
	GCF_000295195.2			GCF_001696275.1
	GCF_000294345.2			GCF_000295195.2
	GCF_000396805.1			GCF_000294345.2
	GCF_000395665.1			GCF_000396805.1
	GCF_900179865.1			GCF_000395665.1
	GCF_001518735.1			GCF_900179865.1
	GCF_002850515.1			GCF_001518735.1
	GCF_000322225.1			GCF_002850515.1
	GCF_900179295.1			GCF_000322225.1
	GCF_900178655.1			GCF_900179295.1
	GCF_003320485.1			GCF_900178655.1
	GCF_002140515.1			GCF_003320485.1
	GCF_000395945.1			GCF_002140515.1
	GCF_001676845.1			GCF_000395945.1
	GCF_900180285.1			GCF_001676845.1
	GCF_000394595.1			GCF_900180285.1
	GCF_900179985.1			GCF_000394595.1
	GCF_000394475.1			GCF_900179985.1
	GCF_000295055.2			GCF_000394475.1
	GCF_000295535.2			GCF_000295055.2
	GCF_003320215.1			GCF_000295535.2
	GCF_000321785.1			GCF_003320215.1
	GCF_002562855.1			GCF_000321785.1
	GCF_002761555.1			GCF_002562855.1
	GCF_900178825.1			GCF_002761555.1
	GCF_002174355.1			GCF_900178825.1
	GCF_900143335.1			GCF_002174355.1
	GCF_900180455.1			GCF_900143335.1
	GCF_900179015.1			GCF_900180455.1
	GCF_000394695.1			GCF_900179015.1
	GCF_000395645.1			GCF_000394695.1
	GCF_900148685.1			GCF_000395645.1
	GCF_000391865.1			GCF_900148685.1
	GCF_003320255.1			GCF_000391865.1
	GCF_000407325.1			GCF_003320255.1
	GCF_900178915.1			GCF_000407325.1
	GCF_900143455.1			GCF_900178915.1
	GCF_900178895.1			GCF_900143455.1
	GCF_900179135.1			GCF_900178895.1
	GCF_900178605.1			GCF_900179135.1
	GCF_002973755.1			GCF_900178605.1
	GCF_002973795.1			GCF_002973755.1
	GCF_000395585.1			GCF_002973795.1
	GCF_900179705.1			GCF_000395585.1
	GCF_000322125.1			GCF_900179705.1
	GCF_000321685.1			GCF_000322125.1
	GCF_000294975.2			GCF_000321685.1
	GCF_000393415.1			GCF_000294975.2
	GCF_000393855.1			GCF_000393415.1
	GCF_002140895.1			GCF_000393855.1
	GCF_002158445.1			GCF_002140895.1
	GCF_000391905.1			GCF_002158445.1
	GCF_002631165.1			GCF_000391905.1
	GCF_000396965.1			GCF_002631165.1
	GCF_900180265.1			GCF_000396965.1
	GCF_002140385.1			GCF_900180265.1
	GCF_003320585.1			GCF_002140385.1
	GCF_900179515.1			GCF_003320585.1
	GCF_900178975.1			GCF_900179515.1
	GCF_000391985.1			GCF_900178975.1
	GCF_002848685.1			GCF_000391985.1
	GCF_000407085.1			GCF_002848685.1
	GCF_000295035.2			GCF_000407085.1
	GCF_002831505.1			GCF_000295035.2
	GCF_002591965.2			GCF_002831505.1
	GCF_002140295.1			GCF_002591965.2
	GCF_000395425.1			GCF_002140295.1
	GCF_000295115.2			GCF_000395425.1
	GCF_003320635.1			GCF_000295115.2
	GCF_000322185.1			GCF_003320635.1
	GCF_000321765.1			GCF_000322185.1
	GCF_000294955.2			GCF_000321765.1
	GCF_000294855.2			GCF_000294955.2
	GCF_900179305.1			GCF_000294855.2
	GCF_900179975.1			GCF_900179305.1
	GCF_002141435.1			GCF_900179975.1
	GCF_900179025.1			GCF_002141435.1
	GCF_900179425.1			GCF_900179025.1
	GCF_900180085.1			GCF_900179425.1
	GCF_001412695.1			GCF_900180085.1
	GCF_900180135.1			GCF_001412695.1
	GCF_900179345.1			GCF_900180135.1
	GCF_000391945.1			GCF_900179345.1
	GCF_001582105.1			GCF_000391945.1
	GCF_000295495.2			GCF_001582105.1
	GCF_000396925.1			GCF_000295495.2
	GCF_001543715.1			GCF_000396925.1
	GCF_002848645.1			GCF_001543715.1
	GCF_000394495.1			GCF_002848645.1
	GCF_001582095.1			GCF_000394495.1
	GCF_000322025.1			GCF_001582095.1
	GCF_000394655.1			GCF_000322025.1
	GCF_000395825.1			GCF_000394655.1
	GCF_000391925.1			GCF_000395825.1
	GCF_000394575.1			GCF_000391925.1
	GCF_002265255.1			GCF_000394575.1
	GCF_000395505.1			GCF_002265255.1
	GCF_900179465.1			GCF_000395505.1
	GCF_002848745.1			GCF_900179465.1
	GCF_001721005.1			GCF_002848745.1
	GCF_003202445.1			GCF_001721005.1
	GCF_900179655.1			GCF_003202445.1
	GCF_900179175.1			GCF_900179655.1
	GCF_900178885.1			GCF_900179175.1
	GCF_900178815.1			GCF_900178885.1
	GCF_900178615.1			GCF_900178815.1
	GCF_003320755.1			GCF_900178615.1
	GCF_000391845.1			GCF_003320755.1
	GCF_002983785.1			GCF_000391845.1
	GCF_900178925.1			GCF_002983785.1
	GCF_900179315.1			GCF_900178925.1
	GCF_000395605.1			GCF_900179315.1
	GCF_900178725.1			GCF_000395605.1
	GCF_900178865.1			GCF_900178725.1
	GCF_001592725.1			GCF_900178865.1
	GCF_900179165.1			GCF_001592725.1
	GCF_900179685.1			GCF_900179165.1
	GCF_900179745.1			GCF_900179685.1
	GCF_900179665.1			GCF_900179745.1
	GCF_900180305.1			GCF_900179665.1
	GCF_002894545.1			GCF_900180305.1
	GCF_900179085.1			GCF_002894545.1
	GCF_900179995.1			GCF_900179085.1
	GCF_000295215.2			GCF_900179995.1
	GCF_003320235.1			GCF_000295215.2
	GCF_000321905.1			GCF_003320235.1
	GCF_003320735.1			GCF_000321905.1
	GCF_002803675.1			GCF_003320735.1
	GCF_000295235.2			GCF_002803675.1
	GCF_002630965.1			GCF_000295235.2
	GCF_000321465.1			GCF_002630965.1
	GCF_003020745.1			GCF_000321465.1
	GCF_900148715.1			GCF_003020745.1
	GCF_003320065.1			GCF_900148715.1
	GCF_000407065.1			GCF_003320065.1
	GCF_900180075.1			GCF_000407065.1
	GCF_001543635.1			GCF_900180075.1
	GCF_002140805.1			GCF_001543635.1
				GCF_002140805.1

## Sheet: WGS Accessions FAM strains
Species	Strain	WGS Accession
Pediococcus acidilactici	FAM13473	WENO00000000
	FAM13875*	see FAM13875p
	FAM13875p	WHSF00000000
	FAM13877	WEOO00000000
	FAM13881	WEMZ00000000
	FAM1430	WEOX00000000
	FAM17411	WEOG00000000
	FAM17418	WEMQ00000000
	FAM17419c1	WEOY00000000
	FAM17419c2	WENA00000000
	FAM17419c2i0*	see FAM17419c2
	FAM17419c4	WELM00000000
	FAM17420c1	WEOK00000000
	FAM17420c1i0*	see FAM17420c1
	FAM17420c2	WEMU00000000
	FAM17422	WEPR00000000
	FAM17644	WENL00000000
	FAM17644i0*	see FAM17644
	FAM17656	WELS00000000
	FAM17656i0*	see FAM17656
	FAM17708	WENJ00000000
	FAM17708i0*	see FAM17708
	FAM18098*	see FAM18098p
	FAM18098p	WELT00000000
	FAM18964	WELQ00000000
	FAM18969	VBTF00000000
	FAM18986	WEMI00000000
	FAM18987	WENH00000000
	FAM18988	WEMP00000000
	FAM19071	WEMC00000000
	FAM19133	WEMS00000000
	FAM19134	WELW00000000
	FAM19135	WEMT00000000
	FAM19136	WEMX00000000
	FAM19137	WEMV00000000
	FAM19138	WEMH00000000
	FAM19139	WELR00000000
	FAM19140	WELY00000000
	FAM19141	WEPM00000000
	FAM19142	WEPP00000000
	FAM19148	WEMY00000000
	FAM19149	WEND00000000
	FAM19150	WEOL00000000
	FAM19151	WENW00000000
	FAM19152	WEMF00000000
	FAM19153	WEMB00000000
	FAM19154	WENS00000000
	FAM19155	WELZ00000000
	FAM19156	WEPD00000000
	FAM19157	WELX00000000
	FAM19158	WEPH00000000
	FAM19159	WEOP00000000
	FAM19160	WEPK00000000
	FAM19180	WENU00000000
	FAM19324	WEPO00000000
	FAM19390	WENQ00000000
	FAM19393	WEMN00000000
	FAM19460	WENE00000000
	FAM19461	WEPS00000000
	FAM19462	WEOH00000000
	FAM19464	WEOD00000000
	FAM19466	WENC00000000
	FAM19475	WEMA00000000
	FAM19476	WEME00000000
	FAM19488	WEPE00000000
	FAM19500	WEOT00000000
	FAM19598	WEOF00000000
	FAM19612	WEOR00000000
	FAM19614	WELO00000000
	FAM19619	WENY00000000
	FAM19641	WEMD00000000
	FAM19651	WEMW00000000
	FAM19701	WELN00000000
	FAM19852	WENG00000000
	FAM19879	WENR00000000
	FAM19882	WEPB00000000
	FAM19953	WEOW00000000
	FAM19955	WELV00000000
	FAM20059	WEPI00000000
	FAM20072	WEOB00000000
	FAM20284	WEMK00000000
	FAM20293	WEPF00000000
	FAM20301	WEMG00000000
	FAM20303	WENX00000000
	FAM20310	WEOE00000000
	FAM20325	WENP00000000
	FAM20497	WEOU00000000
	FAM20621	WFHH00000000
	FAM20547	WENT00000000
	FAM20547i0*	see FAM20547
	FAM20551	WEMO00000000
	FAM20552	WENV00000000
	FAM20553	WEPG00000000
	FAM20555	WFHK00000000
	FAM20556	WFHJ00000000
	FAM20557	WEML00000000
	FAM20557i0*	see FAM20557
	FAM20559	WELP00000000
	FAM20559i0*	see FAM20559
	FAM20560	WEOI00000000
	FAM20561	WEPQ00000000
	FAM20562	WEPT00000000
	FAM20579	WEOM00000000
	FAM20580	WEPC00000000
	FAM20620	WFHI00000000
	FAM20622	WEOJ00000000
	FAM20623	WEOC00000000
	FAM20624	WENZ00000000
	FAM20624i0*	see FAM20624
	FAM22132	WEPN00000000
	FAM22234	WEOV00000000
	FAM22235	WEON00000000
	FAM22257	WEPL00000000
	FAM22258	WEMJ00000000
	FAM22259	WEPJ00000000
	FAM22260	WENM00000000
	FAM22261	WEMM00000000
	FAM22262	WENI00000000
Pediococcus pentosaceus	FAM13073	WENB00000000
	FAM17622	WEOA00000000
	FAM18321	WEPA00000000
	FAM18327	WEOZ00000000
	FAM18813	WEOQ00000000
	FAM19080	WENN00000000
	FAM19083	WENK00000000
	FAM19086	WEMR00000000
	FAM19132*	see FAM19132p
	FAM19132p	WENF00000000
	FAM19144	VBTG00000000
	FAM19169	WELU00000000
	FAM20650	WEOS00000000
* Redundant genome assembly (lower quality, same strain)

## Sheet: Pipeline configuration
Pipelineparameter	Enterococcus faecalis	Enterococcus faecium	Pediococcus acidilactici	Pediococcus pentosaceus	Test case 1	Test case 2
offline	False	False	False	False	False	False
skip_download	True	True	True	True	True	True
assemblylevel	complete, chromosome, scaffold	complete, chromosome, scaffold	complete, chromosome, scaffold	all	complete, chromosome, scaffold	complete, chromosome, scaffold
blastseqs	1000	1000	1000	1000	1000	1000
remoteblast	False	False	False	False	False	False
probe	False	False	False	False	False	False
exception	None	None	None	None	None	None
minsize	70	70	70	70	70	70
maxsize	200	200	200	200	200	200
qc_gene	[tuf,recA,dnaK]	[tuf,recA,dnaK]	[tuf,recA,dnaK]	[tuf,recA,dnaK]	[tuf,recA,dnaK]	[tuf,recA,dnaK]
ignore_qc	False	False	False	False	True	False
skip_tree	False	False	False	False	False	False
mfold	-3	-3	-3	-3	-3	-3
mpprimer	-3.5	-3.5	-3.5	-3.5	-3.5	-3.5
mfethreshold	100	90	90	100	90	90
pre-formatted Nucleotide collection (nt) Database: Last updated 20 April 2018
differing from default value
assemblylevel	The default value was changed to excluded contig level to decrease the number of input genomes. The aim was to have a large diversity, but only as many genome assemblies as needed.
mfethreshold	We wanted to decrease the number of reported primers and to report only the best primers, therefore we set a higher mfethreshold (select for a PPC of 100).
qc_gene	Default is rRNA, however tuf works equally well for the differentiation of these species. Using more than one gene can increase certainity.

## Sheet: Species list
Acidipropionibacterium acidipropionici
Acidipropionibacterium jensenii
Acidipropionibacterium thoenii
Acinetobacter baumannii
Acinetobacter bereziniae
Acinetobacter johnsonii
Acinetobacter parvus
Advenella kashmirensis
Aerococcus viridans
Agrococcus casei
Alcaligenes faecalis
Alkalibacterium kapii
Arthrobacter arilaitensis
Arthrobacter bergerei
Arthrobacter globiformis
Arthrobacter nicotianae
Bacillus altitudinis
Bacillus fordii
Bacillus galactosidilyticus
Bacillus pumilus
Bacillus subtilis
Bacteroides plebeius
Bavariicoccus seileri
Bifidobacterium adolescentis
Bifidobacterium animalis subsp. animalis
Bifidobacterium animalis subsp. lactis
Bifidobacterium bifidum
Bifidobacterium breve
Bifidobacterium longum
Bifidobacterium pseudolongum subsp. pseudolongum
Bifidobacterium thermophilum
Brachybacterium alimentarium
Brachybacterium tyrofermentans
Brevibacillus parabrevis
Brevibacterium antiquum
Brevibacterium aurantiacum
Brevibacterium casei
Brevibacterium linens
Brevundimonas diminuta
Brochothrix thermosphacta
Carnobacterium divergens
Carnobacterium maltaromaticum
Carnobacterium mobile
Chryseobacterium bovis
Chryseobacterium ginsengisoli
Chryseobacterium haifense
Chryseobacterium joostei
Chryseobacterium shigense
Chryseobacterium vrystaatense
Citrobacter freundii
Clostridium beijerinckii
Clostridium botulinum
Clostridium butyricum
Clostridium disporicum
Clostridium tyrobutyricum
Corynebacterium ammoniagenes
Corynebacterium bovis
Corynebacterium casei
Corynebacterium flavescens
Corynebacterium glutamicum
Corynebacterium propinquum
Corynebacterium stationis
Corynebacterium tuberculostearicum
Corynebacterium variabile
Cutibacterium acnes
Debaryomyces hansenii
Delftia acidovorans
Dietzia maris
Enterococcus casseliflavus
Enterococcus durans
Enterococcus faecalis
Enterococcus faecium
Enterococcus gallinarum
Enterococcus gilvus
Enterococcus hirae
Enterococcus italicus
Enterococcus malodoratus
Enterococcus pseudoavium
Exiguobacterium acetylicum
Exiguobacterium sibiricum
Facklamia tabacinasalis
Galactomyces candidum
Geotrichum candidum
Glutamicibacter arilaitensis
Glutamicibacter bergerei
Glutamicibacter nicotianae
Hafnia alvei
Halomonas venusta
Intestinibacter bartlettii
Janthinobacterium lividum
Jeotgalicoccus psychrophilus
Klebsiella aerogenes
Klebsiella oxytoca
Kluyvera intermedia
Kocuria atrinae
Kocuria carniphila
Kocuria kristinae
Kocuria palustris
Kocuria rhizophila
Kocuria varians
Kurthia gibsonii
Lactobacillus acidipiscis
Lactobacillus acidophilus
Lactobacillus amylolyticus
Lactobacillus amylophilus
Lactobacillus brevis
Lactobacillus buchneri
Lactobacillus casei
Lactobacillus coryniformis
Lactobacillus coryniformis subsp. coryniformis
Lactobacillus curvatus
Lactobacillus delbrueckii
Lactobacillus delbrueckii subsp. bulgaricus
Lactobacillus delbrueckii subsp. delbrueckii
Lactobacillus delbrueckii subsp. lactis
Lactobacillus dextrinicus
Lactobacillus fermentum
Lactobacillus gallinarum
Lactobacillus gasseri
Lactobacillus graminis
Lactobacillus harbinensis
Lactobacillus helveticus
Lactobacillus kefiri
Lactobacillus nenjiangensis
Lactobacillus nodensis
Lactobacillus oligofermentans
Lactobacillus parabrevis
Lactobacillus parabuchneri
Lactobacillus paracasei
Lactobacillus paracasei subsp. paracasei
Lactobacillus parafarraginis
Lactobacillus parakefiri
Lactobacillus paraplantarum
Lactobacillus pentosus
Lactobacillus perolens
Lactobacillus plantarum
Lactobacillus plantarum subsp. argentoratensis
Lactobacillus plantarum subsp. plantarum
Lactobacillus rhamnosus
Lactobacillus sakei
Lactobacillus salivarius
Lactobacillus satsumensis
Lactobacillus tucceti
Lactobacillus vaccinostercus
Lactococcus garvieae
Lactococcus lactis
Lactococcus lactis subsp. cremoris
Lactococcus lactis subsp. lactis
Lactococcus raffinolactis
Lelliottia amnigena
Leucobacter komagatae
Leuconostoc carnosum
Leuconostoc citreum
Leuconostoc lactis
Leuconostoc mesenteroides
Leuconostoc mesenteroides subsp. cremoris
Leuconostoc mesenteroides subsp. dextranicum
Leuconostoc mesenteroides subsp. mesenteroides
Leuconostoc pseudomesenteroides
Listeria innocua
Listeria monocytogenes
Luteococcus japonicus
Macrococcus caseolyticus
Marinilactibacillus psychrotolerans
Meiothermus silvanus
Microbacterium foliorum
Microbacterium gubbeenense
Microbacterium lacticum
Microbacterium oxydans
Micrococcus luteus
Moraxella osloensis
Morganella morganii
Morganella psychrotolerans
Mycobacterium vaccae
Ornithinibacillus bavariensis
Paenibacillus lactis
Paludibacter propionicigenes
Pantoea agglomerans
Pediococcus acidilactici
Pediococcus pentosaceus
Pediococcus stilesii
Porphyromonas levii
Propionibacterium acidipropionici
Propionibacterium acnes
Propionibacterium freudenreichii
Propionibacterium freudenreichii subsp. freudenreichii
Propionibacterium freudenreichii subsp. shermanii
Propionibacterium jensenii
Propionibacterium thoenii
Proteus hauseri
Proteus vulgaris
Providencia alcalifaciens
Providencia heimbachae
Providencia rettgeri
Pseudoclavibacter helvolus
Pseudomonas asplenii
Pseudomonas fluorescens
Pseudomonas fragi
Pseudomonas lundensis
Pseudomonas marginalis
Pseudomonas putida
Psychrobacter aquimaris
Psychrobacter celer
Psychrobacter faecalis
Psychrobacter immobilis
Psychrobacter namhaensis
Raoultella ornithinolytica
Raoultella planticola
Reyranella massiliensis
Rhodanobacter glycinis
Rothia mucilaginosa
Salmonella enterica subsp. enterica serovar Typhimurium
Serratia marcescens
Serratia proteamaculans
Serratia rubidaea
Sphingobacterium faecium
Staphylococcus aureus
Staphylococcus capitis
Staphylococcus caprae
Staphylococcus chromogenes
Staphylococcus cohnii
Staphylococcus epidermidis
Staphylococcus equorum
Staphylococcus equorum subsp. equorum
Staphylococcus equorum subsp. linens
Staphylococcus fleurettii
Staphylococcus haemolyticus
Staphylococcus hominis
Staphylococcus lentus
Staphylococcus sciuri
Staphylococcus sciuri subsp. sciuri
Staphylococcus succinus
Staphylococcus succinus subsp. casei
Staphylococcus vitulinus
Staphylococcus warneri
Staphylococcus xylosus
Stenotrophomonas indologenes
Stenotrophomonas maltophilia
Stenotrophomonas rhizophila
Streptococcus infantarius subsp. infantarius
Streptococcus lutetiensis
Streptococcus macedonicus
Streptococcus parauberis
Streptococcus pneumoniae
Streptococcus salivarius
Streptococcus thermophilus
Streptococcus uberis
Streptococcus vestibularis
Terrisporobacter mayombei
Tetragenococcus halophilus
Thermus thermophilus
Vagococcus fluvialis
Vagococcus lutrae
Vibrio casei
Vibrio litoralis
Weissella cibaria
Weissella hellenica
Weissella paramesenteroides
Yarrowia lipolytica
