# Supplementary material for: SpeciesPrimer: a bioinformatics pipeline dedicated to the design of qPCR primers for the quantification of bacterial species
Source: PeerJ. 2020 Feb 18;8:e8544. doi: 10.7717/peerj.8544 (PMC7034379; doi:10.7717/peerj.8544)
Supplement: Dataset S2 — Dataset content: Target strains, Non-target strains, Cultivation conditions [file peerj-08-8544-s002.xlsx]

## Sheet: Target strains
Species	Strainname	Isolation source	Reference	Original depositor; strain designation
Enterococcus faecalis	ATCC 19433	Unknown	ATCC2)	NIRD		1) German Collection of Microorganisms and Cell Cultures
Enterococcus faecalis	FAM 22123	Natural starter (whey)	ACC3)			2) ATCC, Virginia, USA
Enterococcus faecalis	DSM 20376	Milk (raw)	DSMZ1)	Kiel; 26487		3) Agroscope Culture Collection (Switzerland)
Enterococcus faecalis	DSM 20380	Abscess	DSMZ1)	Kiel; 26703
Enterococcus faecalis	FAM 2922	Unknown	ACC3)
Enterococcus faecalis	FAM 8254	Unknown	ACC3)
Enterococcus faecalis	FAM 8493	Unknown	ACC3)
Enterococcus faecalis	FAM 8494	Unknown	ACC3)
Enterococcus faecalis	FAM 8495	Unknown	ACC3)
Enterococcus faecalis	FAM 10310	Milk	ACC3)
Enterococcus faecalis	FAM 20649	Cheese (Tilsit)	ACC3)
Enterococcus faecalis	FAM 20853	Cheese (Raclette)	ACC3)
Enterococcus faecalis	FAM 22196	Natural starter (whey)	ACC3)
Enterococcus faecalis	FAM 22219	Unknown	ACC3)
Enterococcus faecalis	FAM 22220	Unknown	ACC3)
Enterococcus faecalis	FAM 22237	Natural starter (whey)	ACC3)
Enterococcus faecalis	FAM 22739	Milk (incubated)	ACC3)
Enterococcus faecalis	FAM 22965	Cheese (Raclette)	ACC3)
Enterococcus faecalis	FAM 23457	Cheese	ACC3)
Enterococcus faecalis	DSM 20060	Silage	DSMZ1)	T. Beck; 2409
Enterococcus faecalis	DSM 29488	Feces (Mouse)	DSMZ1)	T. Clavel, TU Munich, Freising-Weihenstephan, Germany; BLGJ-x-F-MMA-1-1
Enterococcus faecalis	DSM 20371	Pleural fluid	DSMZ1)	Kie; 27738
Enterococcus faecium	DSM 20477	Unknown	DSMZ1)	A. Grumbach
Enterococcus faecium	FAM 1711	Cheese (Appenzell)	ACC3)
Enterococcus faecium	FAM 19316	Cheese (Emmental)	ACC3)
Enterococcus faecium	FAM 1381	Unknown	ACC3)
Enterococcus faecium	FAM 1567	Cheese	ACC3)
Enterococcus faecium	FAM 1719	Ventrux Acido (capsule)	ACC3)
Enterococcus faecium	FAM 1818	Starter culture (undefined)	ACC3)
Enterococcus faecium	FAM 2882	Starter culture (undefined)	ACC3)
Enterococcus faecium	FAM 17414	Cheese (Gruyère)	ACC3)
Enterococcus faecium	FAM 17991	Cow	ACC3)
Enterococcus faecium	FAM 20339	Cheese (Gruyère)	ACC3)
Enterococcus faecium	FAM 20680	Cheese (Tilsit)	ACC3)
Enterococcus faecium	FAM 20854	Cheese (Raclette)	ACC3)
Enterococcus faecium	FAM 22738	Milk (incubated)	ACC3)
Enterococcus faecium	DSM 2146	Cheese	DSMZ1)	J.M. Skerman (Streptococcus faecalis)
Enterococcus faecium	DSM 13589	Feces (human)	DSMZ1)	J. Wagner, Freie Univ. Berlin
Enterococcus faecium	DSM 13590	Feces (human)	DSMZ1)	J. Wagner, Freie Univ. Berlin
Enterococcus faecium	DSM 17050	Hospital	DSMZ1)	Merlin GmbH
Enterococcus faecium	DSM 25389	Feces (human)	DSMZ1)	R. J.L. Willems
Enterococcus faecium	DSM 25390	Clinical isolate	DSMZ1)	W. van Schalk, University Medical Center Utrecht, Dept. of Med. Microbiol., The Netherlands; U0317
Enterococcus faecium	DSM 25644	Patient	DSMZ1)	Marina Goderdzishvili, Eliava Institute of Bacteriophages, Microbiology and Virology, Tbilisi, Georgia
Enterococcus faecium	DSM 25697	Feces (human)	DSMZ1)	Korean National Institute of Health
Enterococcus faecium	DSM 25698	Feces (human)	DSMZ1)	Korean National Institute of Health
Enterococcus faecium	DSM 25699	Feces (human)	DSMZ1)	Korean National Institute of Health
Enterococcus faecium	DSM 25868	Feces (human)	DSMZ1)	Korean National Institute of Health
Pediococcus acidilactici	FAM 13875	Cheese (Emmental)	ACC3)
Pediococcus acidilactici	FAM 17411	Cheese (Gruyère)	ACC3)
Pediococcus acidilactici	FAM 17708	Cheese (Gruyère)	ACC3)
Pediococcus acidilactici	FAM 18987	Cheese (Tête de Moine)	ACC3)
Pediococcus acidilactici	FAM 18988	Cheese (Tête de Moine)	ACC3)
Pediococcus acidilactici	FAM 19071	Cheese (Tête de Moine)	ACC3)
Pediococcus acidilactici	FAM 19324	Cheese (Emmental)	ACC3)
Pediococcus acidilactici	FAM 19475	Cheese (Emmental)	ACC3)
Pediococcus acidilactici	FAM 19612	Cheese (Emmental)	ACC3)
Pediococcus acidilactici	FAM 19641	Cheese (Emmental)	ACC3)
Pediococcus acidilactici	FAM 19852	Cheese (Emmental)	ACC3)
Pediococcus acidilactici	FAM 19882	Cheese (Emmental)	ACC3)
Pediococcus acidilactici	FAM 20284	Cheese (Emmental)	ACC3)
Pediococcus acidilactici	FAM 20325	Cheese (Emmental)	ACC3)
Pediococcus acidilactici	FAM 20557	Cheese (Gruyère)	ACC3)
Pediococcus acidilactici	FAM 20623	Cheese (Gruyère)	ACC3)
Pediococcus acidilactici	FAM 22234	Natural starter (whey)	ACC3)
Pediococcus acidilactici	DSM 20284	Barley	DSMZ1)	W. Back; B213c
Pediococcus acidilactici	FAM 13881	Cheese (Emmental)	ACC3)
Pediococcus acidilactici	FAM 19158	Cheese (Tilsit)	ACC3)
Pediococcus pentosaceus	FAM 13073	Cheese (Tilsit)	ACC3)
Pediococcus pentosaceus	FAM 13874	Cheese (Emmental)	ACC3)
Pediococcus pentosaceus	FAM 17622	Cheese (Gruyère)	ACC3)
Pediococcus pentosaceus	FAM 18047	Unknown	ACC3)
Pediococcus pentosaceus	FAM 18048	Starter culture (sausage)	ACC3)
Pediococcus pentosaceus	FAM 18049	Starter culture (sausage)	ACC3)
Pediococcus pentosaceus	FAM 18051	Starter culture (sausage)	ACC3)
Pediococcus pentosaceus	FAM 18321	Sausage (Appenzell)	ACC3)
Pediococcus pentosaceus	FAM 18327	Sausage	ACC3)
Pediococcus pentosaceus	FAM 18747	Sausage (Salami)	ACC3)
Pediococcus pentosaceus	FAM 18813	Cheese (Tête de Moine)	ACC3)
Pediococcus pentosaceus	FAM 18909	Sausage	ACC3)
Pediococcus pentosaceus	FAM 18965	Cheese (Tête de Moine)	ACC3)
Pediococcus pentosaceus	FAM 19052	Cheese (Tête de Moine)	ACC3)
Pediococcus pentosaceus	FAM 19132	Milk	ACC3)
Pediococcus pentosaceus	FAM 19144	Cheese (Sbrinz)	ACC3)
Pediococcus pentosaceus	FAM 19161	Cheese (Tilsit)	ACC3)
Pediococcus pentosaceus	FAM 19164	Cheese (Tilsit)	ACC3)
Pediococcus pentosaceus	FAM 19167	Cheese (Tilsit)	ACC3)
Pediococcus pentosaceus	FAM 19169	Cheese (Tilsit)	ACC3)
Pediococcus pentosaceus	FAM 20650	Cheese (Tilsit)	ACC3)
Pediococcus pentosaceus	FAM 22491	Whey	ACC3)
Pediococcus pentosaceus	DSM 20336	Yeast (dried)	DSMZ1)	C.B. van Niel
Pediococcus pentosaceus	DSM 20333	Mash (sake)	DSMZ1)	K. Kitahara, P. lin
Pediococcus pentosaceus	DSM 20280	Yeast	DSMZ1)	W. Back; 243d (Pediococcus pentosaceus subsp. intermedius)

## Sheet: Non-target strains
Species	Strainname	Isolation source	Reference	Original depositor; strain designation
Acidipropionibacterium acidipropionici	DSM 4900	Unknown	DSMZ1)	A. Prévot; 14X (Propionibacterium pentosaceum)		1) German Collection of Microorganisms and Cell Cultures
Acidipropionibacterium acidipropionici	DSM 20272	Cheese (Emmental)	DSMZ1)	C.B. van Niel; 4 (Propionibacterium pentosaceum)		2) ATCC, Virginia, USA
Acidipropionibacterium acidipropionici	DSM 20273	Unknown	DSMZ1)	E.R. Hitchner; 61 (Propionibacterium arabinosum)		3) Agroscope Culture Collection (Switzerland)
Clostridium beijerinckii	DSM 791	Unknown	DSMZ1)	L. DS. Smith, Virginia Polytechnical Institute and State University, Blacksburg, V., USA; VPI 5481		4) Culture Collection University of Gothenburg
Clostridium beijerinckii	FAM 1318	Unknown	ACC3)			5) Belgian Co-Ordinated Collections of Micro-Organisms
Clostridium beijerinckii	FAM 1351	Cheese	ACC3)			6) National Collection of Industrial Food and Marine Bacteria
Clostridium butyricum	DSM 10702	Intestine (pig)	DSMZ1)	J. W. Howie; strain Rowett
Clostridium butyricum	FAM 19008	Milk	ACC3)			* Identified as Lactobacillus amylovorus by partial tuf gene sequencing
Clostridium butyricum	FAM 19012	Milk	ACC3)
Clostridium ljungdahlii	DSM 13528	Chicken yard waste	DSMZ1)	S. Barik, University of Arkansas Medical Sciences, Little Rock, USA; PETC
Clostridium sporogenes	DSM 795	Soil	DSMZ1)	E.C. Peterson
Clostridium sporogenes	FAM 22878	Cheese (Sapsago)	ACC3)
Clostridium sporogenes	FAM 1748	Cheese (Gruyère)	ACC3)
Clostridium tyrobutyricum	DSM 2637	Unknown	DSMZ1)	G. Hobbs
Clostridium tyrobutyricum	FAM 1550	Cheese	ACC3)
Clostridium tyrobutyricum	FAM 22550	Cheese (Winzer Délice)	ACC3)
Enterococcus durans	DSM 20633	Milk (dried)	DSMZ1)	J.M. Sherman; 98 D
Enterococcus durans	FAM 19822	Cheese (Emmental)	ACC3)
Enterococcus durans	FAM 22256	Natural starter (whey)	ACC3)
Enterococcus faecalis	ATCC 19433	Unknown	ATCC2)	NIRD; Tissier
Enterococcus faecalis	FAM 22123	Natural starter (whey)	ACC3)
Enterococcus faecalis	DSM 20376	Milk (raw)	DSMZ1)	Kiel; 26487
Enterococcus faecium	DSM 20477	Unknown	DSMZ1)	A. Grumbach
Enterococcus faecium	FAM 1711	Cheese (Appenzell)	ACC3)
Enterococcus faecium	FAM 19316	Cheese (Emmental)	ACC3)
Lactobacillus acidophilus	DSM 20079	Human	DSMZ1)	W.L. Kulp, strain Scav
Lactobacillus acidophilus	FAM 22749	Starter culture (undefined)	ACC3)
Lactobacillus acidophilus	FAM 22751	Starter culture (undefined)	ACC3)
Lactobacillus amylovorus	DSM 20531	Cattle waste-corn fermentation	DSMZ1)	G.R. Hrubant
Lactobacillus amylovorus	NCIMB 702745	Small intestine (pig)	NCIMB6)	WE Moore, American Type Culture Collection (ATCC); VPI 1754
Lactobacillus amylovorus *	NCIMB 702663	Feces (pig)	NCIMB6)	M. Briggs, NIRD; 237 (Lactobacillus acidophilus)
Lactobacillus brevis	DSM 20054	Feces	DSMZ1)	S. Orla-Jensen; 14 (Betabacterium breve)
Lactobacillus brevis	CCUG 33268	Abdomen (human)	CCUG4)	L. Karmenstad, PHL, Växjö, Sweden
Lactobacillus brevis	CCUG 48612	Blood (human)	CCUG4)	B.-M. Ellis, PHL, Karlskrona, Sweden
Lactobacillus buchneri	DSM 20057	Tomato pulp	DSMZ1)	F.L. Mickle (Lactobacillus lycopersici)
Lactobacillus buchneri	LMG 11439	Unknown	BCCM/LMG5)	V. Cheldelin
Lactobacillus buchneri	LMG 11985	Oral cavity	BCCM/LMG5)	E. Tilden
Lactobacillus casei	ATCC 393	Dairy products	ATCC2)	S. Orla-Jensen; 7 (Streptobacterium casei)
Lactobacillus casei	FAM 20446	Cheese (Gruyère)	ACC3)
Lactobacillus coryniformis	FAM 20761	Cheese (Tilsit)	ACC3)
Lactobacillus coryniformis subsp. coryniformis	DSM 20001	Silage	DSMZ1)	I. G. Abo-Elnaga; 34
Lactobacillus coryniformis subsp. torquens	DSM 20004	Cow shed	DSMZ1)	I. G. Abo-Elnaga; 30
Lactobacillus crispatus	DSM 20584	Eye	DSMZ1)	A. Prévot (Eubacterium crispatum)
Lactobacillus crispatus	DSM 20356	Feces (turkey)	DSMZ1)	M.E. Sharpe; A 12 (Lactobacillus acidophilus)
Lactobacillus crispatus	NCIMB 4504	Vagina (human)	NCIMB6)	R. Cruickshank, National Collection of Type Cultures (NCTC); 2
Lactobacillus curvatus	DSM 20019	Milk	DSMZ1)	I. G. Abo-Elnaga; 1
Lactobacillus curvatus	FAM 18731	Sausage (Salami)	ACC3)
Lactobacillus curvatus	FAM 18867	Sausage (Vaudois)	ACC3)
Lactobacillus delbrueckii subsp. bulgaricus	DSM 20081	Yoghourt (Bulgarian)	DSMZ1)	S. Orla-Jensen; 14 (Thermobacterium bulgaricum)
Lactobacillus delbrueckii subsp. delbrueckii	DSM 20074	Mash (sour grain)	DSMZ1)	M. Rogosa
Lactobacillus delbrueckii subsp. lactis	DSM 20072	Cheese (Emmental)	DSMZ1)	A. Snog-Kjaer (S. Orla-Jensen Thermobacterium lactis No. 10)
Lactobacillus equicursoris	DSM 19284	Horse	DSMZ1)	H. Morita and H. Shiono, Azabu Univ., Sagamihara, Japan; DI70
Lactobacillus fermentum	DSM 20052	Fermented beets	DSMZ1)	S. Orla-Jensen; 28 (Betabacterium longum)
Lactobacillus fermentum	FAM 11660	Whey	ACC3)
Lactobacillus gallinarum	DSM 10532	Crop (chicken)	DSMZ1)	J.L. Johnson; VPI 1294
Lactobacillus gallinarum	LMG 14751	Feces (chicken)	BCCM/LMG5)	T. Fujisawa via Boot H., University of Amsterdam
Lactobacillus gallinarum	LMG 14754	Feces (chicken)	BCCM/LMG5)	T. Fujisawa via Boot H., University of Amsterdam
Lactobacillus graminis	DSM 20719	Silage	DSMZ1)	R. Beck; G90(1)
Lactobacillus helveticus	DSM 20075	Cheese (Emmental)	DSMZ1)	S. Orla-Jensen; 12 (Thermobacterium helveticum)
Lactobacillus helveticus	FAM 13019	Natural starter (whey)	ACC3)
Lactobacillus helveticus	FAM 19190	Cheese (Gruyère)	ACC3)
Lactobacillus kefiri	DSM 20587	Kefir grains	DSMZ1)	P. Kunath; AK
Lactobacillus koreensis	DSM 27983	Cabbage kimchi	DSMZ1)	D.-C. Yang, Kyung Hee University, Gyeonggi-do, South Korea; DCY50
Lactobacillus parabuchneri	DSM 5707	Saliva (human)	DSMZ1)	A.C. Hayward; 6E
Lactobacillus parabuchneri	FAM 21731	Cheese (Emmental)	ACC3)
Lactobacillus parabuchneri	FAM 21823	Cheese	ACC3)
Lactobacillus paracasei	DSM 5622	Unknown	DSMZ1)	NIRD; RO94 (Lactobacillus casei)
Lactobacillus paracasei	FAM 18133.2	Cheese	ACC3)
Lactobacillus paracasei	FAM 19331	Cheese (Emmental)	ACC3)
Lactobacillus paraplantarum	DSM 10667	Beer	DSMZ1)	Brasseries Kronenbourg; CST 10961
Lactobacillus paraplantarum	DSM 10641	Unknown	DSMZ1)	E.B. Fred; 102 (Lactobacillus plantarum)
Lactobacillus paraplantarum	FAM 18197	Sausage (Salami)	ACC3)
Lactobacillus pentosus	DSM 20314	Unknown	DSMZ1)	E.E. Snell; 124-2 (Lactobacillus plantarum)
Lactobacillus pentosus	FAM 6023	Unknown	ACC3)
Lactobacillus pentosus	FAM 20647	Cheese (Tilsit)	ACC3)
Lactobacillus plantarum	DSM 20174	Pickled cabbage	DSMZ1)	S. Orla-Jensen; No. 39 (Streptobacterium plantarum)
Lactobacillus plantarum	ATCC 8014	Unknown	ATCC2)	E. McCoy
Lactobacillus plantarum	FAM 18858	Sausage (Vaudois)	ACC3)
Lactobacillus rhamnosus	DSM 20021	Unknown	DSMZ1)	F.M. Strong
Lactobacillus rhamnosus	FAM 19984	Cheese (Emmental)	ACC3)
Lactobacillus rhamnosus	FAM 22674	Cheese (Sbrinz)	ACC3)
Lactobacillus sakei	FAM 14960	Milk	ACC3)
Lactobacillus sakei subsp. carnosum	DSM 15831	Meat (fermented)	DSMZ1)	G. Reuter
Lactobacillus sakei subsp. sakei	DSM 20017	Starter culture (Sake)	DSMZ1)	K. Kitahara; T.S.
Lactobacillus zeae	DSM 20178	Corn steep liquor	DSMZ1)	RIA (Lactobacterium zeae)
Lactococcus garvieae subsp. garvieae	DSM 20684	Bovine mastitis	DSMZ1)	J. Bramley; 0159
Lactococcus lactis subsp. cremoris	DSM 20069	Unknown	DSMZ1)	Whitehead; HP
Lactococcus lactis subsp. cremoris	FAM 17873	Milk	ACC3)
Lactococcus lactis subsp. cremoris	FAM 23216	Barley	ACC3)
Lactococcus lactis subsp. lactis	ATCC 19435	Unknown	ATCC2)	PMF Shattock
Lactococcus lactis subsp. lactis	FAM 17950	Milk (goat)	ACC3)
Lactococcus lactis subsp. lactis	FAM 23201	Pasture grass	ACC3)
Lactococcus lactis subsp. lactis biovar diacetylactis	FAM 2884	Starter culture	ACC3)
Lactococcus lactis subsp. lactis biovar diacetylactis	FAM 18362	Unknown	ACC3)
Lactococcus lactis subsp. lactis biovar diacetylactis	FAM 21999	Unknown	ACC3)
Leuconostoc carnosum	DSM 5576	Beef (vakuum-packaged)	DSMZ1)	B.G. Shaw; SML40
Leuconostoc lactis	DSM 20202	Milk	DSMZ1)	T. Gibson
Leuconostoc lactis	DSM 20192	Cheese	DSMZ1)	NIZO; Zg V1
Leuconostoc lactis	FAM 22486	Milk (incubated)	ACC3)
Leuconostoc mesenteroides subsp. cremoris	DSM 20346	Starter culture (dried)	DSMZ1)	E.I. Garvie; LF2
Leuconostoc mesenteroides subsp. dextranicum	DSM 20484	Unknown	DSMZ1)	S. Orla-Jensen
Leuconostoc mesenteroides subsp. mesenteroides	DSM 20343	Olives (fermented)	DSMZ1)	R.H. Vaughn; 37 Y
Leuconostoc mesenteroides subsp. suionicum	DSM 20241	Unknown	DSMZ1)	W. Gingrich; 535
Leuconostoc pseudomesenteroides	DSM 20193	Cane juice	DSMZ1)	R.D. De Moss; 39 (Leuconostoc mesenteroides)
Leuconostoc pseudomesenteroides	FAM 23926	Grapes	ACC3)
Leuconostoc pseudomesenteroides	FAM 23927	Grapes	ACC3)
Pediococcus acidilactici	DSM 20284	Barley	DSMZ1)	W. Back; B213c
Pediococcus acidilactici	FAM 13881	Cheese (Emmental)	ACC3)
Pediococcus acidilactici	FAM 19158	Cheese (Tilsit)	ACC3)
Pediococcus pentosaceus	DSM 20336	Yeast (dried)	DSMZ1)	C.B. van Niel
Pediococcus pentosaceus	DSM 20333	Mash (sake)	DSMZ1)	K. Kitahara, P. lin
Pediococcus pentosaceus	DSM 20280	Yeast	DSMZ1)	W. Back; 243d (Pediococcus pentosaceus subsp. intermedius)
Pediococcus stilesii	DSM 18001	Maize grains (white)	DSMZ1)	W.H. Holzapfel; strain BFE 1652
Pediococcus stilesii	FAM 18814	Cheese (Tête de Moine)	ACC3)
Propionibacterium freudenreichii	DSM 20271	Cheese	DSMZ1)	C.H. Werkman; 53-W (Hitchner, No. 33)
Propionibacterium freudenreichii	FAM 15217.1	Cheese (Appenzell)	ACC3)
Propionibacterium freudenreichii	FAM 15346	Cheese (Gruyère)	ACC3)
Streptococcus salivarius	FAM 22223	Starter culture	ACC3)
Streptococcus salivarius subsp. salivarius	DSM 20560	Blood (human)	DSMZ1)	J.C. Small
Streptococcus thermophilus	DSM 20617	Milk (pasteurized)	DSMZ1)	P.M.F. Shattock; (B of R)
Streptococcus thermophilus	FAM 10792	Unknown	ACC3)
Streptococcus thermophilus	FAM 21476	Starter culture (undefined)	ACC3)

## Sheet: Cultivation conditions
Species	Medium	Temperature	Incubation
Acidipropionibacterium acidipropionici	MRS-lactose broth	30°C	2 days
Clostridium beijerinckii	Bryant and Burkey broth	37°C	3 days
Clostridium butyricum	Bryant and Burkey broth	37°C	6 days
Clostridium ljungdahlii	Bryant and Burkey broth	37°C	6 days
Clostridium sporogenes	Bryant and Burkey broth	37°C	3 days
Clostridium tyrobutyricum	Bryant and Burkey broth	37°C	4 days
Enterococcus durans	MRS broth	37°C	1 day
Enterococcus faecalis	MRS broth	37°C	1 day
Enterococcus faecium	MRS broth	37°C	1 day
Lactobacillus acidophilus	MRS broth	37°C	1 day
Lactobacillus amylovorus	MRS broth	37°C	1 day
Lactobacillus brevis	MRS broth	37°C	2 days
Lactobacillus buchneri	MRS broth	37°C	1 day
Lactobacillus casei	MRS broth	30°C	1 day
Lactobacillus coryniformis	MRS broth	30°C	1 day
Lactobacillus coryniformis subsp. coryniformis	MRS broth	30°C	1 day
Lactobacillus coryniformis subsp. torquens	MRS broth	30°C	1 day
Lactobacillus crispatus	MRS broth	37°C	1 day
Lactobacillus curvatus	MRS broth	30°C	1 day
Lactobacillus delbrueckii subsp. bulgaricus	MRS broth	37°C	2 days
Lactobacillus delbrueckii subsp. delbrueckii	MRS broth	37°C	2 days
Lactobacillus delbrueckii subsp. lactis	MRS broth	37°C	2 days
Lactobacillus equicursoris	MRS broth	37°C	1 day
Lactobacillus fermentum	MRS broth	37°C	1 day
Lactobacillus gallinarum	MRS broth	37°C	1 day
Lactobacillus graminis	MRS broth	30°C	1 day
Lactobacillus helveticus	MRS broth	30°C	1 day
Lactobacillus kefiri	MRS broth	30°C	1 day
Lactobacillus koreensis	MRS broth	30°C	1 day
Lactobacillus parabuchneri	MRS broth	37°C	1 day
Lactobacillus paracasei	MRS broth	30°C	1 day
Lactobacillus paraplantarum	MRS broth	30°C	1 day
Lactobacillus pentosus	MRS broth	37°C	1 day
Lactobacillus plantarum	MRS broth	30°C	1 day
Lactobacillus rhamnosus	MRS broth	30°C	1 day
Lactobacillus sakei	MRS broth	30°C	1 day
Lactobacillus sakei subsp. carnosum	MRS broth	30°C	1 day
Lactobacillus sakei subsp. sakei	MRS broth	30°C	1 day
Lactobacillus zeae	MRS broth	30°C	1 day
Lactococcus garvieae subsp. garvieae	MRS broth	30°C	1 day
Lactococcus lactis subsp. cremoris	MRS broth	30°C	1 day
Lactococcus lactis subsp. lactis	MRS broth	30°C	1 day
Lactococcus lactis subsp. lactis biovar diacetylactis	MRS broth	30°C	1 day
Leuconostoc carnosum	MRS broth	30°C	1 day
Leuconostoc lactis	MRS broth	30°C	1 day
Leuconostoc mesenteroides subsp. cremoris	MRS broth	30°C	1 day
Leuconostoc mesenteroides subsp. dextranicum	MRS broth	30°C	1 day
Leuconostoc mesenteroides subsp. mesenteroides	MRS broth	30°C	1 day
Leuconostoc mesenteroides subsp. suionicum	MRS broth	30°C	1 day
Leuconostoc pseudomesenteroides	MRS broth	30°C	1 day
Pediococcus acidilactici	MRS broth	37°C	1 day
Pediococcus pentosaceus	MRS broth	37°C	1 day
Pediococcus stilesii	MRS broth	37°C	1 day
Propionibacterium freudenreichii	MRS-lactose broth	30°C	3 days
Streptococcus salivarius subsp. salivarius	Trypticase soy broth	37°C	1 day
Streptococcus thermophilus	M17 broth	37°C	1 day
MRS: De Man, J.C., M. Rogosa, and M.E. Sharpe. A medium for the cultivation of lactobacilli. Journal of Applied Bacteriology, 1960. 23(1): p. 130-135.
Bryant and Burkey: Bryant M. P. and Burkey L. A., 1956, J. Bacetriol., 71: 43-46.
Trypticase soy broth: Anderson, N.L., et al. Cumitech 3B; Quality Systems in the Clinical Microbiology Laboratory, Coordinating ed., A.S. Weissfeld. American Society for Microbiology, Washington, D.C.
MRS-lactose: MRS with 2 % lactose instead of 2% glucose
M17: Terzaghi, B.E. and W.E. Sandine, Improved medium for lactic streptococci and their bacteriophages. Applied microbiology, 1975. 29(6): p. 807-813.
