# Supplementary material for: SpeciesPrimer: a bioinformatics pipeline dedicated to the design of qPCR primers for the quantification of bacterial species
Source: PeerJ. 2020 Feb 18;8:e8544. doi: 10.7717/peerj.8544 (PMC7034379; doi:10.7717/peerj.8544)
Supplement: Dataset S4 — Dataset content: Input genomes, Negative set genomes, Software dependencies, Run commands Primer, Primer-BLAST summary [file peerj-08-8544-s004.xlsx]

## Sheet: Input genome assemblies
Enterococcus faecalis assembly accession	Enterococcus faecium assembly accession	Pediococcus acidilactici assembly accession / FAM number	Pediococcus pentosaceus assembly accession / FAM number
GCF_000393635.1	GCF_900178755.1	GCF_000146325.1	GCF_000014505.1
GCF_000395075.1	GCF_900178835.1	GCF_000163095.1	GCF_000285875.1
GCF_001055135.1	GCF_900178625.1	GCF_000380265.1	GCF_000496265.1
GCF_000205205.1	GCF_000395485.1	GCF_001437115.1	GCF_000708635.1
GCF_000391085.1	GCF_001543825.1	GCF_001767275.1	GCF_001411765.2
GCF_000717435.1	GCF_003320475.1	GCF_001922325.1	GCF_001437285.1
GCF_000415085.1	GCF_900180325.1	GCF_002173575.1	GCF_001593095.1
GCF_000163795.1	GCF_003320655.1	GCF_002173595.1	GCF_001748065.1
GCF_001056625.1	GCF_900180165.1	GCF_002174215.1	GCF_002173535.1
GCF_000148105.1	GCF_900178715.1	FAM13473	GCF_002202155.1
GCF_000159655.1	GCF_000322465.1	FAM13875	GCF_002724015.1
GCF_000396665.1	GCF_003320495.1	FAM13875p	GCF_002982155.1
GCF_000407045.1	GCF_000391805.1	FAM13877	GCF_003429405.1
GCF_000393475.1	GCF_002158285.1	FAM13881	GCF_900454755.1
GCF_000393555.1	GCF_900179445.1	FAM1430	FAM13073
GCF_000148005.1	GCF_000295395.2	FAM17411	FAM17622
GCF_000391465.1	GCF_002141195.1	FAM17418	FAM18321
GCF_000393035.1	GCF_001953255.1	FAM17419c1	FAM18327
GCF_000294265.2	GCF_000395705.1	FAM17419c2	FAM18813
GCF_001055475.1	GCF_002997315.1	FAM17419c2i0	FAM19080
GCF_000788175.1	GCF_002562865.1	FAM17419c4	FAM19083
GCF_000519725.1	GCF_000295275.2	FAM17420c1	FAM19086
GCF_000392855.1	GCF_002848725.1	FAM17420c1i0	FAM19132
GCF_001055055.1	GCF_900179335.1	FAM17420c2	FAM19132p
GCF_000395115.1	GCF_003319985.1	FAM17422	FAM19144
GCF_001053015.1	GCF_000396885.1	FAM17644	FAM19169
GCF_000394175.1	GCF_900180185.1	FAM17644i0	FAM20650
GCF_002220885.1	GCF_900148565.1	FAM17656
GCF_000147475.1	GCF_000396825.1	FAM17656i0
GCF_000395095.1	GCF_002141335.1	FAM17708
GCF_000519605.1	GCF_900179055.1	FAM17708i0
GCF_000148245.1	GCF_002140955.1	FAM18098
GCF_000396425.1	GCF_900178555.1	FAM18098p
GCF_000392875.1	GCF_003320555.1	FAM18964
GCF_000394995.1	GCF_900143475.1	FAM18969
GCF_000393175.1	GCF_000395685.1	FAM18986
GCF_000393535.1	GCF_003320325.1	FAM18987
GCF_000294245.2	GCF_000392105.1	FAM18988
GCF_000395015.1	GCF_900178685.1	FAM19071
GCF_001886675.1	GCF_000294935.2	FAM19133
GCF_000393015.1	GCF_001543585.1	FAM19134
GCF_000148445.1	GCF_900179625.1	FAM19135
GCF_000147925.1	GCF_900179325.1	FAM19136
GCF_000788155.1	GCF_900178665.1	FAM19137
GCF_000147295.1	GCF_001587115.1	FAM19138
GCF_000390745.1	GCF_900179235.1	FAM19139
GCF_000394815.1	GCF_000396945.1	FAM19140
GCF_000394875.1	GCF_900179835.1	FAM19141
GCF_000390505.1	GCF_900179545.1	FAM19142
GCF_001878735.1	GCF_900179905.1	FAM19148
GCF_000508705.1	GCF_900180295.1	FAM19149
GCF_001058065.1	GCF_000395865.1	FAM19150
GCF_000394235.1	GCF_900143345.1	FAM19151
GCF_000393095.1	GCF_000394715.1	FAM19152
GCF_000148305.1	GCF_002140865.1	FAM19153
GCF_000415465.2	GCF_900180125.1	FAM19154
GCF_001931845.1	GCF_000394435.1	FAM19155
GCF_000396065.1	GCF_000294815.2	FAM19156
GCF_000148225.1	GCF_900178955.1	FAM19157
GCF_000393395.1	GCF_002141355.1	FAM19158
GCF_000519825.1	GCF_900178745.1	FAM19159
GCF_000390965.1	GCF_001721085.1	FAM19160
GCF_000396005.1	GCF_900178705.1	FAM19180
GCF_000519545.1	GCF_000394635.1	FAM19324
GCF_000157175.1	GCF_001543575.1	FAM19390
GCF_000391145.1	GCF_900178775.1	FAM19393
GCF_000394195.1	GCF_000295335.2	FAM19460
GCF_000211255.1	GCF_002777275.1	FAM19461
GCF_000394275.1	GCF_900178945.1	FAM19462
GCF_001053375.1	GCF_002630985.1	FAM19464
GCF_000394315.1	GCF_000294835.2	FAM19466
GCF_001056125.1	GCF_001996345.1	FAM19475
GCF_000396985.1	GCF_003320245.1	FAM19476
GCF_000147555.1	GCF_000322165.1	FAM19488
GCF_000393795.1	GCF_002141255.1	FAM19500
GCF_000391165.1	GCF_900178905.1	FAM19598
GCF_001054535.1	GCF_002158275.1	FAM19612
GCF_001057435.1	GCF_000395565.1	FAM19614
GCF_000393715.1	GCF_900179075.1	FAM19619
GCF_000157155.1	GCF_000393435.1	FAM19641
GCF_000394915.1	GCF_000393675.1	FAM19651
GCF_000519785.1	GCF_002442315.1	FAM19701
GCF_000394455.1	GCF_900180205.1	FAM19852
GCF_002140335.1	GCF_000321705.1	FAM19879
GCF_900143365.1	GCF_003320165.1	FAM19882
GCF_001055935.1	GCF_001543565.1	FAM19953
GCF_000396165.1	GCF_003320365.1	FAM19955
GCF_000157375.1	GCF_900179185.1	FAM20059
GCF_000157495.1	GCF_001990575.1	FAM20072
GCF_000159275.1	GCF_900179405.1	FAM20284
GCF_000391305.1	GCF_000295355.2	FAM20293
GCF_001594365.1	GCF_000322385.1	FAM20301
GCF_000395175.1	GCF_003320075.1	FAM20303
GCF_000391345.1	GCF_900179475.1	FAM20310
GCF_000147495.1	GCF_900178805.1	FAM20325
GCF_000394795.1	GCF_002562875.1	FAM20497
GCF_000294145.2	GCF_000322005.1	FAM20521
GCF_001989555.1	GCF_000394535.1	FAM20547
GCF_000392775.1	GCF_003020705.1	FAM20547i0
GCF_000519905.1	GCF_003320505.1	FAM20551
GCF_000147215.1	GCF_000391825.1	FAM20552
GCF_002861295.1	GCF_900143385.1	FAM20553
GCF_000394375.1	GCF_900180245.1	FAM20555
GCF_000390685.1	GCF_000395925.1	FAM20556
GCF_000393235.1	GCF_900178995.1	FAM20557
GCF_000172575.2	GCF_002025045.1	FAM20557i0
GCF_900205805.1	GCF_900179615.1	FAM20559
GCF_001598635.1	GCF_002909305.1	FAM20559i0
GCF_000396565.1	GCF_900180035.1	FAM20560
GCF_000415005.1	GCF_000396685.1	FAM20561
GCF_000396605.1	GCF_000397045.1	FAM20562
GCF_000163815.1	GCF_000321545.1	FAM20579
GCF_002141395.1	GCF_900179775.1	FAM20580
GCF_000281195.1	GCF_000322305.1	FAM20620
GCF_001055725.1	GCF_002442445.1	FAM20622
GCF_001054585.1	GCF_000321605.1	FAM20623
GCF_000396225.1	GCF_002141115.1	FAM20624
GCF_001053475.1	GCF_900179795.1	FAM20624i0
GCF_000391205.1	GCF_000321485.1	FAM22132
GCF_000147575.1	GCF_000411035.1	FAM22234
GCF_000294305.2	GCF_000392045.1	FAM22235
GCF_000415225.1	GCF_900179045.1	FAM22257
GCF_001052275.1	GCF_001543735.1	FAM22258
GCF_000390845.1	GCF_000390485.1	FAM22259
GCF_000392675.1	GCF_003320575.1	FAM22260
GCF_000148045.1	GCF_002140735.1	FAM22261
GCF_900205785.1	GCF_000392005.1	FAM22262
GCF_000396345.1	GCF_900179265.1
GCF_001055025.1	GCF_000295135.2
GCF_000415125.1	GCF_002973715.1
GCF_000395305.1	GCF_003320115.1
GCF_001057765.1	GCF_001543795.1
GCF_000396305.1	GCF_002140535.1
GCF_000393495.1	GCF_002761275.1
GCF_000390925.1	GCF_900179695.1
GCF_000390885.1	GCF_900179455.1
GCF_000294005.2	GCF_000392025.1
GCF_000395265.1	GCF_000322365.1
GCF_000396445.1	GCF_900178575.1
GCF_000160155.1	GCF_000322045.1
GCF_000394935.1	GCF_002158365.1
GCF_000390945.1	GCF_002141035.1
GCF_002140345.1	GCF_900179585.1
GCF_001055675.1	GCF_900179885.1
GCF_002355755.1	GCF_000321725.1
GCF_001053515.1	GCF_002880635.1
GCF_000393515.1	GCF_000295555.2
GCF_000396485.1	GCF_000394755.1
GCF_002141415.1	GCF_000321525.1
GCF_000519525.1	GCF_000322345.1
GCF_001054775.1	GCF_000392315.1
GCF_000519505.1	GCF_003320275.1
GCF_001056555.1	GCF_900178795.1
GCF_000294165.2	GCF_900179555.1
GCF_000390665.1	GCF_001721905.1
GCF_000391325.1	GCF_003320795.1
GCF_000394955.1	GCF_000174395.2
GCF_000391285.1	GCF_003319975.1
GCF_000393595.1	GCF_001543555.1
GCF_000157315.1	GCF_000322145.1
GCF_000396285.1	GCF_900179635.1
GCF_000157455.1	GCF_000322085.1
GCF_000394895.1	GCF_001696305.1
GCF_000395135.1	GCF_900179095.1
GCF_000396145.1	GCF_900179645.1
GCF_000393575.1	GCF_900179605.1
GCF_000479085.1	GCF_900178965.1
GCF_000396385.1	GCF_001720945.1
GCF_000390985.1	GCF_000250945.1
GCF_000148185.1	GCF_900148705.1
GCF_000396625.1	GCF_002761255.1
GCF_000396205.1	GCF_000395525.1
GCF_000147595.1	GCF_900179845.1
GCF_000391665.1	GCF_000397005.1
GCF_000415445.2	GCF_900180235.1
GCF_000479105.1	GCF_900179595.1
GCF_000415425.2	GCF_000391785.1
GCF_000391645.1	GCF_001635875.1
GCF_000391005.1	GCF_000294995.2
GCF_000394255.1	GCF_003320455.1
GCF_000157475.1	GCF_002025065.1
GCF_001054785.1	GCF_003320135.1
GCF_000396585.1	GCF_003320665.1
GCF_000396105.1	GCF_900179245.1
GCF_000415405.1	GCF_900179375.1
GCF_001057625.1	GCF_000394735.1
GCF_000391225.1	GCF_002140435.1
GCF_000519925.1	GCF_000322425.1
GCF_000519685.1	GCF_900148595.1
GCF_000391525.1	GCF_000394675.1
GCF_002140985.1	GCF_000321585.1
GCF_001056735.1	GCF_900179765.1
GCF_000394095.1	GCF_003269465.1
GCF_000391565.1	GCF_002140595.1
GCF_000392835.1	GCF_900179065.1
GCF_000391405.1	GCF_001298485.1
GCF_000392935.1	GCF_900143355.1
GCF_000690925.1	GCF_002141135.1
GCF_000395405.1	GCF_000321965.1
GCF_000396245.1	GCF_000295155.2
GCF_000393455.1	GCF_000322205.1
GCF_000519485.1	GCF_002158355.1
GCF_000294125.1	GCF_900179365.1
GCF_000390585.1	GCF_900066025.1
GCF_000390805.1	GCF_002141175.1
GCF_000394335.1	GCF_900178875.1
GCF_000393315.1	GCF_002140255.1
GCF_002163735.1	GCF_000322065.1
GCF_000395055.1	GCF_002630975.1
GCF_000394355.1	GCF_001990615.1
GCF_000393075.1	GCF_900179225.1
GCF_000392895.1	GCF_003320405.1
GCF_000394075.1	GCF_000321925.1
GCF_000395245.1	GCF_000407345.1
GCF_000148065.1	GCF_002140555.1
GCF_000519565.1	GCF_000415305.1
GCF_000393215.1	GCF_000336405.1
GCF_000396365.1	GCF_000396705.1
GCF_000393335.1	GCF_000396845.1
GCF_000147515.1	GCF_900044005.1
GCF_000394395.1	GCF_900180465.1
GCF_000519705.1	GCF_000295455.2
GCF_000519665.1	GCF_002140475.1
GCF_000393615.1	GCF_900178985.1
GCF_000415245.2	GCF_000322325.1
GCF_001057145.1	GCF_002140375.1
GCF_001689055.2	GCF_900148725.1
GCF_000391025.1	GCF_900092475.1
GCF_000519965.1	GCF_000321945.1
GCF_000392755.1	GCF_900143405.1
GCF_000148085.1	GCF_000322245.1
GCF_000390825.1	GCF_900179155.1
GCF_000007785.1	GCF_000395545.1
GCF_000391485.1	GCF_000394415.1
GCF_002221625.2	GCF_900179755.1
GCF_000393355.1	GCF_000295515.2
GCF_000148125.1	GCF_003071445.1
GCF_002141205.1	GCF_003320695.1
GCF_000396865.1	GCF_000295615.2
GCF_000393275.1	GCF_900179855.1
GCF_000396645.1	GCF_000393775.1
GCF_900148545.1	GCF_000407105.1
GCF_000519845.1	GCF_002140315.1
GCF_000396265.1	GCF_002140455.1
GCF_000396325.1	GCF_000392165.1
GCF_000393155.1	GCF_900178595.1
GCF_000391045.1	GCF_900148525.1
GCF_000390525.1	GCF_001895905.1
GCF_000391425.1	GCF_000415285.2
GCF_001639005.2	GCF_003320815.1
GCF_000391385.1	GCF_000395745.1
GCF_000394135.1	GCF_002216245.1
GCF_000394775.1	GCF_000321805.1
GCF_001055955.1	GCF_900143375.1
GCF_000396085.1	GCF_002158435.1
GCF_000390705.1	GCF_000321665.1
GCF_000391105.1	GCF_000396745.1
GCF_000294085.2	GCF_900178735.1
GCF_000393255.1	GCF_003320055.1
GCF_001053455.1	GCF_900179415.1
GCF_000157135.1	GCF_000393695.1
GCF_000395385.1	GCF_000396785.1
GCF_000390865.1	GCF_001750885.1
GCF_000294285.2	GCF_002174445.1
GCF_000157415.1	GCF_000262105.1
GCF_000788235.1	GCF_000321985.1
GCF_000147535.1	GCF_900178935.1
GCF_000391705.1	GCF_900179725.1
GCF_900205855.1	GCF_000322265.1
GCF_000391445.1	GCF_002973675.1
GCF_000294025.2	GCF_900179385.1
GCF_000395285.1	GCF_900179105.1
GCF_002110405.1	GCF_900180115.1
GCF_000147255.1	GCF_000295415.2
GCF_000148165.1	GCF_900179255.1
GCF_000414985.1	GCF_002997345.1
GCF_000390725.1	GCF_000294895.2
GCF_000392955.1	GCF_900178785.1
GCF_000391185.1	GCF_000322405.1
GCF_002006705.1	GCF_900180195.1
GCF_000391545.1	GCF_000295575.2
GCF_000147985.1	GCF_900180175.1
GCF_000396405.1	GCF_000295375.2
GCF_000390545.1	GCF_001543675.1
GCF_000396185.1	GCF_900179925.1
GCF_000391365.1	GCF_900178645.1
GCF_000148205.1	GCF_900179785.1
GCF_001057835.1	GCF_003020725.1
GCF_000519585.1	GCF_900179575.1
GCF_000394835.1	GCF_002442475.1
GCF_000396125.1	GCF_000395785.1
GCF_000395365.1	GCF_900179215.1
GCF_002140075.1	GCF_000395765.1
GCF_000393055.1	GCF_000322445.1
GCF_000391725.1	GCF_900178855.1
GCF_000390765.1	GCF_900180025.1
GCF_000161875.1	GCF_900179535.1
GCF_001054705.1	GCF_001886635.1
GCF_000788165.1	GCF_002006745.1
GCF_001055875.1	GCF_001543665.1
GCF_000519465.1	GCF_900179195.1
GCF_000519445.1	GCF_000295075.2
GCF_000390645.1	GCF_000397025.1
GCF_000519865.1	GCF_003320355.1
GCF_001055395.1	GCF_000411015.1
GCF_000393295.1	GCF_000415265.2
GCF_000415105.1	GCF_001720965.1
GCF_000393195.1	GCF_001622975.1
GCF_000390565.1	GCF_003020765.1
GCF_000294205.2	GCF_000321845.1
GCF_001057475.1	GCF_002848625.1
GCF_000390905.1	GCF_000295255.2
GCF_000519805.1	GCF_900179395.1
GCF_000394515.1	GCF_000390465.1
GCF_000519645.1	GCF_001543745.1
GCF_002814115.1	GCF_900179565.1
GCF_001692705.1	GCF_003020685.1
GCF_000294225.2	GCF_003320415.1
GCF_000391625.1	GCF_000392125.1
GCF_000391605.1	GCF_000294875.2
GCF_000395205.1	GCF_000415365.1
GCF_000294185.2	GCF_900179675.1
GCF_000391505.1	GCF_001543765.1
GCF_000396545.1	GCF_000321625.1
GCF_000391685.1	GCF_001543645.1
GCF_000394215.1	GCF_002442955.1
GCF_000519765.1	GCF_000321885.1
GCF_000519885.1	GCF_001990565.1
GCF_000147455.1	GCF_003320715.1
GCF_000157275.1	GCF_002562815.1
GCF_000788185.1	GCF_900178675.1
GCF_000294325.2	GCF_002562805.1
GCF_000157335.1	GCF_900178565.1
GCF_000396465.1	GCF_000321505.1
GCF_000395035.1	GCF_002007625.1
GCF_000294065.2	GCF_000395885.1
GCF_000479065.1	GCF_001721025.1
GCF_000392975.1	GCF_001720985.1
GCF_000392915.1	GCF_900178695.1
GCF_000293985.2	GCF_000322105.1
GCF_000392795.1	GCF_003320595.1
GCF_000519425.1	GCF_900148665.1
GCF_000395985.1	GCF_000321745.1
GCF_001563075.1	GCF_900179945.1
GCF_000519625.1	GCF_002158295.1
GCF_000396045.1	GCF_000321565.1
GCF_000396025.1	GCF_000395725.1
GCF_000396505.1	GCF_900180145.1
GCF_000393115.1	GCF_900179715.1
GCF_000294045.1	GCF_002442275.1
GCF_001056075.1	GCF_900179915.1
GCF_000390785.1	GCF_003320775.1
GCF_000391265.1	GCF_000295435.2
GCF_000391245.1	GCF_000313195.1
GCF_000317915.1	GCF_900179285.1
GCF_000393135.1	GCF_003320315.1
GCF_000147275.1	GCF_002894565.1
GCF_000407305.1	GCF_900179505.1
GCF_000391065.1	GCF_002848665.1
GCF_000157235.1	GCF_000295595.2
GCF_000394155.1	GCF_000391745.1
GCF_000519745.1	GCF_900180045.1
GCF_000394115.1	GCF_003320155.1
GCF_000394295.1	GCF_900179485.1
GCF_000392995.1	GCF_000295175.2
GCF_002140925.1	GCF_003071425.1
GCF_000391585.1	GCF_000295315.2
GCF_000415065.1	GCF_000393755.1
GCF_000415045.1	GCF_002024245.1
GCF_000148265.1	GCF_900179895.1
GCF_000392815.1	GCF_900179125.1
GCF_000415205.1	GCF_002334625.1
GCF_000393375.1	GCF_002848385.1
GCF_900205835.1	GCF_900179115.1
GCF_000394855.1	GCF_002158325.1
GCF_000396905.1	GCF_000321825.1
GCF_000391125.1	GCF_900179935.1
GCF_002110435.1	GCF_000415345.1
GCF_000519945.1	GCF_003320395.1
GCF_001055435.1	GCF_002140415.1
GCF_000157515.1	GCF_000395845.1
GCF_000394975.1	GCF_900180155.1
GCF_000159255.1	GCF_001721105.1
GCF_000742975.1	GCF_900180015.1
GCF_000294105.2	GCF_900178585.1
GCF_000788255.1	GCF_900179525.1
GCF_002088065.1	GCF_000313155.1
GCF_000396525.1	GCF_000392195.1
GCF_000415025.1	GCF_000394555.1
GCF_000550745.1	GCF_003320855.1
	GCF_001542895.1
	GCF_900179735.1
	GCF_900179435.1
	GCF_001953235.1
	GCF_001990605.1
	GCF_000395625.1
	GCF_900180275.1
	GCF_002141005.1
	GCF_001546375.1
	GCF_900179965.1
	GCF_000395465.1
	GCF_002973685.1
	GCF_000258325.1
	GCF_002158385.1
	GCF_000392145.1
	GCF_002141125.1
	GCF_000321865.1
	GCF_000393735.1
	GCF_900178765.1
	GCF_000391885.1
	GCF_000395905.1
	GCF_002140215.1
	GCF_001543835.1
	GCF_000395965.1
	GCF_900178845.1
	GCF_000396765.1
	GCF_002141075.1
	GCF_002174435.1
	GCF_000392085.1
	GCF_003320195.1
	GCF_002848705.1
	GCF_900179145.1
	GCF_000321645.1
	GCF_000322285.1
	GCF_000392215.1
	GCF_002158375.1
	GCF_003320805.1
	GCF_000392065.1
	GCF_000395445.1
	GCF_001696285.1
	GCF_000395805.1
	GCF_900178635.1
	GCF_001721065.1
	GCF_000391965.1
	GCF_000294915.2
	GCF_000396725.1
	GCF_001696275.1
	GCF_000295195.2
	GCF_000294345.2
	GCF_000396805.1
	GCF_000395665.1
	GCF_900179865.1
	GCF_001518735.1
	GCF_002850515.1
	GCF_000322225.1
	GCF_900179295.1
	GCF_900178655.1
	GCF_003320485.1
	GCF_002140515.1
	GCF_000395945.1
	GCF_001676845.1
	GCF_900180285.1
	GCF_000394595.1
	GCF_900179985.1
	GCF_000394475.1
	GCF_000295055.2
	GCF_000295535.2
	GCF_003320215.1
	GCF_000321785.1
	GCF_002562855.1
	GCF_002761555.1
	GCF_900178825.1
	GCF_002174355.1
	GCF_900143335.1
	GCF_900180455.1
	GCF_900179015.1
	GCF_000394695.1
	GCF_000395645.1
	GCF_900148685.1
	GCF_000391865.1
	GCF_003320255.1
	GCF_000407325.1
	GCF_900178915.1
	GCF_900143455.1
	GCF_900178895.1
	GCF_900179135.1
	GCF_900178605.1
	GCF_002973755.1
	GCF_002973795.1
	GCF_000395585.1
	GCF_900179705.1
	GCF_000322125.1
	GCF_000321685.1
	GCF_000294975.2
	GCF_000393415.1
	GCF_000393855.1
	GCF_002140895.1
	GCF_002158445.1
	GCF_000391905.1
	GCF_002631165.1
	GCF_000396965.1
	GCF_900180265.1
	GCF_002140385.1
	GCF_003320585.1
	GCF_900179515.1
	GCF_900178975.1
	GCF_000391985.1
	GCF_002848685.1
	GCF_000407085.1
	GCF_000295035.2
	GCF_002831505.1
	GCF_002591965.2
	GCF_002140295.1
	GCF_000395425.1
	GCF_000295115.2
	GCF_003320635.1
	GCF_000322185.1
	GCF_000321765.1
	GCF_000294955.2
	GCF_000294855.2
	GCF_900179305.1
	GCF_900179975.1
	GCF_002141435.1
	GCF_900179025.1
	GCF_900179425.1
	GCF_900180085.1
	GCF_001412695.1
	GCF_900180135.1
	GCF_900179345.1
	GCF_000391945.1
	GCF_001582105.1
	GCF_000295495.2
	GCF_000396925.1
	GCF_001543715.1
	GCF_002848645.1
	GCF_000394495.1
	GCF_001582095.1
	GCF_000322025.1
	GCF_000394655.1
	GCF_000395825.1
	GCF_000391925.1
	GCF_000394575.1
	GCF_002265255.1
	GCF_000395505.1
	GCF_900179465.1
	GCF_002848745.1
	GCF_001721005.1
	GCF_003202445.1
	GCF_900179655.1
	GCF_900179175.1
	GCF_900178885.1
	GCF_900178815.1
	GCF_900178615.1
	GCF_003320755.1
	GCF_000391845.1
	GCF_002983785.1
	GCF_900178925.1
	GCF_900179315.1
	GCF_000395605.1
	GCF_900178725.1
	GCF_900178865.1
	GCF_001592725.1
	GCF_900179165.1
	GCF_900179685.1
	GCF_900179745.1
	GCF_900179665.1
	GCF_900180305.1
	GCF_002894545.1
	GCF_900179085.1
	GCF_900179995.1
	GCF_000295215.2
	GCF_003320235.1
	GCF_000321905.1
	GCF_003320735.1
	GCF_002803675.1
	GCF_000295235.2
	GCF_002630965.1
	GCF_000321465.1
	GCF_003020745.1
	GCF_900148715.1
	GCF_003320065.1
	GCF_000407065.1
	GCF_900180075.1
	GCF_001543635.1
	GCF_002140805.1

## Sheet: Negative set genome assemblies
Accession	Species	Strain	Assembly level	RefSeq category
GCF_001441165.1	Acidipropionibacterium acidipropionici	CGMCC 1.2230	Complete Genome	representative genome
GCF_000425285.1	Acidipropionibacterium jensenii DSM 20535	DSM 20535	Scaffold	representative genome
GCF_000423445.1	Acidipropionibacterium thoenii DSM 20276	DSM 20276	Scaffold	representative genome
GCF_000746645.1	Acinetobacter baumannii	AB030	Complete Genome	representative genome
GCF_001484935.1	Acinetobacter johnsonii XBB1	XBB1	Complete Genome	representative genome
GCF_000368025.1	Acinetobacter parvus DSM 16617 = CIP 108168	CIP 108168	Scaffold	representative genome
GCF_001543285.1	Aerococcus viridans	CCUG4311	Complete Genome	representative genome
GCF_900163565.1	Agrococcus casei LMG 22410	LMG 22410	Contig	representative genome
GCF_000967305.2	Alcaligenes faecalis	ZD02	Complete Genome	representative genome
GCF_000238915.1	Arthrobacter globiformis NBRC 12137	NBRC 12137	Contig	representative genome
GCF_000374565.1	Bacillus fordii DSM 16014 = CIP 108821	DSM 16014	Scaffold	representative genome
GCF_001578205.1	Bacillus pumilus	SH-B9	Complete Genome	representative genome
GCF_000187895.1	Bacteroides plebeius DSM 17135	DSM 17135	Scaffold	representative genome
GCF_000421665.1	Bavariicoccus seileri DSM 19936	DSM 19936	Contig	representative genome
GCF_000010425.1	Bifidobacterium adolescentis ATCC 15703	ATCC 15703	Complete Genome	representative genome
GCF_001025175.1	Bifidobacterium breve DSM 20213 = JCM 1192	JCM 1192	Complete Genome	representative genome
GCF_000347695.1	Bifidobacterium thermophilum RBL67	RBL67	Complete Genome	representative genome
GCF_001729525.1	Brevibacterium aurantiacum	SMQ-1335	Complete Genome	representative genome
GCF_000314575.1	Brevibacterium casei S18	S18	Contig	representative genome
GCF_001606005.1	Brevibacterium linens	BS258	Complete Genome	representative genome
GCF_000620985.1	Brochothrix thermosphacta DSM 20171 = FSL F6-1036	DSM 20171	Scaffold	representative genome
GCF_000744255.1	Carnobacterium divergens DSM 20623	66	Contig	representative genome
GCF_000317975.2	Carnobacterium maltaromaticum LMA28	LMA28	Complete Genome	representative genome
GCF_000744825.1	Carnobacterium mobile DSM 4848	MT37L	Contig	representative genome
GCF_900108115.1	Chryseobacterium bovis DSM 19482	DSM 19482	Scaffold	representative genome
GCF_000735695.2	Chryseobacterium haifense DSM 19056	DSM 19056	Contig	representative genome
GCF_000737765.1	Chryseobacterium vrystaatense	LMG 22846	Contig	representative genome
GCF_000648515.1	Citrobacter freundii CFNIH1	CFNIH1	Complete Genome	representative genome
GCF_000833105.2	Clostridium beijerinckii	NCIMB 14988	Complete Genome	representative genome
GCF_000020165.1	Clostridium botulinum B str. Eklund 17B (NRP)	Eklund 17B	Complete Genome	representative genome
GCF_000204565.1	Clostridium botulinum BKT015925	BKT015925	Complete Genome	representative genome
GCF_001456065.2	Clostridium butyricum	KNU-L09	Complete Genome	representative genome
GCF_001405015.1	Clostridium disporicum	2789STDY5834856	Scaffold	representative genome
GCF_001642655.1	Clostridium tyrobutyricum	KCTC 5387	Complete Genome	representative genome
GCF_001941425.1	Corynebacterium ammoniagenes DSM 20306	DSM 20306 = 9.6	Complete Genome	representative genome
GCF_000183325.1	Corynebacterium bovis DSM 20582 = CIP 54.80	DSM 20582	Contig	representative genome
GCF_000550785.1	Corynebacterium casei LMG S-19264	LMG S-19264	Complete Genome	representative genome
GCF_001941465.1	Corynebacterium flavescens	OJ8	Complete Genome	representative genome
GCF_001941345.1	Corynebacterium stationis	622=DSM 20302	Complete Genome	representative genome
GCF_000720035.1	Corynebacterium variabile	NRRL B-4201	Contig	representative genome
GCF_000179395.2	Corynebacterium variabile DSM 44702	DSM 44702	Complete Genome	representative genome
GCF_000008345.1	Cutibacterium acnes KPA171202	KPA171202	Complete Genome	representative genome
GCF_000018665.1	Delftia acidovorans SPH-1	SPH-1	Complete Genome	representative genome
GCF_001630765.1	Dietzia maris	DSM 43672	Contig	representative genome
GCF_000157355.2	Enterococcus casseliflavus EC20	EC20	Complete Genome	representative genome
GCF_000407545.1	Enterococcus gilvus ATCC BAA-350	ATCC BAA-350	Contig	representative genome
GCF_000271405.2	Enterococcus hirae ATCC 9790	ATCC 9790	Complete Genome	representative genome
GCF_000185365.1	Enterococcus italicus DSM 15952	DSM 15952	Scaffold	representative genome
GCF_000407185.1	Enterococcus malodoratus ATCC 43197	ATCC 43197	Scaffold	representative genome
GCF_001544295.1	Enterococcus pseudoavium NBRC 100491	NBRC 100491	Contig	representative genome
GCF_000019905.1	Exiguobacterium sibiricum 255-15	255-15	Complete Genome	representative genome
GCF_000197735.1	Glutamicibacter arilaitensis Re117	Re117	Complete Genome	representative genome
GCF_000154445.1	Intestinibacter bartlettii DSM 16795	DSM 16795	Scaffold	representative genome
GCF_000425845.1	Jeotgalicoccus psychrophilus DSM 19085	DSM 19085	Scaffold	representative genome
GCF_001022195.1	Klebsiella oxytoca	CAV1374	Complete Genome	representative genome
GCF_001275345.1	Kocuria palustris	MU14/1	Complete Genome	representative genome
GCF_000010285.1	Kocuria rhizophila DC2201	DC2201 (= NBRC 103217)	Complete Genome	representative genome
GCF_900116935.1	Lactobacillus acidipiscis	ACA-DC 1533	Complete Genome	representative genome
GCF_002075105.1	Lactobacillus amylolyticus	L6	Complete Genome	representative genome
GCF_001936335.1	Lactobacillus amylophilus DSM 20533 = JCM 1125	DSM 20533	Complete Genome	representative genome
GCF_000014465.1	Lactobacillus brevis ATCC 367	ATCC 367	Complete Genome	representative genome
GCF_000298115.2	Lactobacillus buchneri CD034	CD034	Complete Genome	representative genome
GCF_001433765.1	Lactobacillus coryniformis subsp. coryniformis KCTC 3167 = DSM 20001	DSM 20001	Scaffold	representative genome
GCF_002224425.1	Lactobacillus curvatus	MRS6	Complete Genome	representative genome
GCF_000056065.1	Lactobacillus delbrueckii subsp. bulgaricus ATCC 11842 = JCM 1002	ATCC 11842	Complete Genome	representative genome
GCF_001436095.1	Lactobacillus dextrinicus DSM 20335	DSM 20335	Scaffold	representative genome
GCF_000010145.1	Lactobacillus fermentum IFO 3956	IFO 3956	Complete Genome	representative genome
GCF_001314245.2	Lactobacillus gallinarum	HFD4	Complete Genome	representative genome
GCF_000014425.1	Lactobacillus gasseri ATCC 33323 = JCM 1131	ATCC 33323	Complete Genome	representative genome
GCF_001436415.1	Lactobacillus graminis DSM 20719	DSM 20719	Scaffold	representative genome
GCF_000425885.1	Lactobacillus harbinensis DSM 16991	DSM 16991	Scaffold	representative genome
GCF_001308285.1	Lactobacillus helveticus	CAUH18	Complete Genome	representative genome
GCF_000615905.1	Lactobacillus nodensis DSM 19682 = JCM 14932 = NBRC 107160	JCM 14932	Contig	representative genome
GCF_001434315.1	Lactobacillus oligofermentans DSM 15707 = LMG 22743	DSM 15707	Scaffold	representative genome
GCF_000383435.1	Lactobacillus parabrevis ATCC 53295	RODS-DW	Scaffold	representative genome
GCF_001922025.1	Lactobacillus parabuchneri	FAM21731	Complete Genome	representative genome
GCF_000829035.1	Lactobacillus paracasei subsp. paracasei JCM 8130	JCM 8130	Complete Genome	representative genome
GCF_001311355.1	Lactobacillus parafarraginis DSM 18390 = JCM 14109	JCM 14109	Contig	representative genome
GCF_001435585.1	Lactobacillus perolens DSM 12744	DSM 12744	Contig	representative genome
GCF_000026505.1	Lactobacillus rhamnosus GG	GG (ATCC 53103)	Complete Genome	representative genome
GCF_002224565.1	Lactobacillus sakei	FAM18311	Complete Genome	representative genome
GCF_001435195.1	Lactobacillus satsumensis DSM 16230 = JCM 12392	DSM 16230	Scaffold	representative genome
GCF_001434665.1	Lactobacillus tucceti DSM 20183	DSM 20183	Scaffold	representative genome
GCF_001436295.1	Lactobacillus vaccinostercus DSM 20634	DSM 20634	Scaffold	representative genome
GCF_000269925.1	Lactococcus garvieae ATCC 49156	ATCC 49156	Complete Genome	representative genome
GCF_000834055.1	Leucobacter komagatae	VKM ST2845	Contig	representative genome
GCF_000300135.1	Leuconostoc carnosum JB16	JB16	Complete Genome	representative genome
GCF_000026405.1	Leuconostoc citreum KM20	KM20	Complete Genome	representative genome
GCF_001698145.1	Leuconostoc lactis	WiKim40	Complete Genome	representative genome
GCF_000014445.1	Leuconostoc mesenteroides subsp. mesenteroides ATCC 8293	ATCC 8293	Complete Genome	representative genome
GCF_000686505.1	Leuconostoc pseudomesenteroides PS12	PS12	Scaffold	representative genome
GCF_900101525.1	Marinilactibacillus psychrotolerans	DSM 19582	Contig	representative genome
GCF_000092125.1	Meiothermus silvanus DSM 9946	DSM 9946	Complete Genome	representative genome
GCF_000956415.1	Microbacterium foliorum	DSM 12966	Contig	representative genome
GCF_000422745.1	Microbacterium gubbeenense DSM 15944	DSM 15944	Scaffold	representative genome
GCF_000956525.1	Microbacterium oxydans	BEL4b	Contig	representative genome
GCF_900095745.1	Microbacterium oxydans		Contig	representative genome
GCF_000023205.1	Micrococcus luteus NCTC 2665	NCTC 2665	Complete Genome	representative genome
GCF_001553955.1	Moraxella osloensis	CCUG 350	Complete Genome	representative genome
GCF_000286435.2	Morganella morganii subsp. morganii KT		Complete Genome	representative genome
GCF_001676155.1	Morganella psychrotolerans	GCSL-P101	Contig	representative genome
GCF_000183135.1	Paludibacter propionicigenes WB4	WB4	Complete Genome	representative genome
GCF_001709315.1	Pantoea agglomerans	C410P1	Complete Genome	representative genome
GCF_001767275.1	Pediococcus acidilactici	ZPA017	Complete Genome	representative genome
GCF_000014505.1	Pediococcus pentosaceus ATCC 25745	ATCC 25745	Complete Genome	representative genome
GCF_001437075.1	Pediococcus stilesii	DSM 18001	Contig	representative genome
GCF_000379925.1	Porphyromonas levii DSM 23370	DSM 23370	Scaffold	representative genome
GCF_000940845.1	Propionibacterium freudenreichii subsp. freudenreichii	DSM 20271	Complete Genome	representative genome
GCF_000314875.2	Providencia alcalifaciens Dmel2	Dmel2	Scaffold	representative genome
GCF_900061445.1	Providencia heimbachae	P12672	Contig	representative genome
GCF_900014995.1	Pseudoclavibacter helvolus	G8	Contig	representative genome
GCF_000237065.1	Pseudomonas fluorescens F113	F113	Complete Genome	representative genome
GCF_000800615.1	Pseudomonas putida	PA14H7	Scaffold	representative genome
GCF_000312425.1	Reyranella massiliensis 521	521	Scaffold	representative genome
GCF_900114325.1	Rhodanobacter glycinis	MO64	Scaffold	representative genome
GCF_000011025.1	Rothia mucilaginosa DY-18	DY-18	Complete Genome	representative genome
GCF_000513215.1	Serratia marcescens subsp. marcescens Db11	Db11	Complete Genome	representative genome
GCF_001572725.1	Serratia rubidaea	1122	Complete Genome	representative genome
GCF_001028645.1	Staphylococcus capitis subsp. capitis	AYP1020	Complete Genome	representative genome
GCF_000972575.1	Staphylococcus cohnii subsp. cohnii	532	Contig	representative genome
GCF_001432245.1	Staphylococcus equorum	KS1039	Complete Genome	representative genome
GCF_000009865.1	Staphylococcus haemolyticus JCSC1435	JCSC1435	Complete Genome	representative genome
GCF_000183685.1	Staphylococcus hominis subsp. hominis C80	C80	Scaffold	representative genome
GCF_000286395.1	Staphylococcus lentus F1142	F1142	Contig	representative genome
GCF_002209165.2	Staphylococcus sciuri	FDAARGOS_285	Complete Genome	representative genome
GCF_001902315.1	Staphylococcus succinus	14BME20	Complete Genome	representative genome
GCF_000286335.1	Staphylococcus vitulinus F1028	F1028	Contig	representative genome
GCF_000706685.1	Staphylococcus xylosus	HKUOPL8	Complete Genome	representative genome
GCF_000072485.1	Stenotrophomonas maltophilia K279a	K279a	Complete Genome	representative genome
GCF_001704155.1	Stenotrophomonas rhizophila	QL-P4	Complete Genome	representative genome
GCF_000213825.1	Streptococcus parauberis KCTC 11537	KCTC 11537	Complete Genome	representative genome
GCF_000785515.1	Streptococcus salivarius	NCTC 8618	Complete Genome	representative genome
GCF_000253395.1	Streptococcus thermophilus JIM 8232	JIM 8232	Complete Genome	representative genome
GCF_000009545.1	Streptococcus uberis 0140J	0140J	Complete Genome	representative genome
GCF_000283615.1	Tetragenococcus halophilus NBRC 12172	NBRC 12172	Complete Genome	representative genome
GCF_900163795.1	Vagococcus fluvialis bH819	bH819	Contig	representative genome
GCF_000498295.1	Vagococcus lutrae LBD1	LBD1	Scaffold	representative genome
GCF_000426765.1	Vibrio litoralis DSM 17657	DSM 17657	Scaffold	representative genome
GCF_001308145.2	Weissella cibaria	CH2	Complete Genome	representative genome
GCF_000160575.1	Weissella paramesenteroides ATCC 33313	ATCC 33313	Scaffold	representative genome
GCF_000009045.1	Bacillus subtilis subsp. subtilis str. 168	168	Complete Genome	reference genome
GCF_000165905.1	Bifidobacterium bifidum PRL2010	PRL2010	Complete Genome	reference genome
GCF_000007525.1	Bifidobacterium longum NCC2705	NCC2705	Complete Genome	reference genome
GCF_000063585.1	Clostridium botulinum A str. ATCC 3502	ATCC 3502	Complete Genome	reference genome
GCF_000017045.1	Clostridium botulinum A str. Hall	Hall	Complete Genome	reference genome
GCF_000011325.1	Corynebacterium glutamicum ATCC 13032	ATCC 13032	Complete Genome	reference genome
GCF_000007785.1	Enterococcus faecalis V583	V583	Complete Genome	reference genome
GCF_000174395.2	Enterococcus faecium DO	DO	Complete Genome	reference genome
GCF_000026345.1	Escherichia coli IAI39	IAI39	Complete Genome	reference genome
GCF_000299455.1	Escherichia coli O104:H4 str. 2011C-3493	2011C-3493	Complete Genome	reference genome
GCF_000008865.2	Escherichia coli O157:H7 str. Sakai	Sakai substr. RIMD 0509952	Complete Genome	reference genome
GCF_000183345.1	Escherichia coli O83:H1 str. NRG 857C	NRG 857C	Complete Genome	reference genome
GCF_000005845.2	Escherichia coli str. K-12 substr. MG1655	K-12 substr. MG1655	Complete Genome	reference genome
GCF_000026325.1	Escherichia coli UMN026	UMN026	Chromosome	reference genome
GCF_000215745.1	Klebsiella aerogenes KCTC 2190	KCTC 2190	Complete Genome	reference genome
GCF_000011985.1	Lactobacillus acidophilus NCFM	NCFM	Complete Genome	reference genome
GCF_000014525.1	Lactobacillus paracasei ATCC 334	ATCC 334	Complete Genome	reference genome
GCF_000203855.3	Lactobacillus plantarum WCFS1	WCFS1	Complete Genome	reference genome
GCF_000008925.1	Lactobacillus salivarius UCC118	UCC118	Complete Genome	reference genome
GCF_000006865.1	Lactococcus lactis subsp. lactis Il1403	IL1403	Complete Genome	reference genome
GCF_000196035.1	Listeria monocytogenes EGD-e	EGD-e	Complete Genome	reference genome
GCF_000007565.2	Pseudomonas putida KT2440	KT2440	Complete Genome	reference genome
GCF_000013425.1	Staphylococcus aureus subsp. aureus NCTC 8325	NCTC 8325	Complete Genome	reference genome
GCF_000007645.1	Staphylococcus epidermidis ATCC 12228	ATCC 12228	Complete Genome	reference genome
GCF_000007045.1	Streptococcus pneumoniae R6	R6	Complete Genome	reference genome
GCF_000091545.1	Thermus thermophilus HB8	HB8	Complete Genome	reference genome
GCF_002813045.1	Acinetobacter bereziniae	XH901	Complete Genome	na
GCF_000219915.2	Advenella kashmirensis WT001	WT001	Complete Genome	na
GCF_007988865.1	Alkalibacterium kapii	NBRC 103247	Contig	na
GCF_000972685.1	Bacillus altitudinis	W3	Complete Genome	na
GCF_001191605.1	Bacillus altitudinis	GR-8	Complete Genome	na
GCF_001431145.1	Bacillus altitudinis	NJ-M2	Complete Genome	na
GCF_001431785.1	Bacillus altitudinis	NJ-V2	Complete Genome	na
GCF_001700735.1	Bacillus altitudinis	NJ-V	Complete Genome	na
GCF_001908475.1	Bacillus altitudinis	GLB197	Complete Genome	na
GCF_002443015.2	Bacillus altitudinis	SGAir0031	Complete Genome	na
GCF_002741745.1	Bacillus altitudinis	P-10	Complete Genome	na
GCF_004563755.2	Bacillus altitudinis	CHB19	Complete Genome	na
GCF_005849435.1	Bacillus altitudinis	GQYP101	Complete Genome	na
GCF_006007905.1	Bacillus altitudinis	HQ-51-Ba	Complete Genome	na
GCF_001645705.1	Bacillus galactosidilyticus	G25-74	Scaffold	na
GCF_001688645.2	Bifidobacterium animalis subsp. animalis	YL2	Complete Genome	na
GCF_003671995.1	Bifidobacterium animalis subsp. animalis	CNCM I-4602	Complete Genome	na
GCF_000260715.1	Bifidobacterium animalis subsp. animalis ATCC 25527	ATCC 25527	Complete Genome	na
GCF_000818055.1	Bifidobacterium animalis subsp. lactis	BF052	Complete Genome	na
GCF_003390755.1	Bifidobacterium animalis subsp. lactis	S7	Complete Genome	na
GCF_003428375.1	Bifidobacterium animalis subsp. lactis	IDCC4301	Complete Genome	na
GCF_003606305.1	Bifidobacterium animalis subsp. lactis	HN019	Complete Genome	na
GCF_000021425.1	Bifidobacterium animalis subsp. lactis AD011	AD011	Complete Genome	na
GCF_000471945.1	Bifidobacterium animalis subsp. lactis ATCC 27673	ATCC 27673	Complete Genome	na
GCF_000277325.1	Bifidobacterium animalis subsp. lactis B420	B420	Complete Genome	na
GCF_000025245.1	Bifidobacterium animalis subsp. lactis BB-12	BB-12	Complete Genome	na
GCF_000277345.1	Bifidobacterium animalis subsp. lactis Bi-07	Bi-07	Complete Genome	na
GCF_000022705.1	Bifidobacterium animalis subsp. lactis Bl-04	Bl-04; ATCC SD5219	Complete Genome	na
GCF_000414215.1	Bifidobacterium animalis subsp. lactis Bl12	Bl12	Complete Genome	na
GCF_000224965.2	Bifidobacterium animalis subsp. lactis BLC1	BLC1	Complete Genome	na
GCF_000220885.1	Bifidobacterium animalis subsp. lactis CNCM I-2494	CNCM I-2494	Complete Genome	na
GCF_000816205.1	Bifidobacterium animalis subsp. lactis KLDS2.0603	KLDS2.0603	Complete Genome	na
GCF_000092765.1	Bifidobacterium animalis subsp. lactis V9	V9	Complete Genome	na
GCF_000741325.1	Bifidobacterium pseudolongum subsp. pseudolongum	LMG 11571	Contig	na
GCF_002846725.1	Bifidobacterium pseudolongum subsp. pseudolongum	1595B	Contig	na
GCF_002846755.1	Bifidobacterium pseudolongum subsp. pseudolongum	1370B	Contig	na
GCF_004155015.1	Bifidobacterium pseudolongum subsp. pseudolongum	2054B	Contig	na
GCF_004155395.1	Bifidobacterium pseudolongum subsp. pseudolongum	1604B	Contig	na
GCF_004155715.1	Bifidobacterium pseudolongum subsp. pseudolongum	1612B	Contig	na
GCF_004155725.1	Bifidobacterium pseudolongum subsp. pseudolongum	1629B	Contig	na
GCF_004155835.1	Bifidobacterium pseudolongum subsp. pseudolongum	1513B	Contig	na
GCF_000771225.1	Bifidobacterium pseudolongum subsp. pseudolongum DSM 20099	DSM 20099	Contig	na
GCF_002332305.1	Brachybacterium alimentarium	341_9	Scaffold	na
GCF_002332425.1	Brachybacterium alimentarium	908_11	Scaffold	na
GCF_003335265.1	Brachybacterium alimentarium	947_11	Scaffold	na
GCF_003335295.1	Brachybacterium alimentarium	962_10	Scaffold	na
GCF_003335305.1	Brachybacterium alimentarium	900_8	Scaffold	na
GCF_003335315.1	Brachybacterium alimentarium	862_8	Scaffold	na
GCF_003335355.1	Brachybacterium alimentarium	738_10	Scaffold	na
GCF_003335415.1	Brachybacterium alimentarium	876_9	Scaffold	na
GCF_001619605.1	Brevibacillus parabrevis	CN1	Contig	na
GCF_003710905.1	Brevibacillus parabrevis	NRRL NRS 605	Contig	na
GCF_006539065.1	Brevibacillus parabrevis	NBRC 12334	Contig	na
GCF_900169215.1	Brevibacterium antiquum	P10	Contig	na
GCF_900169145.1	Brevibacterium antiquum CNRZ 918	CNRZ 918	Contig	na
GCF_004102925.1	Brevundimonas diminuta	ATCC(B) 19146	Complete Genome	na
GCF_003815775.1	Chryseobacterium joostei	DSM 16927	Complete Genome	na
GCF_002943655.1	Chryseobacterium shigense	DSM 17126	Scaffold	na
GCF_900156575.1	Chryseobacterium shigense	DSM 17126	Contig	na
GCF_900446825.1	Chryseobacterium shigense	NCTC13533	Contig	na
GCF_001558935.2	Citrobacter amalonaticus	FDAARGOS_165	Complete Genome	na
GCF_001559075.2	Citrobacter amalonaticus	FDAARGOS_122	Complete Genome	na
GCF_006965505.1	Citrobacter amalonaticus	133355-SW-C4-Cam	Complete Genome	na
GCF_000981805.1	Citrobacter amalonaticus Y19	Y19	Complete Genome	na
GCF_002073755.2	Citrobacter braakii	FDAARGOS_253	Complete Genome	na
GCF_002208845.2	Citrobacter braakii	FDAARGOS_290	Complete Genome	na
GCF_009648935.1	Citrobacter braakii	MiY-A	Complete Genome	na
GCF_002249995.1	Citrobacter farmeri	AUSMDU00008141	Complete Genome	na
GCF_003665575.1	Citrobacter pasteurii	UMH17	Complete Genome	na
GCF_001281005.1	Citrobacter portucalensis	P10159	Complete Genome	na
GCF_004801555.1	Citrobacter portucalensis	Effluent_1	Complete Genome	na
GCF_008086465.1	Citrobacter portucalensis	WCHCP085039	Complete Genome	na
GCF_008693605.1	Citrobacter portucalensis	FDAARGOS_617	Complete Genome	na
GCF_009730355.1	Citrobacter portucalensis	FDAARGOS_738	Complete Genome	na
GCF_002025225.1	Citrobacter werkmanii	BF-6	Complete Genome	na
GCF_002386385.1	Citrobacter werkmanii	FDAARGOS_364	Complete Genome	na
GCF_003665555.1	Citrobacter werkmanii	UMH18	Complete Genome	na
GCF_008693645.1	Citrobacter werkmanii	FDAARGOS_616	Complete Genome	na
GCF_902388105.1	Citrobacter werkmanii		Complete Genome	na
GCF_003255895.1	Citrobacter youngae	L6	Complete Genome	na
GCF_900638065.1	Citrobacter youngae	NCTC13709	Complete Genome	na
GCF_001052555.1	Corynebacterium propinquum	1274_CJEI	Contig	na
GCF_001053555.1	Corynebacterium propinquum	143_CAUR	Contig	na
GCF_001054395.1	Corynebacterium propinquum	149_CJEI	Contig	na
GCF_003989165.1	Corynebacterium propinquum	HSID18036	Contig	na
GCF_003989215.1	Corynebacterium propinquum	HSID18034	Contig	na
GCF_003989475.1	Corynebacterium propinquum	HSID18035	Contig	na
GCF_007671985.1	Corynebacterium propinquum	DE0547	Scaffold	na
GCF_007672025.1	Corynebacterium propinquum	DE0530	Scaffold	na
GCF_902362995.1	Corynebacterium propinquum		Scaffold	na
GCF_000375525.1	Corynebacterium propinquum DSM 44285	DSM 44285	Contig	na
GCF_000175635.1	Corynebacterium tuberculostearicum SK141	SK141	Contig	na
GCF_001267395.1	Enterococcus durans	KLDS6.0933	Complete Genome	na
GCF_001558875.2	Enterococcus gallinarum	FDAARGOS_163	Complete Genome	na
GCF_009730155.1	Enterococcus gallinarum	FDAARGOS_728	Complete Genome	na
GCF_008274845.1	Exiguobacterium acetylicum	AMCC 101217	Complete Genome	na
GCF_005864045.1	Facklamia tabacinasalis	FAM 24227	Contig	na
GCF_003687415.1	Glutamicibacter nicotianae	OTC-16	Complete Genome	na
GCF_001636255.1	Hafnia alvei	HUMV-5920	Complete Genome	na
GCF_003253795.1	Hafnia alvei	CBA7135	Complete Genome	na
GCF_004328605.1	Hafnia alvei	PCM_1220	Complete Genome	na
GCF_902387815.1	Hafnia alvei		Complete Genome	na
GCF_000597785.2	Hafnia alvei FB1	FB1	Complete Genome	na
GCF_003950215.1	Halomonas venusta	MA-ZP17-13	Complete Genome	na
GCF_000632025.1	Janthinobacterium lividum	RIT308	Contig	na
GCF_000783415.1	Janthinobacterium lividum	MTR	Contig	na
GCF_001678745.1	Janthinobacterium lividum	ERGS5:01	Contig	na
GCF_001758635.1	Janthinobacterium lividum	H-24	Contig	na
GCF_001854915.1	Janthinobacterium lividum	MEG1	Scaffold	na
GCF_006152155.1	Janthinobacterium lividum	UCD_MED1	Contig	na
GCF_900119665.1	Janthinobacterium lividum	NFR18	Scaffold	na
GCF_900451145.1	Janthinobacterium lividum	NCTC9796	Contig	na
GCF_900451225.1	Janthinobacterium lividum	NCTC8661	Contig	na
GCF_000242815.1	Janthinobacterium lividum PAMC 25724	PAMC 25724	Contig	na
GCF_009649915.1	Kluyvera intermedia	N2-1	Complete Genome	na
GCF_009650415.1	Kluyvera intermedia	HR2	Complete Genome	na
GCF_900635475.1	Kluyvera intermedia	NCTC12125	Complete Genome	na
GCF_004136555.1	Kocuria carniphila	CCM 132	Contig	na
GCF_002250745.1	Kocuria varians	80	Contig	na
GCF_006539885.1	Kocuria varians	NBRC 15358	Contig	na
GCF_900014985.1	Kocuria varians	G6	Contig	na
GCF_003660425.1	Kurthia gibsonii	B83	Contig	na
GCF_006539985.1	Kurthia gibsonii	NBRC 15534	Contig	na
GCF_002192215.1	Lactobacillus casei	LC5	Complete Genome	na
GCF_900492555.1	Lactobacillus casei		Complete Genome	na
GCF_000309565.2	Lactobacillus casei 12A	12A	Complete Genome	na
GCF_000026485.1	Lactobacillus casei BL23	BL23	Complete Genome	na
GCF_000829055.1	Lactobacillus casei subsp. casei ATCC 393	ATCC 393	Complete Genome	na
GCF_000318035.1	Lactobacillus casei W56	W56	Complete Genome	na
GCF_001888945.1	Lactobacillus delbrueckii subsp. delbrueckii	KCTC 13731	Complete Genome	na
GCF_002142575.1	Lactobacillus delbrueckii subsp. delbrueckii	TUA4408L	Complete Genome	na
GCF_006740305.1	Lactobacillus delbrueckii subsp. delbrueckii	NBRC 3202	Complete Genome	na
GCF_001888905.1	Lactobacillus delbrueckii subsp. lactis	KCCM 34717	Complete Genome	na
GCF_001888985.1	Lactobacillus delbrueckii subsp. lactis	KCTC 3035	Complete Genome	na
GCF_002285775.1	Lactobacillus delbrueckii subsp. lactis	KCTC 3034	Complete Genome	na
GCF_900322585.1	Lactobacillus delbrueckii subsp. lactis		Complete Genome	na
GCF_002278095.1	Lactobacillus delbrueckii subsp. lactis DSM 20072	DSM 20072	Complete Genome	na
GCF_002276525.1	Lactobacillus kefiri	KR	Contig	na
GCF_002276775.1	Lactobacillus kefiri	Olga	Contig	na
GCF_002276955.1	Lactobacillus kefiri	OG2	Contig	na
GCF_003131085.1	Lactobacillus kefiri	SGL 13	Scaffold	na
GCF_007989105.1	Lactobacillus kefiri	NBRC 15888	Contig	na
GCF_902387495.1	Lactobacillus kefiri		Scaffold	na
GCF_001436175.1	Lactobacillus kefiri DSM 20587 = JCM 5818	DSM 20587	Scaffold	na
GCF_008632615.1	Lactobacillus nenjiangensis	SH-Y15	Complete Genome	na
GCF_002157585.1	Lactobacillus parakefiri	JCM 8573	Scaffold	na
GCF_002276645.1	Lactobacillus parakefiri	OG2	Contig	na
GCF_002276885.1	Lactobacillus parakefiri	KR	Contig	na
GCF_004354625.1	Lactobacillus parakefiri	DSM 10551	Scaffold	na
GCF_001443645.1	Lactobacillus paraplantarum	L-ZS9	Complete Genome	na
GCF_003641145.1	Lactobacillus paraplantarum	DSM 10667	Complete Genome	na
GCF_002211885.1	Lactobacillus pentosus	SLC13	Complete Genome	na
GCF_002850015.1	Lactobacillus pentosus	BGM48	Complete Genome	na
GCF_003627295.1	Lactobacillus pentosus	ZFM222	Complete Genome	na
GCF_003627375.1	Lactobacillus pentosus	ZFM94	Complete Genome	na
GCF_003641185.1	Lactobacillus pentosus	DSM 20314	Complete Genome	na
GCF_003641165.1	Lactobacillus plantarum subsp. argentoratensis	DSM 16365	Complete Genome	na
GCF_001272315.2	Lactobacillus plantarum subsp. plantarum	CGMCC 1.557	Complete Genome	na
GCF_001908455.1	Lactobacillus plantarum subsp. plantarum	TS12	Complete Genome	na
GCF_002174195.1	Lactobacillus plantarum subsp. plantarum		Complete Genome	na
GCF_002906875.1	Lactobacillus plantarum subsp. plantarum	LB1-2	Complete Genome	na
GCF_003952885.1	Lactobacillus plantarum subsp. plantarum	nF1-FD	Complete Genome	na
GCF_005576935.1	Lactobacillus plantarum subsp. plantarum	BNH17	Complete Genome	na
GCF_000392485.3	Lactobacillus plantarum subsp. plantarum P-8	plantarum	Complete Genome	na
GCF_000148815.2	Lactobacillus plantarum subsp. plantarum ST-III	ST-III	Complete Genome	na
GCF_002078375.2	Lactococcus lactis subsp. cremoris	158	Complete Genome	na
GCF_002078765.2	Lactococcus lactis subsp. cremoris	UC109	Complete Genome	na
GCF_002078895.1	Lactococcus lactis subsp. cremoris	JM1	Complete Genome	na
GCF_002078915.1	Lactococcus lactis subsp. cremoris	JM2	Complete Genome	na
GCF_002078935.1	Lactococcus lactis subsp. cremoris	JM3	Complete Genome	na
GCF_002078955.1	Lactococcus lactis subsp. cremoris	JM4	Complete Genome	na
GCF_003394085.1	Lactococcus lactis subsp. cremoris	3107	Complete Genome	na
GCF_003966935.1	Lactococcus lactis subsp. cremoris	C4	Complete Genome	na
GCF_000236475.1	Lactococcus lactis subsp. cremoris A76	A76	Complete Genome	na
GCF_000468955.1	Lactococcus lactis subsp. cremoris KW2	KW2	Complete Genome	na
GCF_000009425.1	Lactococcus lactis subsp. cremoris MG1363	MG1363	Complete Genome	na
GCF_000143205.1	Lactococcus lactis subsp. cremoris NZ9000	NZ9000	Complete Genome	na
GCF_000014545.1	Lactococcus lactis subsp. cremoris SK11	SK11	Complete Genome	na
GCF_000312685.1	Lactococcus lactis subsp. cremoris UC509.9	UC509.9	Complete Genome	na
GCF_002310475.1	Lactococcus raffinolactis	WiKim0068	Complete Genome	na
GCF_001652505.2	Lelliottia amnigena	ZB04	Complete Genome	na
GCF_002393405.1	Lelliottia amnigena	FDAARGOS_395	Complete Genome	na
GCF_900635465.1	Lelliottia amnigena	NCTC12124	Complete Genome	na
GCF_001184265.1	Leuconostoc mesenteroides subsp. cremoris	LbT16	Contig	na
GCF_002092045.1	Leuconostoc mesenteroides subsp. cremoris	LMGCF01	Contig	na
GCF_002092085.1	Leuconostoc mesenteroides subsp. cremoris	LMGCF05	Contig	na
GCF_002092105.1	Leuconostoc mesenteroides subsp. cremoris	LMGCF09	Contig	na
GCF_002092135.1	Leuconostoc mesenteroides subsp. cremoris	LMGCF02	Contig	na
GCF_002092145.1	Leuconostoc mesenteroides subsp. cremoris	LMGCF03	Contig	na
GCF_002092155.1	Leuconostoc mesenteroides subsp. cremoris	LMGCF04	Contig	na
GCF_002092215.1	Leuconostoc mesenteroides subsp. cremoris	LMGCF07	Scaffold	na
GCF_002092245.1	Leuconostoc mesenteroides subsp. cremoris	LMGCF10	Contig	na
GCF_002092315.1	Leuconostoc mesenteroides subsp. cremoris	LMGCF11	Contig	na
GCF_002092335.1	Leuconostoc mesenteroides subsp. cremoris	LMGCF14	Contig	na
GCF_002092385.1	Leuconostoc mesenteroides subsp. cremoris	LMGCF12	Contig	na
GCF_002092415.1	Leuconostoc mesenteroides subsp. cremoris	LMGCF19	Contig	na
GCF_002092425.1	Leuconostoc mesenteroides subsp. cremoris	LMGCF17	Contig	na
GCF_002092455.1	Leuconostoc mesenteroides subsp. cremoris	LMGCF20	Contig	na
GCF_002092465.1	Leuconostoc mesenteroides subsp. cremoris	LMGCF13	Contig	na
GCF_002092495.1	Leuconostoc mesenteroides subsp. cremoris	LMGCF18	Contig	na
GCF_002092515.1	Leuconostoc mesenteroides subsp. cremoris	LMGCF16	Contig	na
GCF_002092615.1	Leuconostoc mesenteroides subsp. cremoris	LN07	Contig	na
GCF_007992255.1	Leuconostoc mesenteroides subsp. cremoris	NBRC 107766	Contig	na
GCF_000160595.1	Leuconostoc mesenteroides subsp. cremoris ATCC 19254	ATCC 19254	Scaffold	na
GCF_000686485.1	Leuconostoc mesenteroides subsp. cremoris T26	T26	Scaffold	na
GCF_000447945.1	Leuconostoc mesenteroides subsp. cremoris TIFN8	TIFN8	Contig	na
GCF_001047695.1	Leuconostoc mesenteroides subsp. dextranicum	DSM 20484	Complete Genome	na
GCF_009648575.1	Listeria innocua	CFSAN044836	Complete Genome	na
GCF_000195795.1	Listeria innocua Clip11262	Clip11262	Complete Genome	na
GCF_003752415.1	Luteococcus japonicus	DSM 10546	Contig	na
GCF_900163845.1	Luteococcus japonicus LSP_Lj1	LSP_Lj1	Contig	na
GCF_002119825.1	Macrococcus caseolyticus	IMD0819	Complete Genome	na
GCF_000010585.1	Macrococcus caseolyticus JCSC5402	JCSC5402	Complete Genome	na
GCF_006539445.1	Microbacterium lacticum	NBRC 14135	Contig	na
GCF_006716815.1	Microbacterium lacticum	DSM 20427	Contig	na
GCF_000230915.1	Paenibacillus lactis 154	154	Contig	na
GCF_900016155.1	Propionibacterium freudenreichii subsp. shermanii		Complete Genome	na
GCF_000091725.1	Propionibacterium freudenreichii subsp. shermanii CIRM-BIA1	CIRM-B1AI	Complete Genome	na
GCF_004116975.1	Proteus hauseri	15H5D-4a	Complete Genome	na
GCF_002591155.1	Proteus vulgaris	FDAARGOS_366	Complete Genome	na
GCF_003812525.1	Proteus vulgaris	FDAARGOS_556	Complete Genome	na
GCF_901472505.1	Proteus vulgaris	NCTC13145	Complete Genome	na
GCF_001874625.1	Providencia rettgeri	RB151	Complete Genome	na
GCF_002984195.1	Providencia rettgeri	FDAARGOS_330	Complete Genome	na
GCF_003204135.1	Providencia rettgeri	AR_0082	Complete Genome	na
GCF_005155965.1	Providencia rettgeri	Pr-15-2-50	Complete Genome	na
GCF_900105475.1	Pseudomonas asplenii	ATCC 23835	Chromosome	na
GCF_001543265.1	Pseudomonas fragi	P121	Complete Genome	na
GCF_002128325.1	Pseudomonas fragi	NMC25	Complete Genome	na
GCF_001020725.2	Pseudomonas lundensis	AU1044	Complete Genome	na
GCF_001645105.1	Pseudomonas marginalis	ICMP 3553	Scaffold	na
GCF_007858155.1	Pseudomonas marginalis	DSM 13124	Contig	na
GCF_900105325.1	Pseudomonas marginalis	BS2952	Contig	na
GCF_001467265.1	Pseudomonas marginalis ICMP 9505	ICMP 9505	Scaffold	na
GCF_003700725.1	Pseudomonas marginalis pv. marginalis	ICMP 3553	Scaffold	na
GCF_003700875.1	Pseudomonas marginalis pv. marginalis	ICMP 3555	Scaffold	na
GCF_003700955.1	Pseudomonas marginalis pv. marginalis	ICMP 9503	Scaffold	na
GCF_003702065.1	Pseudomonas marginalis pv. marginalis	ICMP 14937	Scaffold	na
GCF_003148585.1	Psychrobacter immobilis	DSM 7229	Scaffold	na
GCF_900203135.1	Psychrobacter immobilis	Neisseria meningitidis	Contig	na
GCF_000829965.1	Raoultella ornithinolytica	S12	Complete Genome	na
GCF_001455225.1	Raoultella ornithinolytica	Yangling I2	Complete Genome	na
GCF_001700855.1	Raoultella ornithinolytica	A14	Complete Genome	na
GCF_001866535.2	Raoultella ornithinolytica	MG	Complete Genome	na
GCF_002214825.1	Raoultella ornithinolytica	Ro24724	Complete Genome	na
GCF_003798165.1	Raoultella ornithinolytica	YDC775_2	Complete Genome	na
GCF_005165545.1	Raoultella ornithinolytica	WLK218	Complete Genome	na
GCF_000367425.1	Raoultella ornithinolytica B6	B6	Complete Genome	na
GCF_000783935.2	Raoultella planticola	FDAARGOS_64	Complete Genome	na
GCF_002906195.1	Raoultella planticola	GODA	Complete Genome	na
GCF_008694045.1	Raoultella planticola	S25	Complete Genome	na
GCF_009660185.1	Serratia proteamaculans	336X	Complete Genome	na
GCF_000018085.1	Serratia proteamaculans 568	568	Complete Genome	na
GCF_003054045.1	Sphingobacterium faecium	DSM 11690	Scaffold	na
GCF_009496545.1	Sphingobacterium faecium	MYb181	Contig	na
GCF_007990875.1	Sphingobacterium faecium NBRC 15299	NBRC 15299	Contig	na
GCF_003966585.1	Staphylococcus caprae	JMUB145	Complete Genome	na
GCF_003966605.1	Staphylococcus caprae	JMUB590	Complete Genome	na
GCF_003966625.1	Staphylococcus caprae	JMUB898	Complete Genome	na
GCF_007814385.1	Staphylococcus caprae	26D	Complete Genome	na
GCF_007813835.1	Staphylococcus chromogenes	20B	Complete Genome	na
GCF_007814525.1	Staphylococcus chromogenes	17A	Complete Genome	na
GCF_007814955.1	Staphylococcus chromogenes	34B	Complete Genome	na
GCF_000981135.1	Staphylococcus equorum subsp. equorum	G8HB1	Contig	na
GCF_003968885.1	Staphylococcus equorum subsp. equorum	NCTC 12414	Scaffold	na
GCF_000297455.1	Staphylococcus equorum subsp. equorum Mu2	Mu2	Contig	na
GCF_002901955.1	Staphylococcus equorum subsp. linens	DSM 15097	Scaffold	na
GCF_009730555.1	Staphylococcus fleurettii	FDAARGOS_682	Complete Genome	na
GCF_900474615.1	Staphylococcus sciuri subsp. sciuri	NCTC12103	Complete Genome	na
GCF_003571725.1	Staphylococcus warneri	22.1	Complete Genome	na
GCF_003691405.1	Staphylococcus warneri	SWO	Complete Genome	na
GCF_007814275.1	Staphylococcus warneri	16A	Complete Genome	na
GCF_900636265.1	Staphylococcus warneri	NCTC7291	Complete Genome	na
GCF_900636385.1	Staphylococcus warneri	NCTC11044	Complete Genome	na
GCF_000246835.1	Streptococcus infantarius subsp. infantarius CJ18	CJ18	Complete Genome	na
GCF_900475065.1	Streptococcus lutetiensis	NCTC8738	Complete Genome	na
GCF_900475675.1	Streptococcus lutetiensis	NCTC13774	Complete Genome	na
GCF_901543605.1	Streptococcus lutetiensis	NCTC8796	Complete Genome	na
GCF_000441535.1	Streptococcus lutetiensis 033	33	Complete Genome	na
GCF_000283635.1	Streptococcus macedonicus ACA-DC 198	ACA-DC 198	Complete Genome	na
GCF_900636445.1	Streptococcus vestibularis	NCTC12167	Complete Genome	na
GCF_002218025.2	Vibrio casei	DSM 22364	Complete Genome	na
GCF_006777025.1	Weissella hellenica	0916-4-2	Complete Genome	na
GCF_007954725.1	Weissella hellenica	CBA3632	Complete Genome	na

## Sheet: Software dependencies
RUCS	Version	find_differential_primers	Version
python3	3.5	python3	3.5
bwa	0.7.12	primer3	1.1.4
blast	2.9.0+	emboss	6.6.0.0
samtools	1.9	blast	2.9.0+
python modules		prodigal	2.6.3
- tabulate		mafft	7.407
- primer3-py		python modules
- numpy		- biopython

## Sheet: Command line
Preparation (Ubuntu 16.04)
Installed all dependencies, downloaded and installed software as described on GitHub / Bitbucket (Master Branch)
Added primer_core_tools.py (RUCS) script to PATH
RUCS
# prepared a directory for the target fasta files (e.g. target_fna or positives) and copied the positive set genome assemblies in the directory
# prepared a directory for the non-target fasta files (e.g. nontarget_fna or negatives) and copied the negative set genome assemblies in the directory (excluding the assembly for the target species)
$ primer_core_tools.py full --positives target_fna/* --negatives nontarget_fna/* --product_size_min 70 --product_size_max 200
Results file: results_best.tsv
find_differential_primers.py
# prepared a directory for the target fasta files (e.g. target_fna or positives) and copied the positive set genome assemblies in the directory
# prepared a directory for the non-target fasta files (e.g. nontarget_fna or negatives) and copied the negative set genome assemblies in the directory (excluding the assembly for the target species)
$ cat nontarget_fna/* > nontargetseqs.fas # 449 assembllies excluding the target species assembly from the negative set
$ makeblastdb -in nontargetseqs.fas -parse_seqids -title nontargetDB -dbtype nucl
# prepared a config.tab file adding information for every target sequence (see example lines below)
find_differential_primers.py -i config.tab --psizemin=70 --psizemax=200 --blastdb=nontargetseqs.fas
Results file: differential_primer_results/universal_primers.eprimer3
Example lines for config file (columns tab separated)
GCF_001767275.1	Pediococcus_acidilactici	/home/username/fdp_run/Pediococcus_acidilactici/target_fna/GCF_001767275v1.fna	-	-	-
GCF_000380265.1	Pediococcus_acidilactici	/home/username/fdp_run/Pediococcus_acidilactici/target_fna/GCF_000380265v1.fna	-	-	-
SpeciesPrimer v2.1
# Installation
sudo docker pull biologger/speciesprimer
sudo docker run -v $HOME/blastdb:/blastdb -v $HOME/primerdesign:/primerdesign --name speciesprimer biologger/speciesprimer
# prepared a blastdb directory
$ cat negativset_fna/* > customdb.fas # 450 assembllies (see Negative set genome assemblies)
$ makeblastdb -in customdb.fas -parse_seqids -title nontargetDB -dbtype nucl
# prepared a primerdesign directory and copied the target fna, gff and ffn files into a target subdirectory
# example directory structure: $HOME/primerdesign/Enterococcus_faecalis --> fna_files, gff_files, ffn_files
sudo docker exec -it speciesprimer bash
speciesprimer.py -t Enterococcus faecalis Enterococcus faecium Pediococcus_acidilactici Pediococcus pentosaceus --qc_gene tuf recA dnaK --nolist --skip_download --customdb /blastdb/customdb.fas # email address was provided after prompt

## Sheet: Best primers sequences
Primer name	Forward sequence	Reverse sequence	Amplicon size [bp]	Target species	Tool
Ec_faeca_pgpH_5_P0	ACACGGGTGCTATGCTAATCA	ACATCAACTGCTCTGTTTGGA	72	Enterococcus faecalis	SpeciesPrimer
Ec_faeca_acuI_1_P0	TCATTTCAAGCATTTACGTTAAGAGA	CGTCTAAAGTAATGGTTTCTAGTTGA	73	Enterococcus faecalis	SpeciesPrimer
RUCS_Ec_faeca_1	CGACGGATTAACCCCATGACT	GCGAAGAACAGTAGGAGGACT	116	Enterococcus faecalis	RUCS
RUCS_Ec_faeca_2	GCGGGACTAATTGAACAAGAGC	ACGAAGAAACCTTCTAGCTCGA	172	Enterococcus faecalis	RUCS
fdp_Ec_faeca_1	GCCCATTGTTTCACTTGATG	ATGGCGAATCTGTACAACCA	100	Enterococcus faecalis	find_differential_primers
fdp_Ec_faeca_16	GCTAGCCGTTGAGACAATGA	GTTTCGTTGAATCTCGCTGA	101	Enterococcus faecalis	find_differential_primers
Ec_faeci_cysS_3_P1	GCAGCCACCAATTTACAACGA	TCATCTGCCAAATTCTCTGAGG	86	Enterococcus faecium	SpeciesPrimer
Ec_faeci_purK_1_P0	GGCGGTCAATTAGGTCGTATG	CAGGATCCAGCACACCTACT	73	Enterococcus faecium	SpeciesPrimer
RUCS_Ec_faeci_1	GCTGGAGACTTGATTGCTGTC	TCAATGTGAAGGATAGGTAACGCA	101	Enterococcus faecium	RUCS
RUCS_Ec_faeci_2	GAGGAATGTGTGACAAATGGCA	GCATTGACTTCATCTAGCAGTGC	72	Enterococcus faecium	RUCS
fdp_Ec_faeci_4	GGATATTCATCGCGTTTCCT	GAATGCCTCAGTTGCTTTGA	101	Enterococcus faecium	find_differential_primers
fdp_Ec_faeci_13	GCAGACAGATTGCCGTCTAA	TGACCTTTCACAGGCAGAAG	99	Enterococcus faecium	find_differential_primers
Pd_acidi_relA_1_P1	AATGTCCAAAGAACCAGTATTATCGG	CTCTTCATTCATATATTCTCGGCACA	70	Pediococcus acidilactici	SpeciesPrimer
Pd_acidi_relA_1_P2	ATGTTAATGTCCAAAGAACCAGTATT	TCATTCATATATTCTCGGCACATGT	71	Pediococcus acidilactici	SpeciesPrimer
RUCS_Pd_acidi_1	ACGGTTGCTAAGTTATACGACCA	GCAGGCTTAACACTACCACCA	74	Pediococcus acidilactici	RUCS
RUCS_Pd_acidi_2	CGGCCCATTAAAAGCGATCG	GCCATTCCTAATCCGTCCCAA	84	Pediococcus acidilactici	RUCS
fdp_Pd_acidi_7	TGGGCACAAACCTTGATTTA	AAAGCCCATTGGATAAGTGC	100	Pediococcus acidilactici	find_differential_primers
fdp_Pd_acidi_19	AACTGGGTCGAAGTGGAATC	AGCGCTCCAGAGTGGTTATT	99	Pediococcus acidilactici	find_differential_primers
Pd_pento_nadK_2_P0	TGGAGGAGCTGAAGTTTCGT	TGTGGACTCGTTAACTGCCT	94	Pediococcus pentosaceus	SpeciesPrimer
Pd_pento_tagE_1_P1	TCGCTTATGGGTTAGGGATGC	TCTACCGCACTAGTTCCCTGA	93	Pediococcus pentosaceus	SpeciesPrimer
RUCS_Pd_pento_1	GCGGGATATAGCACTCCAACT	CGGGGCCTATTAGTAACGCAA	88	Pediococcus pentosaceus	RUCS
RUCS_Pd_pento_2	CCGGCTCTTGAATTTGACGAA	TGCCACTCTTTGTACAACCCA	129	Pediococcus pentosaceus	RUCS
fdp_Pd_pento_6	GCTCCTGAAGGCGTAGAATC	TTCAGGGTCTTGAAGTGCAG	99	Pediococcus pentosaceus	find_differential_primers
fdp_Pd_pento_15	TTCCGGTATCAAATCGTTCA	ATCCTTGGTAGGCACCAAAC	100	Pediococcus pentosaceus	find_differential_primers

## Sheet: Primer-BLAST summary
SpeciesPrimer
Target species:	Enterococcus faecalis		Enterococcus faecium		Pediococcus acidilactici		Pediococcus pentosaceus
Primer:	*Ec_faeca_acuI_1_P0	Ec_faeca_pgpH_5_P0	*Ec_faeci_cysS_3_P1	Ec_faeci_purK_1_P0	*Pd_acidi_relA_1_P1	Pd_acidi_relA_1_P2	Pd_pento_nadK_2_P0	*Pd_pento_tagE_1_P1
Amplicon size [bp]:	73	72	86	73	70	71	94	93
Target sequences with perfect primer match:	59	59	153	153	11	11	8	9
Total target sequences with primer match:	59	59	153	153	11	11	9	9
Primer (forward) mismatches	0	0	0	0	0	0	0	0
Primer (reverse) mismatches	0	0	0	0	0	0	1	0
Predicted PCR products for non-target species:	1	1	1	1	0	0	0	0
Non-target sequence	FP929058.1 Enterococcus sp. 7L76 draft genome		CP042839.1 Enterococcus sp. DA9 chromosome, complete genome
Amplicon size [bp]	73	72	86	73
Primer (forward) mismatches	0	0	0	0
Primer (reverse) mismatches	0	0	0	0
RUCS
Target species:	Enterococcus faecalis		Enterococcus faecium		Pediococcus acidilactici		Pediococcus pentosaceus
Primer:	*RUCS_Ec_faeca_1	RUCS_Ec_faeca_2	RUCS_Ec_faeci_1	*RUCS_Ec_faeci_2	RUCS_Pd_acidi_1	*RUCS_Pd_acidi_2	*RUCS_Pd_pento_1	RUCS_Pd_pento_2
Amplicon size [bp]:	116	172	101	72	74	84	88	129
Target sequences with perfect primer match:	59	59	153	153	11	11	9	9
Total target sequences with primer match:	59	59	153	153	11	11	9	9
Predicted PCR products for non-target species:	1	1	2	1	6	1	0	0
Non-target sequence	FP929058.1 Enterococcus sp. 7L76 draft genome		CP042839.1 Enterococcus sp. DA9 chromosome, complete genome		CP019981.1 Pediococcus inopinatus strain DSM 20285 chromosome	CP028726.1 Enterococcus faecalis strain CVM N60443F plasmid pN60443F-1
Amplicon size [bp]	116	172	101	72	74	2346
Primer (forward) mismatches	0	0	0	0	1	3
Primer (reverse) mismatches	0	0	0	0	2	3 (forward)
Non-target sequence			CP023074.1 Enterococcus thailandicus strain a523 chromosome		CP012288.1 Pediococcus damnosus strains (TMW 2.1535, 2.1536, 2.1534, 2.1533)
Amplicon size [bp]			101		74
Primer (forward) mismatches			2		2
Primer (reverse) mismatches			3		3
find_differential_primers
Target species:	Enterococcus faecalis		Enterococcus faecium		Pediococcus acidilactici		Pediococcus pentosaceus
Primer:	fdp_Ec_faeca_1	*fdp_Ec_faeca_16	fdp_Ec_faeci_4	*fdp_Ec_faeci_13	*fdp_Pd_acidi_7	fdp_Pd_acidi_19	*fdp_Pd_pento_6	fdp_Pd_pento_15
Amplicon size [bp]:	100	101	101	99	100	99	99	100
Target sequences with perfect primer match:	58	58	136	153	10	5	9	9
Total target sequences with primer match:	59	59	153	153	11	11	9	9
Primer (forward) mismatches	1 (3'-end)	1	1	0	0	1	0	0
Primer (reverse) mismatches	0	0	0	0	2	0	0	0
Predicted PCR products for non-target species:	1	1	2	1	1	0	0	0
Non-target sequence	FP929058.1 Enterococcus sp. 7L76 draft genome		CP042839.1 Enterococcus sp. DA9 chromosome, complete genome		CP019438.1 Thioclava nitratireducens strain 25B10_4 plasmid unnamed1
Amplicon size [bp]	100	101	101	99	1574
Primer (forward) mismatches	0	0	0	0	3
Primer (reverse) mismatches	0	0	0	0	3 (forward)
Non-target sequence			CP019437.1 Thioclava nitratireducens strain 25B10_4 chromosome
Amplicon size [bp]			2600
Primer (forward) mismatches			3
Primer (reverse) mismatches			3
* Best primer pair (Table 6)
