# Supplementary material for: SpeciesPrimer: a bioinformatics pipeline dedicated to the design of qPCR primers for the quantification of bacterial species
Source: PeerJ. 2020 Feb 18;8:e8544. doi: 10.7717/peerj.8544 (PMC7034379; doi:10.7717/peerj.8544)
Supplement: Dataset S6 — Raw qPCR data for the in vitro validation of the primer pairs Ec_faeca_acuI, Ec_faeca_g3060, Ec_faeci_cysS, Ec_faeci_purD, Pd_acidi_asnS, Pd_acidi_g1164, Pd_pento_nagK and Pd_pento_g4364. [file peerj-08-8544-s006.xlsx]

## Sheet: Ecfaeca_acuI_assay
Excel Analysed Data Export
(C)Copyright 2003 Corbett Research, Pty Ltd. (R) All Rights Reserved.
File	Ecfaeca_acuI_assay.rex
Date	09.01.2019
Time	10:38:18
Quantitative analysis of Cycling A.Green (Ecfaeca_acuI)
No.	Name	Ct	Given Conc (copies/reaction)	Calc Conc (copies/reaction)	% Var	Rep. Ct	Rep. Ct Std. Dev.	Rep. Ct (95% CI)	Rep. Calc. Conc.	Rep. Calc. Conc. (95% CI)
1	ATCC 19433	12.60				12.49	0.16
2	ATCC 19433	12.37
3	DSM 20380	14.58				14.60	0.04
4	DSM 20380	14.63
5	FAM 2922	14.28				14.30	0.03
6	FAM 2922	14.32
7	FAM 8254	14.08				14.10	0.03
8	FAM 8254	14.12
9	FAM 8493	14.42				14.41	0.02
10	FAM 8493	14.40
11	FAM 8494	14.37				14.38	0.01
12	FAM 8494	14.38
13	FAM 8495	14.54				14.55	0.01
14	FAM 8495	14.56
15	FAM 10310	15.41				15.45	0.06
16	FAM 10310	15.50
17	FAM 20649	14.79				14.74	0.07
18	FAM 20649	14.69
19	FAM 20853	15.44				15.45	0.01
20	FAM 20853	15.46
21	FAM 22123	14.84				14.86	0.03
22	FAM 22123	14.88
23	FAM 22196	14.89				14.88	0.02
24	FAM 22196	14.86
25	FAM 22219	15.43				15.37	0.09
26	FAM 22219	15.31
27	FAM 22220	15.50				15.52	0.03
28	FAM 22220	15.54
29	FAM 22237	14.53				14.47	0.08
30	FAM 22237	14.42
31	FAM 22739	15.52				15.34	0.25
32	FAM 22739	15.16
33	FAM 22965	14.32				14.35	0.04
34	FAM 22965	14.38
35	FAM 23457	14.09				14.17	0.11
36	FAM 23457	14.26
37	DSM 20060	14.52				14.55	0.05
38	DSM 20060	14.59
39	DSM 20376	13.06				13.16	0.14
40	DSM 20376	13.26
41	DSM 29488	14.44				14.36	0.10
42	DSM 29488	14.29
43	DSM 20371	14.59				14.62	0.04
44	DSM 20371	14.65
63	NTC
64	NTC
65	NTC
Melt analysis of Melt A.Green (Ecfaeca_acuI)
No.	Name	Genotype	Peak 1
1	ATCC 19433		75.5
2	ATCC 19433		75.5
3	DSM 20380		75.5
4	DSM 20380		75.5
5	FAM 2922		75.5
6	FAM 2922		75.5
7	FAM 8254		75.5
8	FAM 8254		75.5
9	FAM 8493		75.5
10	FAM 8493		75.5
11	FAM 8494		75.5
12	FAM 8494		75.5
13	FAM 8495		75.5
14	FAM 8495		75.5
15	FAM 10310		75.5
16	FAM 10310		75.5
17	FAM 20649		75.5
18	FAM 20649		75.5
19	FAM 20853		75.5
20	FAM 20853		75.5
21	FAM 22123		75.5
22	FAM 22123		75.5
23	FAM 22196		75.5
24	FAM 22196		75.5
25	FAM 22219		75.5
26	FAM 22219		75.5
27	FAM 22220		75.5
28	FAM 22220		75.5
29	FAM 22237		75.5
30	FAM 22237		75.5
31	FAM 22739		75.5
32	FAM 22739		75.5
33	FAM 22965		75.5
34	FAM 22965		75.5
35	FAM 23457		75.5
36	FAM 23457		75.5
37	DSM 20060		75.5
38	DSM 20060		75.5
39	DSM 20376		75.5
40	DSM 20376		75.5
41	DSM 29488		75.5
42	DSM 29488		75.5
43	DSM 20371		75.5
44	DSM 20371		75.5
63	NTC
64	NTC
65	NTC

## Sheet: Ecfaeca_acuI_typestrain_dilutio
Excel Analysed Data Export
(C)Copyright 2003 Corbett Research, Pty Ltd. (R) All Rights Reserved.
File	Ecfaeca_acuI_dilutions.rex
Date	10.01.2019
Time	14:08:24
Quantitative analysis of Cycling A.Green (Ecfaeca_acuI)
No.	Name	Ct	Given Conc (copies/reaction)	Calc Conc (copies/reaction)	% Var	Rep. Ct	Rep. Ct Std. Dev.	Rep. Ct (95% CI)	Rep. Calc. Conc.	Rep. Calc. Conc. (95% CI)
1	ATCC 19433 10^6	11.97	1.00E+06	9.03E+05	9.7%	11.78	0.17	[11.36 , 12.21]	1.02E+06	[5.43E+05 , 1.93E+06]
2	ATCC 19433 10^6	11.75	1.00E+06	1.05E+06	4.5%
3	ATCC 19433 10^6	11.63	1.00E+06	1.13E+06	13.5%
4	ATCC 19433 10^5	14.91	1.00E+05	1.22E+05	21.7%	15.05	0.13	[14.74 , 15.36]	1.11E+05	[6.84E+04 , 1.79E+05]
5	ATCC 19433 10^5	15.15	1.00E+05	1.03E+05	3.3%
6	ATCC 19433 10^5	15.09	1.00E+05	1.07E+05	7.5%
7	ATCC 19433 10^4	18.64	1.00E+04	9.60E+03	4.0%	18.68	0.07	[18.50 , 18.85]	9.36E+03	[6.47E+03 , 1.36E+04]
8	ATCC 19433 10^4	18.63	1.00E+04	9.66E+03	3.4%
9	ATCC 19433 10^4	18.76	1.00E+04	8.85E+03	11.5%
10	ATCC 19433 10^3	22.01	1.00E+03	9.67E+02	3.3%	22.06	0.05	[21.94 , 22.19]	9.33E+02	[6.42E+02 , 1.35E+03]
11	ATCC 19433 10^3	22.07	1.00E+03	9.27E+02	7.3%
12	ATCC 19433 10^3	22.11	1.00E+03	9.04E+02	9.6%
13	ATCC 19433 10^2	26.08	1.00E+02	6.05E+01	39.5%	25.61	0.42	[24.56 , 26.65]	8.36E+01	[5.15E+01 , 1.36E+02]
14	ATCC 19433 10^2	25.28	1.00E+02	1.05E+02	4.7%
15	ATCC 19433 10^2	25.46	1.00E+02	9.24E+01	7.6%
16	ATCC 19433 10^1	28.56	1.00E+01	1.12E+01	11.7%	28.45	0.18	[27.99 , 28.90]	1.21E+01	[6.53E+00 , 2.24E+01]
17	ATCC 19433 10^1	28.54	1.00E+01	1.14E+01	13.7%
18	ATCC 19433 10^1	28.23	1.00E+01	1.40E+01	39.7%
19	NTC
20	NTC
21	NTC
Melt analysis of Melt A.Green (Ecfaeca_acuI)
No.	Name	Genotype	Peak 1
1	ATCC 19433 10^6		75.5
2	ATCC 19433 10^6		75.5
3	ATCC 19433 10^6		75.5
4	ATCC 19433 10^5		75.5
5	ATCC 19433 10^5		75.5
6	ATCC 19433 10^5		75.5
7	ATCC 19433 10^4		75.5
8	ATCC 19433 10^4		75.5
9	ATCC 19433 10^4		75.5
10	ATCC 19433 10^3		75.5
11	ATCC 19433 10^3		75.5
12	ATCC 19433 10^3		75.3
13	ATCC 19433 10^2		74.7
14	ATCC 19433 10^2		74.8
15	ATCC 19433 10^2		74.7
16	ATCC 19433 10^1		74.8
17	ATCC 19433 10^1		74.8
18	ATCC 19433 10^1		74.8
19	NTC
20	NTC
21	NTC

## Sheet: Ecfaeca_acuI_nontarget1
Excel Analysed Data Export
(C)Copyright 2003 Corbett Research, Pty Ltd. (R) All Rights Reserved.
File	Ecfaeca_acuI_nontarget1.rex
Date	08.01.2019
Time	15:40:56
Quantitative analysis of Cycling A.Green (Ecfaeca_acuI)
No.	Name	Ct	Given Conc (copies/reaction)	Calc Conc (copies/reaction)	% Var	Rep. Ct	Rep. Ct Std. Dev.	Rep. Ct (95% CI)	Rep. Calc. Conc.	Rep. Calc. Conc. (95% CI)
1	ATCC 19433	12.58				12.53	0.07
2	ATCC 19433	12.48
3	FAM 22123	14.60				14.75	0.21
4	FAM 22123	14.90
5	DSM 20376	13.13				12.84	0.41
6	DSM 20376	12.55
7	ATCC 19435
8	ATCC 19435
9	FAM 17950
10	FAM 17950
11	FAM 23201
12	FAM 23201
13	DSM 20069
14	DSM 20069
15	FAM 17873
16	FAM 17873
17	FAM 23216
18	FAM 23216
19	DSM 5707
20	DSM 5707
21	FAM 21731
22	FAM 21731
23	FAM 21823
24	FAM 21823
25	DSM 20617
26	DSM 20617
27	FAM 10792
28	FAM 10792
29	FAM 21476
30	FAM 21476
31	DSM 5622
32	DSM 5622
33	FAM 18133.2
34	FAM 18133.2
35	FAM 19331
36	FAM 19331
37	DSM 20021
38	DSM 20021
39	FAM 19984
40	FAM 19984
41	FAM 22674
42	FAM 22674
43	DSM 20075
44	DSM 20075
45	FAM 13019
46	FAM 13019
47	FAM 19190
48	FAM 19190
49	DSM 20052
50	DSM 20052
51	FAM 11660
52	FAM 11660
53
54
55	DSM 20174
56	DSM 20174
57	ATCC 8014
58	ATCC 8014
59	FAM 18858
60	FAM 18858
61	DSM 10667
62	DSM 10667
63	DSM 10641
64	DSM 10641
65	FAM 18197
66	FAM 18197
67	DSM 20019
68	DSM 20019
69	FAM 18731
70	FAM 18731
71	NTC
72	NTC
Melt analysis of Melt A.Green (Ecfaeca_acuI)
No.	Name	Genotype	Peak 1
1	ATCC 19433		75.5
2	ATCC 19433		75.5
3	FAM 22123		75.5
4	FAM 22123		75.5
5	DSM 20376		75.5
6	DSM 20376		75.5
7	ATCC 19435
8	ATCC 19435
9	FAM 17950
10	FAM 17950
11	FAM 23201
12	FAM 23201
13	DSM 20069
14	DSM 20069
15	FAM 17873
16	FAM 17873
17	FAM 23216
18	FAM 23216
19	DSM 5707
20	DSM 5707
21	FAM 21731
22	FAM 21731
23	FAM 21823
24	FAM 21823
25	DSM 20617
26	DSM 20617
27	FAM 10792
28	FAM 10792
29	FAM 21476
30	FAM 21476
31	DSM 5622
32	DSM 5622
33	FAM 18133.2
34	FAM 18133.2
35	FAM 19331
36	FAM 19331
37	DSM 20021
38	DSM 20021
39	FAM 19984
40	FAM 19984
41	FAM 22674
42	FAM 22674
43	DSM 20075
44	DSM 20075
45	FAM 13019
46	FAM 13019
47	FAM 19190
48	FAM 19190
49	DSM 20052
50	DSM 20052
51	FAM 11660
52	FAM 11660
53
54
55	DSM 20174
56	DSM 20174
57	ATCC 8014
58	ATCC 8014
59	FAM 18858
60	FAM 18858
61	DSM 10667
62	DSM 10667
63	DSM 10641
64	DSM 10641
65	FAM 18197
66	FAM 18197
67	DSM 20019
68	DSM 20019
69	FAM 18731
70	FAM 18731
71	NTC
72	NTC

## Sheet: Ecfaeca_acuI_nontarget2
Excel Analysed Data Export
(C)Copyright 2003 Corbett Research, Pty Ltd. (R) All Rights Reserved.
File	Ecfaeca_acuI_nontarget2.rex
Date	08.01.2019
Time	15:17:17
Quantitative analysis of Cycling A.Green (Ecfaeca_acuI)
No.	Name	Ct	Given Conc (copies/reaction)	Calc Conc (copies/reaction)	% Var	Rep. Ct	Rep. Ct Std. Dev.	Rep. Ct (95% CI)	Rep. Calc. Conc.	Rep. Calc. Conc. (95% CI)
1	ATCC 19433	12.60				12.48	0.17
2	ATCC 19433	12.36
3	FAM 22123	14.64				14.69	0.06
4	FAM 22123	14.73
5	DSM 20376	13.07				13.03	0.06
6	DSM 20376	12.99
7	FAM 18867
8	FAM 18867
9	DSM 20054
10	DSM 20054
11	CCUG 33268
12	CCUG 33268
13	CCUG 48612
14	CCUG 48612
15	DSM 20072
16	DSM 20072
17	DSM 20074
18	DSM 20074
19	DSM 20081
20	DSM 20081
21	DSM 20346
22	DSM 20346
23	DSM 20484
24	DSM 20484
25	DSM 20343
26	DSM 20343
27	DSM 20241
28	DSM 20241
29	DSM 20336
30	DSM 20336
31	FAM 1903
32	FAM 1903
33	DSM 20280
34	DSM 20280
35	DSM 20284
36	DSM 20284
37	FAM 13881
38	FAM 13881
39	FAM 19158
40	FAM 19158
41	DSM 20477
42	DSM 20477
43	FAM 1711
44	FAM 1711
45	FAM 19316
46	FAM 19316
47	DSM 20271
48	DSM 20271
49	FAM 15217.1
50	FAM 15217.1
51	FAM 15346
52	FAM 15346
53	DSM 2637
54	DSM 2637
55	FAM 1550
56	FAM 1550
57	FAM 22550
58	FAM 22550
59	ATCC 393
60	ATCC 393
61	FAM 20446	13.94				14.14	0.28
62	FAM 20446	14.33
63	DSM 20017
64	DSM 20017
65	DSM 15831
66	DSM 15831
67	FAM 14960
68	FAM 14960
69	DSM 20004
70	DSM 20004
71	NTC
72	NTC
Melt analysis of Melt A.Green (Ecfaeca_acuI)
No.	Name	Genotype	Peak 1
1	ATCC 19433		75.5
2	ATCC 19433		75.5
3	FAM 22123		75.5
4	FAM 22123		75.5
5	DSM 20376		75.5
6	DSM 20376		75.5
7	FAM 18867
8	FAM 18867
9	DSM 20054
10	DSM 20054
11	CCUG 33268
12	CCUG 33268
13	CCUG 48612
14	CCUG 48612
15	DSM 20072
16	DSM 20072
17	DSM 20074
18	DSM 20074
19	DSM 20081
20	DSM 20081
21	DSM 20346
22	DSM 20346
23	DSM 20484
24	DSM 20484
25	DSM 20343
26	DSM 20343
27	DSM 20241
28	DSM 20241
29	DSM 20336
30	DSM 20336
31	FAM 1903
32	FAM 1903
33	DSM 20280
34	DSM 20280
35	DSM 20284
36	DSM 20284
37	FAM 13881
38	FAM 13881
39	FAM 19158
40	FAM 19158
41	DSM 20477
42	DSM 20477
43	FAM 1711
44	FAM 1711
45	FAM 19316
46	FAM 19316
47	DSM 20271
48	DSM 20271
49	FAM 15217.1
50	FAM 15217.1
51	FAM 15346
52	FAM 15346
53	DSM 2637
54	DSM 2637
55	FAM 1550
56	FAM 1550
57	FAM 22550
58	FAM 22550
59	ATCC 393
60	ATCC 393
61	FAM 20446
62	FAM 20446
63	DSM 20017
64	DSM 20017
65	DSM 15831
66	DSM 15831
67	FAM 14960
68	FAM 14960
69	DSM 20004
70	DSM 20004
71	NTC
72	NTC

## Sheet: Ecfaeca_acuI_nontarget3
Excel Analysed Data Export
(C)Copyright 2003 Corbett Research, Pty Ltd. (R) All Rights Reserved.
File	Ecfaeca_acuI_nontarget3.rex
Date	09.01.2019
Time	10:40:31
Quantitative analysis of Cycling A.Green (Ecfaeca_acuI)
No.	Name	Ct	Given Conc (copies/reaction)	Calc Conc (copies/reaction)	% Var	Rep. Ct	Rep. Ct Std. Dev.	Rep. Ct (95% CI)	Rep. Calc. Conc.	Rep. Calc. Conc. (95% CI)
1	ATCC 19433	12.52				12.56	0.05
2	ATCC 19433	12.59
3	FAM 22123	14.75				14.73	0.02
4	FAM 22123	14.72
5	DSM 20376	13.01				12.97	0.06
6	DSM 20376	12.93
7	DSM 20001
8	DSM 20001
9	FAM 20761
10	FAM 20761
11	DSM 791
12	DSM 791
13	FAM 1318
14	FAM 1318
15	FAM 1351
16	FAM 1351
17	DSM 10702
18	DSM 10702
19	FAM 19008
20	FAM 19008
21	FAM 19012
22	FAM 19012
23	DSM 13528
24	DSM 13528
25	DSM 795
26	DSM 795
27	FAM 22878
28	FAM 22878
29	FAM 1748
30	FAM 1748
31	DSM 20633
32	DSM 20633
33	FAM 19822
34	FAM 19822
35	FAM 22256
36	FAM 22256
37	DSM 20079
38	DSM 20079
39	FAM 22749
40	FAM 22749
41	FAM 22751
42	FAM 22751
43	DSM 20531
44	DSM 20531
45	NCIMB 702745
46	NCIMB 702745
47	NCIMB 702663
48	NCIMB 702663
49	DSM 20057
50	DSM 20057
51	LMG 11439
52	LMG 11439	NaN
53	LMG 11985
54	LMG 11985
55	DSM 20584
56	DSM 20584
57	DSM 20356
58	DSM 20356
59	NCIMB 4504
60	NCIMB 4504
61	DSM 10532
62	DSM 10532
63	LMG 14751
64	LMG 14751
65	LMG 14754
66	LMG 14754
67	DSM 19284
68	DSM 19284
69	DSM 20719
70	DSM 20719
71	NTC
72	NTC
Melt analysis of Melt A.Green (Ecfaeca_acuI)
No.	Name	Genotype	Peak 1
1	ATCC 19433		75.5
2	ATCC 19433		75.5
3	FAM 22123		75.5
4	FAM 22123		75.5
5	DSM 20376		75.5
6	DSM 20376		75.5
7	DSM 20001
8	DSM 20001
9	FAM 20761
10	FAM 20761
11	DSM 791
12	DSM 791
13	FAM 1318
14	FAM 1318
15	FAM 1351
16	FAM 1351
17	DSM 10702
18	DSM 10702
19	FAM 19008
20	FAM 19008
21	FAM 19012
22	FAM 19012
23	DSM 13528
24	DSM 13528
25	DSM 795
26	DSM 795
27	FAM 22878
28	FAM 22878
29	FAM 1748
30	FAM 1748
31	DSM 20633
32	DSM 20633
33	FAM 19822
34	FAM 19822
35	FAM 22256
36	FAM 22256
37	DSM 20079
38	DSM 20079
39	FAM 22749
40	FAM 22749
41	FAM 22751
42	FAM 22751
43	DSM 20531
44	DSM 20531
45	NCIMB 702745
46	NCIMB 702745
47	NCIMB 702663
48	NCIMB 702663
49	DSM 20057
50	DSM 20057
51	LMG 11439
52	LMG 11439
53	LMG 11985
54	LMG 11985
55	DSM 20584
56	DSM 20584
57	DSM 20356
58	DSM 20356
59	NCIMB 4504
60	NCIMB 4504
61	DSM 10532
62	DSM 10532
63	LMG 14751
64	LMG 14751
65	LMG 14754
66	LMG 14754
67	DSM 19284
68	DSM 19284
69	DSM 20719
70	DSM 20719
71	NTC
72	NTC

## Sheet: Ecfaeca_acuI_nontarget4
Excel Analysed Data Export
(C)Copyright 2003 Corbett Research, Pty Ltd. (R) All Rights Reserved.
File	Ecfaeca_acuI_nontarget4.rex
Date	09.01.2019
Time	10:39:54
Quantitative analysis of Cycling A.Green (Ecfaeca_acuI)
No.	Name	Ct	Given Conc (copies/reaction)	Calc Conc (copies/reaction)	% Var	Rep. Ct	Rep. Ct Std. Dev.	Rep. Ct (95% CI)	Rep. Calc. Conc.	Rep. Calc. Conc. (95% CI)
1	ATCC 19433	12.58				12.48	0.14
2	ATCC 19433	12.38
3	FAM 22123	14.62				14.46	0.23
4	FAM 22123	14.30
5	DSM 20376	12.89				12.90	0.02
6	DSM 20376	12.91
7	DSM 20587
8	DSM 20587
9	DSM 27983
10	DSM 27983
11	DSM 20178	12.30				12.30
12	DSM 20178
13	DSM 20314
14	DSM 20314
15	FAM 6023
16	FAM 6023
17	FAM 20647
18	FAM 20647
19	DSM 20684
20	DSM 20684
21	FAM 2884
22	FAM 2884
23	FAM 18362
24	FAM 18362
25	FAM 21999
26	FAM 21999
27	DSM 5576
28	DSM 5576
29	DSM 20202
30	DSM 20202
31	DSM 20192
32	DSM 20192
33	FAM 22486
34	FAM 22486
35	DSM 20193
36	DSM 20193
37	FAM 23926
38	FAM 23926
39	FAM 23927
40	FAM 23927
41	DSM 18001
42	DSM 18001
43	FAM 18814
44	FAM 18814
45	DSM 4900
46	DSM 4900
47	DSM 20272
48	DSM 20272
49	DSM 20273
50	DSM 20273
51	DSM 20560
52	DSM 20560
53	FAM 22223
54	FAM 22223
55	NTC
56	NTC
Melt analysis of Melt A.Green (Ecfaeca_acuI)
No.	Name	Genotype	Peak 1
1	ATCC 19433		75.5
2	ATCC 19433		75.5
3	FAM 22123		75.5
4	FAM 22123		75.5
5	DSM 20376		75.5
6	DSM 20376		75.5
7	DSM 20587
8	DSM 20587
9	DSM 27983
10	DSM 27983
11	DSM 20178
12	DSM 20178
13	DSM 20314
14	DSM 20314
15	FAM 6023
16	FAM 6023
17	FAM 20647
18	FAM 20647
19	DSM 20684
20	DSM 20684
21	FAM 2884
22	FAM 2884
23	FAM 18362
24	FAM 18362
25	FAM 21999
26	FAM 21999
27	DSM 5576
28	DSM 5576
29	DSM 20202
30	DSM 20202
31	DSM 20192
32	DSM 20192
33	FAM 22486
34	FAM 22486
35	DSM 20193
36	DSM 20193
37	FAM 23926
38	FAM 23926
39	FAM 23927
40	FAM 23927
41	DSM 18001
42	DSM 18001
43	FAM 18814
44	FAM 18814
45	DSM 4900
46	DSM 4900
47	DSM 20272
48	DSM 20272
49	DSM 20273
50	DSM 20273
51	DSM 20560
52	DSM 20560
53	FAM 22223
54	FAM 22223
55	NTC
56	NTC

## Sheet: Ecfaeca_g3060_assay
Excel Analysed Data Export
(C)Copyright 2003 Corbett Research, Pty Ltd. (R) All Rights Reserved.
File	Ecfaeca_g3060_assay.rex
Date	08.01.2019
Time	16:15:25
Quantitative analysis of Cycling A.Green (Ecfaeca_g3060)
No.	Name	Ct	Given Conc (copies/reaction)	Calc Conc (copies/reaction)	% Var	Rep. Ct	Rep. Ct Std. Dev.	Rep. Ct (95% CI)	Rep. Calc. Conc.	Rep. Calc. Conc. (95% CI)
1	ATCC 19433	13.97				13.80	0.24
2	ATCC 19433	13.63
3	DSM 20380	12.55				12.62	0.10
4	DSM 20380	12.70
5	FAM 2922	13.72				13.64	0.11
6	FAM 2922	13.57
7	FAM 8254	14.08				14.13	0.07
8	FAM 8254	14.18
9	FAM 8493	14.95				14.84	0.17
10	FAM 8493	14.72
11	FAM 8494	12.95				12.91	0.05
12	FAM 8494	12.88
13	FAM 8495	14.80				14.90	0.14
14	FAM 8495	15.00
15	FAM 10310	15.41				15.59	0.26
16	FAM 10310	15.77
17	FAM 20649	13.59				13.59	0.00
18	FAM 20649	13.59
19	FAM 20853	14.27				14.24	0.04
20	FAM 20853	14.22
21	FAM 22123	14.36				14.34	0.02
22	FAM 22123	14.32
23	FAM 22196	13.97				13.87	0.15
24	FAM 22196	13.76
25	FAM 22219	14.03				14.08	0.06
26	FAM 22219	14.12
27	FAM 22220	15.98				16.00	0.03
28	FAM 22220	16.02
29	FAM 22237	13.19				13.11	0.11
30	FAM 22237	13.03
31	FAM 22739	15.74				15.63	0.16
32	FAM 22739	15.52
33	FAM 22965	14.27				14.32	0.08
34	FAM 22965	14.38
35	FAM 23457	13.71				13.78	0.10
36	FAM 23457	13.85
37	DSM 20060	14.76				14.46	0.42
38	DSM 20060	14.17
39	DSM 20376	13.29				13.09	0.27
40	DSM 20376	12.90
41	DSM 29488	14.47				14.47	0.01
42	DSM 29488	14.48
43	DSM 20371	13.88				13.94	0.09
44	DSM 20371	14.01
63	NTC
64	NTC
65	NTC
Melt analysis of Melt A.Green (Ecfaeca_g3060)
No.	Name	Genotype	Peak 1
1	ATCC 19433		75.5
2	ATCC 19433		75.0
3	DSM 20380		75.5
4	DSM 20380		75.3
5	FAM 2922		75.0
6	FAM 2922		75.0
7	FAM 8254		75.0
8	FAM 8254		75.0
9	FAM 8493		75.0
10	FAM 8493		75.0
11	FAM 8494		75.2
12	FAM 8494		75.0
13	FAM 8495		75.0
14	FAM 8495		75.0
15	FAM 10310		75.0
16	FAM 10310		75.0
17	FAM 20649		75.0
18	FAM 20649		75.2
19	FAM 20853		75.3
20	FAM 20853		75.3
21	FAM 22123		75.0
22	FAM 22123		75.0
23	FAM 22196		75.2
24	FAM 22196		74.8
25	FAM 22219		75.2
26	FAM 22219		75.2
27	FAM 22220		75.0
28	FAM 22220		75.0
29	FAM 22237		75.2
30	FAM 22237		75.2
31	FAM 22739		75.2
32	FAM 22739		75.0
33	FAM 22965		75.0
34	FAM 22965		75.0
35	FAM 23457		75.0
36	FAM 23457		75.0
37	DSM 20060		75.0
38	DSM 20060		75.0
39	DSM 20376		75.0
40	DSM 20376		75.0
41	DSM 29488		75.0
42	DSM 29488		75.0
43	DSM 20371		75.0
44	DSM 20371		75.0
63	NTC
64	NTC
65	NTC

## Sheet: Ecfaeca_g3060_typestrain_diluti
Excel Analysed Data Export
(C)Copyright 2003 Corbett Research, Pty Ltd. (R) All Rights Reserved.
File	Ecfaeca_g3060_typestrain_dilutions.rex
Date	22.01.2019
Time	16:39:43
Quantitative analysis of Cycling A.Green (Ecfaeca_g3060)
No.	Name	Ct	Given Conc (copies/reaction)	Calc Conc (copies/reaction)	% Var	Rep. Ct	Rep. Ct Std. Dev.	Rep. Ct (95% CI)	Rep. Calc. Conc.	Rep. Calc. Conc. (95% CI)
22	ATCC 19433 10^6	12.44	1.00E+06	9.53E+05	4.7%	12.46	0.09	[12.23 , 12.68]	9.44E+05	[4.21E+05 , 2.12E+06]
23	ATCC 19433 10^6	12.37	1.00E+06	9.99E+05	0.1%
24	ATCC 19433 10^6	12.55	1.00E+06	8.83E+05	11.7%
25	ATCC 19433 10^5	15.97	1.00E+05	8.69E+04	13.1%	15.77	0.19	[15.30 , 16.23]	9.94E+04	[5.40E+04 , 1.83E+05]
26	ATCC 19433 10^5	15.74	1.00E+05	1.01E+05	1.1%
27	ATCC 19433 10^5	15.60	1.00E+05	1.12E+05	11.7%
28	ATCC 19433 10^4	18.10	1.00E+04	2.04E+04	103.7%	18.93	0.72	[17.14 , 20.72]	1.16E+04	[7.14E+03 , 1.88E+04]
29	ATCC 19433 10^4	19.35	1.00E+04	8.68E+03	13.2%
30	ATCC 19433 10^4	19.34	1.00E+04	8.79E+03	12.1%
31	ATCC 19433 10^3	22.38	1.00E+03	1.11E+03	10.8%	22.64	0.22	[22.08 , 23.19]	9.32E+02	[5.76E+02 , 1.51E+03]
32	ATCC 19433 10^3	22.74	1.00E+03	8.68E+02	13.2%
33	ATCC 19433 10^3	22.79	1.00E+03	8.40E+02	16.0%
34	ATCC 19433 10^2	26.00	1.00E+02	9.45E+01	5.5%	25.90	0.20	[25.39 , 26.40]	1.02E+02	[5.53E+01 , 1.87E+02]
35	ATCC 19433 10^2	26.02	1.00E+02	9.33E+01	6.7%
36	ATCC 19433 10^2	25.66	1.00E+02	1.19E+02	19.3%
37	ATCC 19433 10^1	29.79	1.00E+01	7.19E+00	28.1%	29.35	0.40	[28.36 , 30.34]	9.72E+00	[4.30E+00 , 2.20E+01]
38	ATCC 19433 10^1	29.02	1.00E+01	1.22E+01	21.7%
39	ATCC 19433 10^1	29.24	1.00E+01	1.05E+01	5.0%
40	NTC
41	NTC
42	NTC
Melt analysis of Melt A.Green (Ecfaeca_g3060)
No.	Name	Genotype	Peak 1
22	ATCC 19433 10^6		74.8
23	ATCC 19433 10^6		74.8
24	ATCC 19433 10^6		74.8
25	ATCC 19433 10^5		74.8
26	ATCC 19433 10^5		74.8
27	ATCC 19433 10^5		74.8
28	ATCC 19433 10^4		74.8
29	ATCC 19433 10^4		74.8
30	ATCC 19433 10^4		74.8
31	ATCC 19433 10^3		74.8
32	ATCC 19433 10^3		74.8
33	ATCC 19433 10^3		74.7
34	ATCC 19433 10^2		74.0
35	ATCC 19433 10^2		74.0
36	ATCC 19433 10^2		74.2
37	ATCC 19433 10^1		74.5
38	ATCC 19433 10^1		74.5
39	ATCC 19433 10^1		74.3
40	NTC
41	NTC
42	NTC

## Sheet: Ecfaeca_g3060_nontarget1
Excel Analysed Data Export
(C)Copyright 2003 Corbett Research, Pty Ltd. (R) All Rights Reserved.
File	Ecfaeca_g3060_nontarget1.rex
Date	08.01.2019
Time	16:13:37
Quantitative analysis of Cycling A.Green (Ecfaeca_g3060)
No.	Name	Ct	Given Conc (copies/ul)	Calc Conc (copies/ul)	% Var	Rep. Ct	Rep. Ct Std. Dev.	Rep. Ct (95% CI)	Rep. Calc. Conc.	Rep. Calc. Conc. (95% CI)
1	ATCC 19433	12.97				12.93	0.05
2	ATCC 19433	12.90
3	FAM 22123	13.79				13.42	0.52
4	FAM 22123	13.05
5	DSM 20376	13.65				13.66	0.01
6	DSM 20376	13.67
7	ATCC 19435
8	ATCC 19435
9	FAM 17950
10	FAM 17950
11	FAM 23201
12	FAM 23201
13	DSM 20069
14	DSM 20069
15	FAM 17873
16	FAM 17873
17	FAM 23216
18	FAM 23216
19	DSM 5707	34.61				34.61
20	DSM 5707
21	FAM 21731	33.21				33.21
22	FAM 21731
23	FAM 21823
24	FAM 21823
25	DSM 20617
26	DSM 20617
27	FAM 10792
28	FAM 10792
29	FAM 21476
30	FAM 21476
31	DSM 5622	32.64				32.64
32	DSM 5622
33	FAM 18133.2	33.45				33.45
34	FAM 18133.2
35	FAM 19331
36	FAM 19331
37	DSM 20021	31.58				31.81	0.32
38	DSM 20021	32.04
39	FAM 19984
40	FAM 19984
41	FAM 22674
42	FAM 22674
43	DSM 20075
44	DSM 20075
45	FAM 13019
46	FAM 13019
47	FAM 19190
48	FAM 19190
49	DSM 20052
50	DSM 20052
51	FAM 11660
52	FAM 11660
53
54
55	DSM 20174	34.17				34.17
56	DSM 20174
57	ATCC 8014
58	ATCC 8014	33.31
59	FAM 18858
60	FAM 18858	31.63
61	DSM 10667
62	DSM 10667
63	DSM 10641
64	DSM 10641
65	FAM 18197
66	FAM 18197
67	DSM 20019
68	DSM 20019
69	FAM 18731
70	FAM 18731
71	NTC
72	NTC
Melt analysis of Melt A.Green (Ecfaeca_g3060)
No.	Name	Genotype	Peak 1
1	ATCC 19433		75.2
2	ATCC 19433		75.0
3	FAM 22123		75.0
4	FAM 22123		75.3
5	DSM 20376		75.0
6	DSM 20376		75.0
7	ATCC 19435
8	ATCC 19435
9	FAM 17950
10	FAM 17950
11	FAM 23201
12	FAM 23201
13	DSM 20069
14	DSM 20069
15	FAM 17873
16	FAM 17873
17	FAM 23216
18	FAM 23216
19	DSM 5707
20	DSM 5707
21	FAM 21731
22	FAM 21731
23	FAM 21823
24	FAM 21823
25	DSM 20617
26	DSM 20617
27	FAM 10792
28	FAM 10792
29	FAM 21476
30	FAM 21476
31	DSM 5622
32	DSM 5622
33	FAM 18133.2
34	FAM 18133.2
35	FAM 19331
36	FAM 19331
37	DSM 20021
38	DSM 20021
39	FAM 19984
40	FAM 19984
41	FAM 22674
42	FAM 22674
43	DSM 20075
44	DSM 20075
45	FAM 13019
46	FAM 13019
47	FAM 19190
48	FAM 19190
49	DSM 20052
50	DSM 20052
51	FAM 11660
52	FAM 11660
53
54
55	DSM 20174
56	DSM 20174
57	ATCC 8014
58	ATCC 8014
59	FAM 18858
60	FAM 18858
61	DSM 10667
62	DSM 10667
63	DSM 10641
64	DSM 10641
65	FAM 18197
66	FAM 18197
67	DSM 20019
68	DSM 20019
69	FAM 18731
70	FAM 18731
71	NTC
72	NTC

## Sheet: Ecfaeca_g3060_nontarget2
Excel Analysed Data Export
(C)Copyright 2003 Corbett Research, Pty Ltd. (R) All Rights Reserved.
File	Ecfaeca_g3060_nontarget2.rex
Date	22.01.2019
Time	16:34:20
Quantitative analysis of Cycling A.Green (Ecfaeca_g3060)
No.	Name	Ct	Given Conc (copies/ul)	Calc Conc (copies/ul)	% Var	Rep. Ct	Rep. Ct Std. Dev.	Rep. Ct (95% CI)	Rep. Calc. Conc.	Rep. Calc. Conc. (95% CI)
1	ATCC 19433	13.98				13.92	0.08
2	ATCC 19433	13.87
3	FAM 22123	13.16				13.23	0.11
4	FAM 22123	13.31
5	DSM 20376	13.82				13.82	0.00
6	DSM 20376	13.82
7	FAM 18867
8	FAM 18867	33.93
9	DSM 20054
10	DSM 20054
11	CCUG 33268	29.52				29.67	0.21
12	CCUG 33268	29.81
13	CCUG 48612	30.18				30.17	0.02
14	CCUG 48612	30.15
15	DSM 20072	30.26				30.34	0.11
16	DSM 20072	30.42
17	DSM 20074	27.90				27.87	0.03
18	DSM 20074	27.85
19	DSM 20081	29.86				30.10	0.34
20	DSM 20081	30.34
21	DSM 20346	34.70				34.70
22	DSM 20346
23	DSM 20484
24	DSM 20484
25	DSM 20343
26	DSM 20343
27	DSM 20241
28	DSM 20241
29	DSM 20336
30	DSM 20336
31	FAM 1903
32	FAM 1903
33	DSM 20280
34	DSM 20280	34.20
35	DSM 20284	34.81				34.81
36	DSM 20284
37	FAM 13881	33.83				33.83
38	FAM 13881
39	FAM 19158	31.66				31.58	0.11
40	FAM 19158	31.51
41	DSM 20477
42	DSM 20477
43	FAM 1711
44	FAM 1711
45	FAM 19316
46	FAM 19316
47	DSM 20271	32.45				32.45
48	DSM 20271
49	FAM 15217.1
50	FAM 15217.1
51	FAM 15346
52	FAM 15346
53	DSM 2637	30.52				30.22	0.43
54	DSM 2637	29.92
55	FAM 1550	31.04				30.63	0.59
56	FAM 1550	30.21
57	FAM 22550	31.21				31.06	0.22
58	FAM 22550	30.90
59	ATCC 393	27.05				26.96	0.13
60	ATCC 393	26.87
61	FAM 20446	28.04				27.89	0.21
62	FAM 20446	27.75
63	DSM 20017
64	DSM 20017
65	DSM 15831
66	DSM 15831
67	FAM 14960
68	FAM 14960
69	DSM 20004	29.32				29.84	0.73
70	DSM 20004	30.36
71	NTC
72	NTC
Melt analysis of Melt A.Green (Ecfaeca_g3060)
No.	Name	Genotype	Peak 1	Peak 2
1	ATCC 19433		75.0
2	ATCC 19433		75.0
3	FAM 22123		75.0
4	FAM 22123		75.0
5	DSM 20376		74.8
6	DSM 20376		75.0
7	FAM 18867
8	FAM 18867
9	DSM 20054
10	DSM 20054
11	CCUG 33268
12	CCUG 33268
13	CCUG 48612
14	CCUG 48612
15	DSM 20072
16	DSM 20072
17	DSM 20074		89.2
18	DSM 20074		89.3
19	DSM 20081
20	DSM 20081
21	DSM 20346
22	DSM 20346
23	DSM 20484
24	DSM 20484
25	DSM 20343
26	DSM 20343
27	DSM 20241
28	DSM 20241
29	DSM 20336
30	DSM 20336
31	FAM 1903
32	FAM 1903
33	DSM 20280
34	DSM 20280
35	DSM 20284
36	DSM 20284
37	FAM 13881
38	FAM 13881
39	FAM 19158
40	FAM 19158
41	DSM 20477
42	DSM 20477
43	FAM 1711
44	FAM 1711
45	FAM 19316
46	FAM 19316
47	DSM 20271
48	DSM 20271
49	FAM 15217.1
50	FAM 15217.1
51	FAM 15346
52	FAM 15346
53	DSM 2637
54	DSM 2637
55	FAM 1550
56	FAM 1550
57	FAM 22550
58	FAM 22550
59	ATCC 393		87.7	90.5
60	ATCC 393		87.7	90.5
61	FAM 20446
62	FAM 20446		90.7
63	DSM 20017
64	DSM 20017
65	DSM 15831
66	DSM 15831
67	FAM 14960
68	FAM 14960
69	DSM 20004
70	DSM 20004
71	NTC
72	NTC

[truncated: 38 more sheets: Ecfaeca_g3060_nontarget3, Ecfaeca_g3060_nontarget4, Ecfaeci_cysS_assay, Ecfaeci_cysS_typestrain_dilutio, Ecfaeci_cysS_nontarget1, Ecfaeci_cysS_nontarget2, Ecfaeci_cysS_nontarget3, Ecfaeci_cysS_nontarget4, Ecfaeci_purD_assay, Ecfaeci_purD_typestrain_dilu, Ecfaeci_purD_nontarget1, Ecfaeci_purD_nontarget2, Ecfaeci_purD_nontarget3, Ecfaeci_purD_nontarget4, Pdacidi_asnS_assay, Pdacidi_asnS_typestrain_dilutio, Pdacidi_asnS_nontarget1, Pdacidi_asnS_nontarget2, Pdacidi_asnS_nontarget3, Pdacidi_asnS_nontarget4 …]
