# Supplementary material for: SpeciesPrimer: a bioinformatics pipeline dedicated to the design of qPCR primers for the quantification of bacterial species
Source: PeerJ. 2020 Feb 18;8:e8544. doi: 10.7717/peerj.8544 (PMC7034379; doi:10.7717/peerj.8544)
Supplement: Dataset S7 — An overview of the in vitro validation qPCR results for the primer pairs Ec_faeca_acuI, Ec_faeca_g3060, Ec_faeci_cysS, Ec_faeci_purD, Pd_acidi_asnS, Pd_acidi_g1164, Pd_pento_nagK and Pd_pento_g4364. [file peerj-08-8544-s007.xlsx]

## Sheet: Ecfaeca_acuI_summary
Enterococcus faecalis			Assay:	Ecfaeca_acuI
Inclusivity							Legend
Strain	Cq	STD	Tm	STD			Reported as negative: signal below Cq 25 only in one reaction of duplicate, atypical curve shape, no melting curve peak
ATCC 19433	12.48	0.16	75.5	0			Reported as negative: signal below Cq 25, atypical curve shape, signal only in one reaction of duplicate, no melting curve peak
DSM 20380	14.61	0.04	75.5	0			Reported as negative: signal below Cq 25, artifact, atypical curve shape in both duplicates, no melting curve peak
FAM 2922	14.3	0.03	75.5	0
FAM 8254	14.1	0.03	75.5	0
FAM 8493	14.41	0.01	75.5	0
FAM 8494	14.38	0.01	75.5	0
FAM 8495	14.55	0.01	75.5	0
FAM 10310	15.46	0.06	75.5	0
FAM 20649	14.74	0.07	75.5	0
FAM 20853	15.45	0.01	75.5	0
FAM 22123	14.86	0.03	75.5	0
FAM 22196	14.88	0.02	75.5	0
FAM 22219	15.37	0.08	75.5	0
FAM 22220	15.52	0.03	75.5	0
FAM 22237	14.47	0.08	75.5	0
FAM 22739	15.34	0.25	75.5	0
FAM 22965	14.35	0.04	75.5	0
FAM 23457	14.18	0.12	75.5	0
DSM 20060	14.55	0.05	75.5	0
DSM 20376	13.16	0.14	75.5	0
DSM 29488	14.36	0.11	75.5	0
DSM 20371	14.62	0.04	75.5	0
NTC	35	0	0	0
Dynamic range and efficiency
Strain	Cq	STD	Tm	STD		R=	0.99909
ATCC 19433 1e+06 copies	11.78	0.17	75.5	0		R^2=	0.99818
ATCC 19433 1e+05 copies	15.05	0.12	75.5	0		M=	-3.382
ATCC 19433 1e+04 copies	18.68	0.07	75.5	0		B=	32.107
ATCC 19433 1e+03 copies	22.06	0.05	75.43	0.12		Efficiency	0.98
ATCC 19433 1e+02 copies	25.61	0.42	74.73	0.06
ATCC 19433 1e+01 copies	28.44	0.19	74.8	0
NTC	35	0	0	0
Exclusivity
Strain	Cq	STD	Tm	STD			Strain	Cq	STD	Tm	STD			Strain	Cq	STD	Tm	STD
ATCC 19435	35	0	0	0			DSM 20241	35	0	0	0			NCIMB 702745	35	0	0	0
FAM 17950	35	0	0	0			DSM 20336	35	0	0	0			NCIMB 702663	35	0	0	0
FAM 23201	35	0	0	0			DSM 20333	35	0	0	0			DSM 20057	35	0	0	0
DSM 20069	35	0	0	0			DSM 20280	35	0	0	0			LMG 11439	35	0	0	0
FAM 17873	35	0	0	0			DSM 20284	35	0	0	0			LMG 11985	35	0	0	0
FAM 23216	35	0	0	0			FAM 13881	35	0	0	0			DSM 20584	35	0	0	0
DSM 5707	35	0	0	0			FAM 19158	35	0	0	0			DSM 20356	35	0	0	0
FAM 21731	35	0	0	0			DSM 20477	35	0	0	0			NCIMB 4504	35	0	0	0
FAM 21823	35	0	0	0			FAM 1711	35	0	0	0			DSM 10532	35	0	0	0
DSM 20617	35	0	0	0			FAM 19316	35	0	0	0			LMG 14751	35	0	0	0
FAM 10792	35	0	0	0			DSM 20271	35	0	0	0			LMG 14754	35	0	0	0
FAM 21476	35	0	0	0			FAM 15217.1	35	0	0	0			DSM 19284	35	0	0	0
DSM 5622	35	0	0	0			FAM 15346	35	0	0	0			DSM 20719	35	0	0	0
FAM 18133.2	35	0	0	0			DSM 2637	35	0	0	0			DSM 20587	35	0	0	0
FAM 19331	35	0	0	0			FAM 1550	35	0	0	0			DSM 27983	35	0	0	0
DSM 20021	35	0	0	0			FAM 22550	35	0	0	0			DSM 20178	23.65	16.05	0	0
FAM 19984	35	0	0	0			ATCC 393	35	0	0	0			DSM 20314	35	0	0	0
FAM 22674	35	0	0	0			FAM 20446	14.13	0.28	0	0			FAM 6023	35	0	0	0
DSM 20075	35	0	0	0			DSM 20017	35	0	0	0			FAM 20647	35	0	0	0
FAM 13019	35	0	0	0			DSM 15831	35	0	0	0			DSM 20684	35	0	0	0
FAM 19190	35	0	0	0			FAM 14960	35	0	0	0			FAM 2884	35	0	0	0
DSM 20052	35	0	0	0			DSM 20004	35	0	0	0			FAM 18362	35	0	0	0
FAM 11660	35	0	0	0			DSM 20001	35	0	0	0			FAM 21999	35	0	0	0
DSM 20174	35	0	0	0			FAM 20761	35	0	0	0			DSM 5576	35	0	0	0
ATCC 8014	35	0	0	0			DSM 791	35	0	0	0			DSM 20202	35	0	0	0
FAM 18858	35	0	0	0			FAM 1318	35	0	0	0			DSM 20192	35	0	0	0
DSM 10667	35	0	0	0			FAM 1351	35	0	0	0			FAM 22486	35	0	0	0
DSM 10641	35	0	0	0			DSM 10702	35	0	0	0			DSM 20193	35	0	0	0
FAM 18197	35	0	0	0			FAM 19008	35	0	0	0			FAM 23926	35	0	0	0
DSM 20019	35	0	0	0			FAM 19012	35	0	0	0			FAM 23927	35	0	0	0
FAM 18731	35	0	0	0			DSM 13528	35	0	0	0			DSM 18001	35	0	0	0
FAM 18867	35	0	0	0			DSM 795	35	0	0	0			FAM 18814	35	0	0	0
DSM 20054	35	0	0	0			FAM 22878	35	0	0	0			DSM 4900	35	0	0	0
CCUG 33268	35	0	0	0			FAM 1748	35	0	0	0			DSM 20272	35	0	0	0
CCUG 48612	35	0	0	0			DSM 20633	35	0	0	0			DSM 20273	35	0	0	0
DSM 20072	35	0	0	0			FAM 19822	35	0	0	0			DSM 20560	35	0	0	0
DSM 20074	35	0	0	0			FAM 22256	35	0	0	0			FAM 22223	35	0	0	0
DSM 20081	35	0	0	0			DSM 20079	35	0	0	0			NTC	35	0	0	0
DSM 20346	35	0	0	0			FAM 22749	35	0	0	0			NTC	35	0	0	0
DSM 20484	35	0	0	0			FAM 22751	35	0	0	0			NTC	35	0	0	0
DSM 20343	35	0	0	0			DSM 20531	35	0	0	0			NTC	35	0	0	0
Run to run variation positive control
	ATCC 19433				FAM 22123				DSM 20376
	Cq	std	Tm	std	Cq	std	Tm	std	Cq	std	Tm	std
Run 1	12.48	0.16	75.5	0	14.86	0.03	75.5	0	13.16	0.14	75.5	0
Run 2	12.53	0.07	75.5	0	14.75	0.21	75.5	0	12.84	0.41	75.5	0
Run 3	12.48	0.17	75.5	0	14.69	0.06	75.5	0	13.03	0.06	75.5	0
Run 4	12.55	0.05	75.5	0	14.73	0.02	75.5	0	12.97	0.06	75.5	0
Run 5	12.48	0.14	75.5	0	14.46	0.23	75.5	0	12.9	0.01	75.5	0
Mean	12.5	0.03	75.5	0	14.7	0.15	75.5	0	12.98	0.12	75.5	0
Min	12.48		75.5		14.46		75.5		12.84		75.5
Max	12.55		75.5		14.86		75.5		13.16		75.5

## Sheet: Ecfaeca_g3060_summary
Enterococcus faecalis			Assay:	Ecfaeca_g3060
Inclusivity							Legend
Strain	Cq	STD	Tm	STD			Reported as negative: signal below Cq 25 only in one reaction of duplicate, atypical curve shape, no melting curve peak
ATCC 19433	13.8	0.24	75.25	0.35			Reported as negative: signal below Cq 25, atypical curve shape, signal only in one reaction of duplicate, no melting curve peak
DSM 20380	12.62	0.11	75.4	0.14			Reported as negative: signal below 25, artifact, atypical curve shape in both duplicates, no melting curve peak
FAM 2922	13.64	0.11	75	0
FAM 8254	14.13	0.07	75	0
FAM 8493	14.84	0.16	75	0
FAM 8494	12.91	0.05	75.1	0.14
FAM 8495	14.9	0.14	75	0
FAM 10310	15.59	0.25	75	0
FAM 20649	13.59	0	75.1	0.14
FAM 20853	14.25	0.04	75.3	0
FAM 22123	14.34	0.03	75	0
FAM 22196	13.87	0.15	75	0.28
FAM 22219	14.07	0.06	75.2	0
FAM 22220	16	0.03	75	0
FAM 22237	13.11	0.11	75.2	0
FAM 22739	15.63	0.16	75.1	0.14
FAM 22965	14.32	0.08	75	0
FAM 23457	13.78	0.1	75	0
DSM 20060	14.46	0.42	75	0
DSM 20376	13.09	0.28	75	0
DSM 29488	14.48	0.01	75	0
DSM 20371	13.95	0.09	75	0
NTC	35	0	0	0
Dynamic range and efficiency
Strain	Cq	STD	Tm	STD		R=	0.99849
ATCC 19433 1e+06 copies	12.45	0.09	74.8	0		R^2=	0.99689
ATCC 19433 1e+05 copies	15.77	0.19	74.8	0		M=	-3.387
ATCC 19433 1e+04 copies	18.93	0.72	74.8	0		B=	32.694
ATCC 19433 1e+03 copies	22.64	0.22	74.77	0.06		Efficiency	0.97
ATCC 19433 1e+02 copies	25.89	0.2	74.07	0.12
ATCC 19433 1e+01 copies	29.35	0.4	74.43	0.12
NTC	35	0	0	0
Exclusivity
Strain	Cq	STD	Tm	STD			Strain	Cq	STD	Tm	STD			Strain	Cq	STD	Tm	STD
ATCC 19435	35	0	0	0			DSM 20241	35	0	0	0			NCIMB 702745	34.29	1	0	0
FAM 17950	35	0	0	0			DSM 20336	35	0	0	0			NCIMB 702663	33.36	2.33	0	0
FAM 23201	35	0	0	0			DSM 20333	35	0	0	0			DSM 20057	34.14	1.22	0	0
DSM 20069	35	0	0	0			DSM 20280	34.6	0.57	0	0			LMG 11439	35	0	0	0
FAM 17873	35	0	0	0			DSM 20284	34.91	0.13	0	0			LMG 11985	35	0	0	0
FAM 23216	35	0	0	0			FAM 13881	34.41	0.83	0	0			DSM 20584	33.59	1.75	0	0
DSM 5707	34.8	0.28	0	0			FAM 19158	31.59	0.11	0	0			DSM 20356	34.07	0.14	0	0
FAM 21731	34.11	1.27	0	0			DSM 20477	35	0	0	0			NCIMB 4504	34.95	0.08	0	0
FAM 21823	35	0	0	0			FAM 1711	35	0	0	0			DSM 10532	35	0	0	0
DSM 20617	35	0	0	0			FAM 19316	35	0	0	0			LMG 14751	35	0	0	0
FAM 10792	35	0	0	0			DSM 20271	33.73	1.8	0	0			LMG 14754	33.38	2.3	0	0
FAM 21476	35	0	0	0			FAM 15217.1	35	0	0	0			DSM 19284	26.91	0.47	78.9	12.16
DSM 5622	33.82	1.67	0	0			FAM 15346	35	0	0	0			DSM 20719	34.77	0.33	0	0
FAM 18133.2	34.23	1.1	0	0			DSM 2637	30.22	0.42	0	0			DSM 20587	35	0	0	0
FAM 19331	35	0	0	0			FAM 1550	30.62	0.59	0	0			DSM 27983	32.35	1.74	0	0
DSM 20021	31.81	0.33	0	0			FAM 22550	31.05	0.22	0	0			DSM 20178	27.29	0.4	90.35	0.21
FAM 19984	35	0	0	0			ATCC 393	26.96	0.13	87.7	0			DSM 20314	32.37	0.95	0	0
FAM 22674	35	0	0	0			FAM 20446	27.89	0.21	45.35	64.13			FAM 6023	28.97	0.11	0	0
DSM 20075	35	0	0	0			DSM 20017	35	0	0	0			FAM 20647	33.64	1.61	0	0
FAM 13019	35	0	0	0			DSM 15831	35	0	0	0			DSM 20684	32.14	0.04	0	0
FAM 19190	35	0	0	0			FAM 14960	35	0	0	0			FAM 2884	35	0	0	0
DSM 20052	35	0	0	0			DSM 20004	29.84	0.74	0	0			FAM 18362	35	0	0	0
FAM 11660	35	0	0	0			DSM 20001	26.36	0.45	80.5	13.44			FAM 21999	35	0	0	0
DSM 20174	34.59	0.59	0	0			FAM 20761	32.47	1.04	0	0			DSM 5576	34.46	0.76	0	0
ATCC 8014	34.16	1.2	0	0			DSM 791	33.99	1.43	0	0			DSM 20202	28.87	0.06	0	0
FAM 18858	33.31	2.38	0	0			FAM 1318	35	0	0	0			DSM 20192	35	0	0	0
DSM 10667	35	0	0	0			FAM 1351	35	0	0	0			FAM 22486	34.05	1.34	0	0
DSM 10641	35	0	0	0			DSM 10702	35	0	0	0			DSM 20193	35	0	0	0
FAM 18197	35	0	0	0			FAM 19008	35	0	0	0			FAM 23926	35	0	0	0
DSM 20019	35	0	0	0			FAM 19012	35	0	0	0			FAM 23927	35	0	0	0
FAM 18731	35	0	0	0			DSM 13528	28.7	0.39	82	0			DSM 18001	35	0	0	0
FAM 18867	34.47	0.76	0	0			DSM 795	35	0	0	0			FAM 18814	35	0	0	0
DSM 20054	35	0	0	0			FAM 22878	35	0	0	0			DSM 4900	35	0	0	0
CCUG 33268	29.66	0.21	0	0			FAM 1748	35	0	0	0			DSM 20272	35	0	0	0
CCUG 48612	30.16	0.02	0	0			DSM 20633	27.32	0.57	77.5	8.91			DSM 20273	35	0	0	0
DSM 20072	30.34	0.11	0	0			FAM 19822	31.23	0.89	0	0			DSM 20560	35	0	0	0
DSM 20074	27.88	0.04	89.25	0.07			FAM 22256	27.58	0.06	83.9	0.14			FAM 22223	35	0	0	0
DSM 20081	30.1	0.34	0	0			DSM 20079	35	0	0	0			NTC	35	0	0	0
DSM 20346	34.85	0.21	0	0			FAM 22749	35	0	0	0			NTC	35	0	0	0
DSM 20484	35	0	0	0			FAM 22751	35	0	0	0			NTC	35	0	0	0
DSM 20343	35	0	0	0			DSM 20531	34.44	0.8	0	0			NTC	35	0	0	0
Run to run variation positive control
	ATCC 19433				FAM 22123				DSM 20376
	Cq	std	Tm	std	Cq	std	Tm	std	Cq	std	Tm	std
Run 1	13.8	0.24	75.25	0.35	14.34	0.03	75	0	13.09	0.28	75	0
Run 2	12.94	0.05	75.1	0.14	13.42	0.52	75.15	0.21	13.66	0.01	75	0
Run 3	13.93	0.08	75	0	13.23	0.11	75	0	13.82	0	74.9	0.14
Run 4	13.8	0.06	75	0	12.91	0.21	74.8	0	13.45	0.01	75	0
Run 5	13.68	0.24	75.1	0.14	13.16	0.49	74.8	0	13.5	0.2	74.8	0
Mean	13.63	0.4	75.09	0.1	13.41	0.55	74.95	0.15	13.5	0.27	74.94	0.09
Min	12.94		75		12.91		74.8		13.09		74.8
Max	13.93		75.25		14.34		75.15		13.82		75

## Sheet: Ecfaeci_cysS_summary
Enterococcus faecium			Assay:	Ecfaeci_cysS
Inclusivity							Legend
Strain	Cq	STD	Tm	STD			Reported as negative: signal below Cq 25 only in one reaction of duplicate, atypical curve shape, no melting curve peak
DSM 20477	12.27	0.27	80.6	0.14			Reported as negative: signal below Cq 25, atypical curve shape, signal only in one reaction of duplicate, no melting curve peak
FAM 1381	12.02	0.04	80.9	0.14			Reported as negative: signal below 25, artifact, atypical curve shape in both duplicates, no melting curve peak
FAM 1567	12.34	0.01	80.8	0
FAM 1711	12.26	0	80.75	0.07
FAM 1719	12.04	0.04	80.8	0
FAM 1818	11.67	0.03	80.9	0.14
FAM 2882	12	0.05	80.9	0.14
FAM 17414	11.72	0.04	80.9	0.14
FAM 17991	11.46	0.26	80.9	0.14
FAM 19316	11.89	0.11	80.8	0
FAM 20339	11.88	0.03	80.75	0.07
FAM 20680	10.64	0.1	80.8	0
FAM 20854	12.86	0.03	80.8	0
FAM 22738	11.71	0.08	80.8	0
DSM 2146	11.36	0.01	80.75	0.07
DSM 13589	13.27	0.06	80.75	0.07
DSM 13590	11.66	0.06	80.75	0.07
DSM 17050	12.07	0.06	80.8	0
DSM 25389	12.37	0.11	80.8	0
DSM 25390	11.16	0.09	80.6	0.14
DSM 25644	12.52	0.07	80.75	0.07
DSM 25697	11.95	0.02	80.8	0
DSM 25698	12.03	0.16	80.85	0.21
DSM 25699	11.84	0.04	80.85	0.21
DSM 25868	11.84	0.01	80.9	0.14
NTC	35	0	0	0
Dynamic range and efficiency
Strain	Cq	STD	Tm	STD		R=	0.99519
DSM 20477 1e+06 copies	11.18	0.1	80.63	0.12		R^2=	0.9904
DSM 20477 1e+05 copies	14.36	0.08	80.5	0		M=	-3.539
DSM 20477 1e+04 copies	17.53	0.12	80.4	0.17		B=	32.006
DSM 20477 1e+03 copies	21	0.07	80.43	0.12		Efficiency	0.92
DSM 20477 1e+02 copies	24.49	0.31	79.77	0.06
DSM 20477 1e+01 copies	29.18	1.17	80	0
NTC	35	0	0	0
Exclusivity
Strain	Cq	STD	Tm	STD			Strain	Cq	STD	Tm	STD			Strain	Cq	STD	Tm	STD
ATCC 19435	35	0	0	0			DSM 20241	35	0	0	0			NCIMB 702745	35	0	0	0
FAM 17950	35	0	0	0			DSM 20336	35	0	0	0			NCIMB 702663	35	0	0	0
FAM 23201	35	0	0	0			DSM 20333	34.8	0.29	0	0			DSM 20057	35	0	0	0
DSM 20069	35	0	0	0			DSM 20280	35	0	0	0			LMG 11439	34.47	0.75	0	0
FAM 17873	35	0	0	0			DSM 20284	35	0	0	0			LMG 11985	35	0	0	0
FAM 23216	35	0	0	0			FAM 13881	35	0	0	0			DSM 20584	35	0	0	0
DSM 5707	35	0	0	0			FAM 19158	35	0	0	0			DSM 20356	35	0	0	0
FAM 21731	35	0	0	0			ATCC 19433	35	0	0	0			NCIMB 4504	35	0	0	0
FAM 21823	35	0	0	0			FAM 22123	35	0	0	0			DSM 10532	35	0	0	0
DSM 20617	35	0	0	0			DSM 20376	35	0	0	0			LMG 14751	35	0	0	0
FAM 10792	35	0	0	0			DSM 20271	35	0	0	0			LMG 14754	35	0	0	0
FAM 21476	35	0	0	0			FAM 15217.1	35	0	0	0			DSM 19284	35	0	0	0
DSM 5622	35	0	0	0			FAM 15346	35	0	0	0			DSM 20719	35	0	0	0
FAM 18133.2	35	0	0	0			DSM 2637	35	0	0	0			DSM 20587	35	0	0	0
FAM 19331	35	0	0	0			FAM 1550	35	0	0	0			DSM 27983	34.27	1.04	0	0
DSM 20021	35	0	0	0			FAM 22550	35	0	0	0			DSM 20178	35	0	0	0
FAM 19984	35	0	0	0			ATCC 393	35	0	0	0			DSM 20314	35	0	0	0
FAM 22674	35	0	0	0			FAM 20446	35	0	0	0			FAM 6023	35	0	0	0
DSM 20075	35	0	0	0			DSM 20017	35	0	0	0			FAM 20647	35	0	0	0
FAM 13019	35	0	0	0			DSM 15831	35	0	0	0			DSM 20684	35	0	0	0
FAM 19190	35	0	0	0			FAM 14960	35	0	0	0			FAM 2884	35	0	0	0
DSM 20052	32.84	0.38	0	0			DSM 20004	35	0	0	0			FAM 18362	35	0	0	0
FAM 11660	35	0	0	0			DSM 20001	35	0	0	0			FAM 21999	35	0	0	0
DSM 20174	35	0	0	0			FAM 20761	35	0	0	0			DSM 5576	35	0	0	0
ATCC 8014	35	0	0	0			DSM 791	35	0	0	0			DSM 20202	35	0	0	0
FAM 18858	35	0	0	0			FAM 1318	35	0	0	0			DSM 20192	35	0	0	0
DSM 10667	35	0	0	0			FAM 1351	35	0	0	0			FAM 22486	35	0	0	0
DSM 10641	35	0	0	0			DSM 10702	35	0	0	0			DSM 20193	35	0	0	0
FAM 18197	35	0	0	0			FAM 19008	35	0	0	0			FAM 23926	35	0	0	0
DSM 20019	35	0	0	0			FAM 19012	35	0	0	0			FAM 23927	35	0	0	0
FAM 18731	35	0	0	0			DSM 13528	35	0	0	0			DSM 18001	32.3	3.83	0	0
FAM 18867	35	0	0	0			DSM 795	34.94	0.09	0	0			FAM 18814	24.1	8.68	0	0
DSM 20054	35	0	0	0			FAM 22878	35	0	0	0			DSM 4900	35	0	0	0
CCUG 33268	35	0	0	0			FAM 1748	35	0	0	0			DSM 20272	35	0	0	0
CCUG 48612	35	0	0	0			DSM 20633	35	0	0	0			DSM 20273	35	0	0	0
DSM 20072	35	0	0	0			FAM 19822	35	0	0	0			DSM 20560	35	0	0	0
DSM 20074	35	0	0	0			FAM 22256	35	0	0	0			FAM 22223	31.54	4.63	0	0
DSM 20081	35	0	0	0			DSM 20079	35	0	0	0			NTC	35	0	0	0
DSM 20346	35	0	0	0			FAM 22749	35	0	0	0			NTC	28.02	0.74	0	0
DSM 20484	35	0	0	0			FAM 22751	35	0	0	0			NTC	35	0	0	0
DSM 20343	35	0	0	0			DSM 20531	35	0	0	0			NTC	33.28	2.43	0	0
Run to run variation positive control
	DSM 20477				FAM 1711				FAM 19316
	Cq	std	Tm	std	Cq	std	Tm	std	Cq	std	Tm	std
Run 1	12.27	0.27	80.6	0.14	12.26	0	80.75	0.07	11.89	0.11	80.8	0
Run 2	12.14	0.16	80.7	0	12.13	0.02	81.1	0.14	11.31	0.01	81	0
Run 3	11.69	0.07	80.6	0.14	12.02	0.02	81	0	10.89	1.12	81.2	0
Run 4	11.91	0.02	80.6	0.14	12.1	0.1	81	0	11.69	0.07	80.9	0.14
Run 5	12.01	0.25	80.7	0	12.07	0.06	81	0	11	0.76	81	0
Mean	12	0.22	80.64	0.05	12.12	0.09	80.97	0.13	11.36	0.43	80.98	0.15
Min	11.69		80.6		12.02		80.75		10.89		80.8
Max	12.27		80.7		12.26		81.1		11.89		81.2

## Sheet: Ecfaeci_purD_summary
Enterococcus faecium			Assay:	Ecfaeci_purD
Inclusivity							Legend
Strain	Cq	STD	Tm	STD			Reported as negative: signal below Cq 25 only in one reaction of duplicate, atypical curve shape, no melting curve peak
DSM 20477	13.58	0.16	80.5	0			Reported as negative: signal below Cq 25, atypical curve shape, signal only in one reaction of duplicate, no melting curve peak
FAM 1381	12.94	0.14	80.5	0			Reported as negative: signal below 25, artifact, atypical curve shape in both duplicates, no melting curve peak
FAM 1567	14.21	0.02	80.5	0			1) One melting curve peak below threshold
FAM 1711	12.29	0.01	80.5	0
FAM 1719	12.47	0.14	80.5	0
FAM 1818	13.12	0.06	80.5	0
FAM 2882	35	0	0	0
FAM 17414	12.09	0	80.5	0
FAM 17991	13.19	0.03	80.5	0
FAM 19316	11.81	0.03	80.5	0
FAM 20339	12.73	0.25	80.4	0.14
FAM 20680	13.05	0.11	80.4	0.14
FAM 20854	13.32	0.16	80.4	0.14
FAM 22738	12.04	0.01	80.5	0
DSM 2146	13.36	0.28	80.35	0.21
DSM 13589	12.57	0.01	80.3	0
DSM 13590	13.07	0.01	80.3	0
DSM 17050	12.69	0.13	80.4	0.14
DSM 25389	12.66	0.04	80.35	0.21
DSM 25390	12.51	0.08	80.5	0
DSM 25644	13.38	0.18	80.4	0.14
DSM 25697	12.88	0.01	80.3	0
DSM 25698	13.03	0.18	80.3	0
DSM 25699	13.56	0.05	80.3	0
DSM 25868	12.52	0.01	80.4	0.14
NTC	35	0	0	0
Dynamic range and efficiency
Strain	Cq	STD	Tm	STD		R=	0.99813
DSM 20477 1e+06 copies	10.97	0.2	80.5	0		R^2=	0.99627
DSM 20477 1e+05 copies	13.98	0.09	80.5	0		M=	-3.396
DSM 20477 1e+04 copies	17.22	0.03	80.3	0		B=	31.051
DSM 20477 1e+03 copies	20.69	0.13	80.13	0.12		Efficiency	0.97
DSM 20477 1e+02 copies	24.26	0.3	79.5	0
DSM 20477 1e+01 copies	27.88	0.79	1) 53.2	46.07
NTC	35	0	0	0
Exclusivity
Strain	Cq	STD	Tm	STD			Strain	Cq	STD	Tm	STD			Strain	Cq	STD	Tm	STD
ATCC 19435	33.48	2.16	0	0			DSM 20241	35	0	0	0			NCIMB 702745	31.39	1.02	0	0
FAM 17950	35	0	0	0			DSM 20336	35	0	0	0			NCIMB 702663	35	0	0	0
FAM 23201	35	0	0	0			DSM 20333	33.34	2.34	0	0			DSM 20057	35	0	0	0
DSM 20069	35	0	0	0			DSM 20280	35	0	0	0			LMG 11439	26.61	11.87	0	0
FAM 17873	35	0	0	0			DSM 20284	35	0	0	0			LMG 11985	35	0	0	0
FAM 23216	35	0	0	0			FAM 13881	35	0	0	0			DSM 20584	35	0	0	0
DSM 5707	35	0	0	0			FAM 19158	35	0	0	0			DSM 20356	35	0	0	0
FAM 21731	35	0	0	0			ATCC 19433	35	0	0	0			NCIMB 4504	35	0	0	0
FAM 21823	35	0	0	0			FAM 22123	35	0	0	0			DSM 10532	35	0	0	0
DSM 20617	35	0	0	0			DSM 20376	35	0	0	0			LMG 14751	35	0	0	0
FAM 10792	35	0	0	0			DSM 20271	35	0	0	0			LMG 14754	35	0	0	0
FAM 21476	35	0	0	0			FAM 15217.1	35	0	0	0			DSM 19284	35	0	0	0
DSM 5622	35	0	0	0			FAM 15346	35	0	0	0			DSM 20719	35	0	0	0
FAM 18133.2	35	0	0	0			DSM 2637	35	0	0	0			DSM 20587	35	0	0	0
FAM 19331	35	0	0	0			FAM 1550	35	0	0	0			DSM 27983	34.3	0.98	0	0
DSM 20021	35	0	0	0			FAM 22550	35	0	0	0			DSM 20178	35	0	0	0
FAM 19984	35	0	0	0			ATCC 393	35	0	0	0			DSM 20314	35	0	0	0
FAM 22674	35	0	0	0			FAM 20446	35	0	0	0			FAM 6023	35	0	0	0
DSM 20075	35	0	0	0			DSM 20017	35	0	0	0			FAM 20647	35	0	0	0
FAM 13019	35	0	0	0			DSM 15831	35	0	0	0			DSM 20684	35	0	0	0
FAM 19190	35	0	0	0			FAM 14960	35	0	0	0			FAM 2884	35	0	0	0
DSM 20052	35	0	0	0			DSM 20004	35	0	0	0			FAM 18362	35	0	0	0
FAM 11660	35	0	0	0			DSM 20001	33.44	1.9	0	0			FAM 21999	35	0	0	0
DSM 20174	35	0	0	0			FAM 20761	35	0	0	0			DSM 5576	35	0	0	0
ATCC 8014	35	0	0	0			DSM 791	35	0	0	0			DSM 20202	35	0	0	0
FAM 18858	35	0	0	0			FAM 1318	35	0	0	0			DSM 20192	35	0	0	0
DSM 10667	35	0	0	0			FAM 1351	35	0	0	0			FAM 22486	35	0	0	0
DSM 10641	35	0	0	0			DSM 10702	35	0	0	0			DSM 20193	35	0	0	0
FAM 18197	35	0	0	0			FAM 19008	35	0	0	0			FAM 23926	35	0	0	0
DSM 20019	35	0	0	0			FAM 19012	35	0	0	0			FAM 23927	35	0	0	0
FAM 18731	35	0	0	0			DSM 13528	35	0	0	0			DSM 18001	35	0	0	0
FAM 18867	32.78	3.13	0	0			DSM 795	35	0	0	0			FAM 18814	23.83	15.8	0	0
DSM 20054	35	0	0	0			FAM 22878	35	0	0	0			DSM 4900	35	0	0	0
CCUG 33268	35	0	0	0			FAM 1748	35	0	0	0			DSM 20272	35	0	0	0
CCUG 48612	35	0	0	0			DSM 20633	35	0	0	0			DSM 20273	35	0	0	0
DSM 20072	35	0	0	0			FAM 19822	35	0	0	0			DSM 20560	35	0	0	0
DSM 20074	35	0	0	0			FAM 22256	35	0	0	0			FAM 22223	35	0	0	0
DSM 20081	35	0	0	0			DSM 20079	35	0	0	0			NTC	35	0	0	0
DSM 20346	35	0	0	0			FAM 22749	35	0	0	0			NTC	35	0	0	0
DSM 20484	35	0	0	0			FAM 22751	35	0	0	0			NTC	35	0	0	0
DSM 20343	35	0	0	0			DSM 20531	35	0	0	0			NTC	35	0	0	0
Run to run variation positive control
	DSM 20477				FAM 1711				FAM 19316
	Cq	std	Tm	std	Cq	std	Tm	std	Cq	std	Tm	std
Run 1	13.58	0.16	80.5	0	12.29	0.01	80.5	0	11.81	0.03	80.5	0
Run 2	13.75	0.37	80.25	0.07	12.27	0.11	80.3	0	11.78	0.19	80.3	0
Run 3	13.91	0.08	80.25	0.07	12.11	0.06	80.25	0.07	11.57	0.06	80.3	0
Run 4	13.2	0.46	80.4	0.14	12.09	0.07	80.4	0.14	12.68	0	80.4	0.14
Run 5	13.23	0.38	80.4	0.14	12.23	0.01	80.5	0	12.56	0.01	80.4	0.14
Mean	13.53	0.31	80.36	0.11	12.2	0.09	80.39	0.11	12.08	0.5	80.38	0.08
Min	13.2		80.25		12.09		80.25		11.57		80.3
Max	13.91		80.5		12.29		80.5		12.68		80.5

## Sheet: Pdacidi_asnS_summary
Pediococcus acidilactici			Assay:	Pdacidi_asnS
Inclusivity							Legend
Strain	Cq	STD	Tm	STD			Reported as negative: signal below Cq 25 only in one reaction of duplicate, atypical curve shape, no melting curve peak
DSM 20284	11.18	0.16	78.9	0.14			Reported as negative: signal below Cq 25, atypical curve shape, signal only in one reaction of duplicate, no melting curve peak
FAM 13875	11.17	0.04	79	0			Reported as negative: signal below 25, artifact, atypical curve shape in both duplicates, no melting curve peak
FAM 13881	12.38	0.01	78.8	0
FAM 17411	11.78	0.15	79.5	0
FAM 17708	11.66	0.12	78.8	0
FAM 18987	11.41	0.08	78.8	0
FAM 18988	11.47	0.09	78.9	0.14
FAM 19071	12.06	0.03	78.9	0.14
FAM 19158	10.68	0.06	79.5	0
FAM 19324	11.59	0.06	78.8	0
FAM 19475	12.73	0.06	78.8	0
FAM 19612	11.21	0.02	78.8	0
FAM 19641	12.1	0.06	78.75	0.07
FAM 19852	11.57	0.06	78.8	0
FAM 19882	12	0.01	78.75	0.07
FAM 20284	11.3	0.04	78.8	0
FAM 20325	11.5	0.03	78.8	0
FAM 20557	11.46	0.04	78.8	0
FAM 20623	11.48	0.12	78.9	0.14
FAM 22234	11.38	0.05	78.8	0
FAM 22235	11.38	0.05	78.8	0
NTC	35	0	0	0
Dynamic range and efficiency
Strain	Cq	STD	Tm	STD		R=	0.99861
DSM 20284 1e+06 copies	11.07	0.05	78.7	0		R^2=	0.99722
DSM 20284 1e+05 copies	13.85	0.09	78.7	0		M=	-3.356
DSM 20284 1e+04 copies	17.12	0.13	78.7	0		B=	30.835
DSM 20284 1e+03 copies	20.78	0.24	78.7	0		Efficiency	0.99
DSM 20284 1e+02 copies	23.92	0.02	78.3	0
DSM 20284 1e+01 copies	27.79	0.37	78.37	0.12
NTC	35	0	0	0
Exclusivity
Strain	Cq	STD	Tm	STD			Strain	Cq	STD	Tm	STD			Strain	Cq	STD	Tm	STD
ATCC 19435	35	0	0	0			DSM 20241	35	0	0	0			NCIMB 702745	35	0	0	0
FAM 17950	35	0	0	0			DSM 20336	35	0	0	0			NCIMB 702663	35	0	0	0
FAM 23201	35	0	0	0			DSM 20333	35	0	0	0			DSM 20057	35	0	0	0
DSM 20069	35	0	0	0			DSM 20280	35	0	0	0			LMG 11439	35	0	0	0
FAM 17873	35	0	0	0			ATCC 19433	35	0	0	0			LMG 11985	35	0	0	0
FAM 23216	35	0	0	0			FAM 22123	35	0	0	0			DSM 20584	35	0	0	0
DSM 5707	35	0	0	0			DSM 20376	35	0	0	0			DSM 20356	35	0	0	0
FAM 21731	35	0	0	0			DSM 20477	35	0	0	0			NCIMB 4504	35	0	0	0
FAM 21823	35	0	0	0			FAM 1711	35	0	0	0			DSM 10532	35	0	0	0
DSM 20617	35	0	0	0			FAM 19316	35	0	0	0			LMG 14751	35	0	0	0
FAM 10792	35	0	0	0			DSM 20271	35	0	0	0			LMG 14754	35	0	0	0
FAM 21476	35	0	0	0			FAM 15217.1	35	0	0	0			DSM 19284	35	0	0	0
DSM 5622	35	0	0	0			FAM 15346	35	0	0	0			DSM 20719	35	0	0	0
FAM 18133.2	35	0	0	0			DSM 2637	35	0	0	0			DSM 20587	35	0	0	0
FAM 19331	35	0	0	0			FAM 1550	35	0	0	0			DSM 27983	35	0	0	0
DSM 20021	35	0	0	0			FAM 22550	35	0	0	0			DSM 20178	35	0	0	0
FAM 19984	35	0	0	0			ATCC 393	35	0	0	0			DSM 20314	35	0	0	0
FAM 22674	35	0	0	0			FAM 20446	35	0	0	0			FAM 6023	35	0	0	0
DSM 20075	35	0	0	0			DSM 20017	35	0	0	0			FAM 20647	35	0	0	0
FAM 13019	35	0	0	0			DSM 15831	35	0	0	0			DSM 20684	35	0	0	0
FAM 19190	35	0	0	0			FAM 14960	35	0	0	0			FAM 2884	35	0	0	0
DSM 20052	35	0	0	0			DSM 20004	35	0	0	0			FAM 18362	35	0	0	0
FAM 11660	35	0	0	0			DSM 20001	35	0	0	0			FAM 21999	35	0	0	0
DSM 20174	35	0	0	0			FAM 20761	35	0	0	0			DSM 5576	35	0	0	0
ATCC 8014	35	0	0	0			DSM 791	35	0	0	0			DSM 20202	35	0	0	0
FAM 18858	34.27	1.03	0	0			FAM 1318	35	0	0	0			DSM 20192	35	0	0	0
DSM 10667	35	0	0	0			FAM 1351	35	0	0	0			FAM 22486	35	0	0	0
DSM 10641	35	0	0	0			DSM 10702	35	0	0	0			DSM 20193	35	0	0	0
FAM 18197	35	0	0	0			FAM 19008	35	0	0	0			FAM 23926	35	0	0	0
DSM 20019	35	0	0	0			FAM 19012	35	0	0	0			FAM 23927	35	0	0	0
FAM 18731	35	0	0	0			DSM 13528	35	0	0	0			DSM 18001	35	0	0	0
FAM 18867	35	0	0	0			DSM 795	35	0	0	0			FAM 18814	22.54	17.62	0	0
DSM 20054	35	0	0	0			FAM 22878	35	0	0	0			DSM 4900	35	0	0	0
CCUG 33268	35	0	0	0			FAM 1748	35	0	0	0			DSM 20272	35	0	0	0
CCUG 48612	35	0	0	0			DSM 20633	35	0	0	0			DSM 20273	35	0	0	0
DSM 20072	33.42	2.23	0	0			FAM 19822	35	0	0	0			DSM 20560	35	0	0	0
DSM 20074	35	0	0	0			FAM 22256	35	0	0	0			FAM 22223	35	0	0	0
DSM 20081	35	0	0	0			DSM 20079	35	0	0	0			NTC	35	0	0	0
DSM 20346	35	0	0	0			FAM 22749	35	0	0	0			NTC	35	0	0	0
DSM 20484	35	0	0	0			FAM 22751	35	0	0	0			NTC	35	0	0	0
DSM 20343	34.66	0.47	0	0			DSM 20531	35	0	0	0			NTC	35	0	0	0
Run to run variation positive control
	DSM 20284				FAM 13881				FAM 19158
	Cq	std	Tm	std	Cq	std	Tm	std	Cq	std	Tm	std
Run 1	11.18	0.16	78.9	0.14	12.38	0.01	78.8	0	10.68	0.06	79.5	0
Run 2	11.11	0.01	78.8	0	12.36	0.11	78.75	0.07	10.54	0.02	79.5	0
Run 3	11.16	0.29	78.8	0	12.26	0.06	78.8	0	10.48	0.05	79.5	0
Run 4	10.75	0.06	78.8	0	12.39	0.39	79	0	10.91	0.77	79.3	0
Run 5	10.97	0.3	78.75	0.07	12.36	0.06	78.75	0.07	11.65	0.06	79.5	0
Mean	11.03	0.18	78.81	0.05	12.35	0.05	78.82	0.1	10.85	0.48	79.46	0.09
Min	10.75		78.75		12.26		78.75		10.48		79.3
Max	11.18		78.9		12.39		79		11.65		79.5

## Sheet: Pdacidi_g1164_summary
Pediococcus acidilactici			Assay:	Pdacidi_g1164
Inclusivity							Legend
Strain	Cq	STD	Tm	STD			Reported as negative: signal below Cq 25 only in one reaction of duplicate, atypical curve shape, no melting curve peak
DSM 20284	10.35	0.14	82.6	0.14			Reported as negative: signal below Cq 25, atypical curve shape, signal only in one reaction of duplicate, no melting curve peak
FAM 13875	11.32	0.05	82.7	0			Reported as negative: signal below 25, artifact, atypical curve shape in both duplicates, no melting curve peak
FAM 13881	12.4	0.08	82.7	0			1) Only one melting curve peak above threshold
FAM 17411	11.93	0.12	82.6	0.14
FAM 17708	11.6	0.07	82.9	0.14
FAM 18987	11.46	0.01	83.1	0.14
FAM 18988	11.62	0.05	82.5	0
FAM 19071	12.23	0.01	82.5	0
FAM 19158	10.71	0.04	82.5	0
FAM 19324	11.7	0.2	83	0
FAM 19475	12.67	0.03	82.5	0
FAM 19612	11.3	0.54	82.5	0
FAM 19641	12.2	0.04	83	0
FAM 19852	11.54	0.09	82.5	0
FAM 19882	11.52	0.08	82.9	0.14
FAM 20284	11.21	0.01	82.5	0
FAM 20325	11.43	0.06	82.4	0.14
FAM 20557	11.5	0.06	82.5	0
FAM 20623	11.46	0.01	82.4	0.14
FAM 22234	11.45	0.06	82.5	0
FAM 22235	11.45	0.06	82.5	0
NTC	35	0	0	0
Dynamic range and efficiency
Strain	Cq	STD	Tm	STD		R=	0.99739
DSM 20284 1e+06 copies	10.48	0.7	82.07	0.12		R^2=	0.9948
DSM 20284 1e+05 copies	13.34	0.66	82.07	0.12		M=	-3.329
DSM 20284 1e+04 copies	17.03	0.09	82	0		B=	30.282
DSM 20284 1e+03 copies	20.33	0.08	82	0		Efficiency	1
DSM 20284 1e+02 copies	23.67	0.2	81.3	0.17
DSM 20284 1e+01 copies	26.93	0.6	81.57	0.12
NTC	35	0	0	0
Exclusivity
Strain	Cq	STD	Tm	STD			Strain	Cq	STD	Tm	STD			Strain	Cq	STD	Tm	STD
ATCC 19435	35	0	0	0			DSM 20241	35	0	0	0			NCIMB 702745	35	0	0	0
FAM 17950	35	0	0	0			DSM 20336	35	0	0	0			NCIMB 702663	35	0	0	0
FAM 23201	35	0	0	0			DSM 20333	35	0	0	0			DSM 20057	35	0	0	0
DSM 20069	35	0	0	0			DSM 20280	35	0	0	0			LMG 11439	35	0	0	0
FAM 17873	35	0	0	0			ATCC 19433	35	0	0	0			LMG 11985	35	0	0	0
FAM 23216	35	0	0	0			FAM 22123	32.71	1.88	0	0			DSM 20584	35	0	0	0
DSM 5707	35	0	0	0			DSM 20376	35	0	0	0			DSM 20356	35	0	0	0
FAM 21731	35	0	0	0			DSM 20477	35	0	0	0			NCIMB 4504	2) 33.94	1.51	0	0
FAM 21823	35	0	0	0			FAM 1711	35	0	0	0			DSM 10532	35	0	0	0
DSM 20617	35	0	0	0			FAM 19316	35	0	0	0			LMG 14751	2) 33.48	2.14	0	0
FAM 10792	35	0	0	0			DSM 20271	35	0	0	0			LMG 14754	35	0	0	0
FAM 21476	35	0	0	0			FAM 15217.1	35	0	0	0			DSM 19284	35	0	0	0
DSM 5622	22.66	0.11	86.25	0.07			FAM 15346	35	0	0	0			DSM 20719	35	0	0	0
FAM 18133.2	22.46	0.24	86.3	0			DSM 2637	35	0	0	0			DSM 20587	35	0	0	0
FAM 19331	21.03	0.03	86.4	0.14			FAM 1550	35	0	0	0			DSM 27983	33.16	0.8	0	0
DSM 20021	27.51	0.17	1) 88.7	-			FAM 22550	35	0	0	0			DSM 20178	33.66	1.28	0	0
FAM 19984	34.97	0.05	0	0			ATCC 393	31.48	0.25	0	0			DSM 20314	22.63	0.11	91	0
FAM 22674	35	0	0	0			FAM 20446	33.62	1.95	0	0			FAM 6023	34.9	0.14	0	0
DSM 20075	35	0	0	0			DSM 20017	35	0	0	0			FAM 20647	28.29	0.21	0	0
FAM 13019	35	0	0	0			DSM 15831	35	0	0	0			DSM 20684	35	0	0	0
FAM 19190	35	0	0	0			FAM 14960	35	0	0	0			FAM 2884	35	0	0	0
DSM 20052	35	0	0	0			DSM 20004	31.57	0.54	0	0			FAM 18362	35	0	0	0
FAM 11660	29.55	0.3	0	0			DSM 20001	29.66	0.43	0	0			FAM 21999	35	0	0	0
DSM 20174	35	0	0	0			FAM 20761	31.22	1.65	0	0			DSM 5576	35	0	0	0
ATCC 8014	35	0	0	0			DSM 791	35	0	0	0			DSM 20202	28.84	0.01	0	0
FAM 18858	35	0	0	0			FAM 1318	35	0	0	0			DSM 20192	35	0	0	0
DSM 10667	30.73	0.03	0	0			FAM 1351	35	0	0	0			FAM 22486	35	0	0	0
DSM 10641	29.69	0.28	0	0			DSM 10702	35	0	0	0			DSM 20193	35	0	0	0
FAM 18197	29.85	0.23	0	0			FAM 19008	35	0	0	0			FAM 23926	35	0	0	0
DSM 20019	33.73	1.8	0	0			FAM 19012	35	0	0	0			FAM 23927	35	0	0	0
FAM 18731	31.16	0.54	0	0			DSM 13528	35	0	0	0			DSM 18001	35	0	0	0
FAM 18867	35	0	0	0			DSM 795	35	0	0	0			FAM 18814	21.25	19.44	0	0
DSM 20054	35	0	0	0			FAM 22878	35	0	0	0			DSM 4900	35	0	0	0
CCUG 33268	31.23	0.47	0	0			FAM 1748	35	0	0	0			DSM 20272	35	0	0	0
CCUG 48612	31.29	0.94	0	0			DSM 20633	35	0	0	0			DSM 20273	35	0	0	0
DSM 20072	34.68	0.45	0	0			FAM 19822	35	0	0	0			DSM 20560	35	0	0	0
DSM 20074	35	0	0	0			FAM 22256	35	0	0	0			FAM 22223	35	0	0	0
DSM 20081	35	0	0	0			DSM 20079	35	0	0	0			NTC	35	0	0	0
DSM 20346	35	0	0	0			FAM 22749	35	0	0	0			NTC	33.96	1.47	0	0
DSM 20484	35	0	0	0			FAM 22751	35	0	0	0			NTC	35	0	0	0
DSM 20343	35	0	0	0			DSM 20531	35	0	0	0			NTC	35	0	0	0
Run to run variation positive control
	DSM 20284				FAM 13881				FAM 19158
	Cq	std	Tm	std	Cq	std	Tm	std	Cq	std	Tm	std
Run 1	10.35	0.14	82.6	0.14	12.4	0.08	82.7	0	10.71	0.04	82.5	0
Run 2	10.26	0.06	82.5	0	12.24	0.1	82.5	0	10.66	0.12	82.5	0
Run 3	9.84	0.06	82.1	0.14	12.21	0.01	82.1	0.14	10.47	0.08	82.2	0
Run 4	10.35	0.04	82.15	0.21	12.07	0.04	82.25	0.07	10.43	0.07	82.2	0
Run 5	11.17	0.17	82.2	0	12.1	0.06	82.2	0	10.54	0.03	82.25	0.07
Mean	10.39	0.48	82.31	0.22	12.2	0.13	82.35	0.24	10.56	0.12	82.33	0.16
Min	9.84		82.1		12.07		82.1		10.43		82.2
Max	11.17		82.6		12.4		82.7		10.71		82.5

## Sheet: Pdpento_nagK_summary
Pediococcus pentosaceus			Assay:	Pdpento_nagK
Inclusivity							Legend
Strain	Cq	STD	Tm	STD			Reported as negative: signal below Cq 25 only in one reaction of duplicate, atypical curve shape, no melting curve peak
DSM 20336	11.7	0.02	83.5	0			Reported as negative: signal below Cq 25, atypical curve shape, signal only in one reaction of duplicate, no melting curve peak
DSM 20333	11.69	0.11	83.4	0.14			Reported as negative: signal below 25, artifact, atypical curve shape in both duplicates, no melting curve peak
FAM 13073	12.72	0.04	83.25	0.07
FAM 13874	12.08	0.04	82.7	0
FAM 17622	12.7	0.13	83.25	0.07
FAM 18047	11.28	0.03	83.3	0
FAM 18048	11.54	0.14	83.25	0.07
FAM 18049	11.26	0.01	83.15	0.21
FAM 18051	11.29	0.04	83.3	0
FAM 18321	12.31	0.08	83.3	0
FAM 18327	12.41	0.07	83.25	0.07
FAM 18747	13.07	0.06	82.7	0
FAM 18813	14.29	0.33	83.15	0.21
FAM 18909	11.7	0.02	83.3	0
FAM 18965	13.18	0.01	82.7	0
FAM 19052	12.97	0.03	83.1	0.14
FAM 19132	12.97	0.16	82.7	0
FAM 19144	12.57	0.15	83.2	0
FAM 19161	14.42	0.1	82.7	0
FAM 19164	12.5	0.02	83.15	0.21
FAM 19167	13.95	0.12	83	0
FAM 19169	12.41	0.01	83.2	0
FAM 20650	13.06	0.21	83.25	0.07
FAM 22491	12	0.09	83.1	0.14
DSM 20280	11.24	0.06	83.25	0.07
NTC	34.92	0.14	0	0
Dynamic range and efficiency
Strain	Cq	STD	Tm	STD		R=	0.99812
DSM 20336 1e+06 copies	11.32	0.06	83.2	0		R^2=	0.99624
DSM 20336 1e+05 copies	14.61	0.08	83.13	0.12		M=	-3.47
DSM 20336 1e+04 copies	19.01	0.06	83.07	0.12		B=	32.286
DSM 20336 1e+03 copies	22.01	0.04	82.87	0.12		Efficiency	0.94
DSM 20336 1e+02 copies	25.26	0.12	82.7	0
DSM 20336 1e+01 copies	28.62	0.59	83	0
NTC	34.92	0.14	0	0
Exclusivity
Strain	Cq	STD	Tm	STD			Strain	Cq	STD	Tm	STD			Strain	Cq	STD	Tm	STD
ATCC 19435	35	0	0	0			DSM 20241	35	0	0	0			NCIMB 702745	35	0	0	0
FAM 17950	35	0	0	0			DSM 20284	35	0	0	0			NCIMB 702663	35	0	0	0
FAM 23201	35	0	0	0			FAM 13881	35	0	0	0			DSM 20057	35	0	0	0
DSM 20069	35	0	0	0			FAM 19158	35	0	0	0			LMG 11439	35	0	0	0
FAM 17873	35	0	0	0			ATCC 19433	32	0.03	0	0			LMG 11985	35	0	0	0
FAM 23216	35	0	0	0			FAM 22123	35	0	0	0			DSM 20584	35	0	0	0
DSM 5707	35	0	0	0			DSM 20376	31.31	1.1	0	0			DSM 20356	35	0	0	0
FAM 21731	35	0	0	0			DSM 20477	35	0	0	0			NCIMB 4504	35	0	0	0
FAM 21823	35	0	0	0			FAM 1711	35	0	0	0			DSM 10532	35	0	0	0
DSM 20617	35	0	0	0			FAM 19316	34.17	1.17	0	0			LMG 14751	35	0	0	0
FAM 10792	35	0	0	0			DSM 20271	35	0	0	0			LMG 14754	35	0	0	0
FAM 21476	35	0	0	0			FAM 15217.1	35	0	0	0			DSM 19284	35	0	0	0
DSM 5622	34.39	0.86	0	0			FAM 15346	35	0	0	0			DSM 20719	35	0	0	0
FAM 18133.2	35	0	0	0			DSM 2637	35	0	0	0			DSM 20587	35	0	0	0
FAM 19331	35	0	0	0			FAM 1550	34.08	1.3	0	0			DSM 27983	33.66	1.89	0	0
DSM 20021	35	0	0	0			FAM 22550	35	0	0	0			DSM 20178	35	0	0	0
FAM 19984	35	0	0	0			ATCC 393	34.52	0.69	0	0			DSM 20314	35	0	0	0
FAM 22674	34	1.41	0	0			FAM 20446	35	0	0	0			FAM 6023	35	0	0	0
DSM 20075	35	0	0	0			DSM 20017	35	0	0	0			FAM 20647	35	0	0	0
FAM 13019	35	0	0	0			DSM 15831	35	0	0	0			DSM 20684	35	0	0	0
FAM 19190	35	0	0	0			FAM 14960	35	0	0	0			FAM 2884	35	0	0	0
DSM 20052	35	0	0	0			DSM 20004	35	0	0	0			FAM 18362	35	0	0	0
FAM 11660	35	0	0	0			DSM 20001	28.98	0.45	0	0			FAM 21999	35	0	0	0
DSM 20174	35	0	0	0			FAM 20761	30.02	0.21	0	0			DSM 5576	35	0	0	0
ATCC 8014	35	0	0	0			DSM 791	35	0	0	0			DSM 20202	35	0	0	0
FAM 18858	31.26	0.23	0	0			FAM 1318	35	0	0	0			DSM 20192	28.28	2.01	85	0
DSM 10667	35	0	0	0			FAM 1351	35	0	0	0			FAM 22486	26.58	0.31	84.9	0.14
DSM 10641	35	0	0	0			DSM 10702	35	0	0	0			DSM 20193	35	0	0	0
FAM 18197	35	0	0	0			FAM 19008	35	0	0	0			FAM 23926	35	0	0	0
DSM 20019	35	0	0	0			FAM 19012	35	0	0	0			FAM 23927	35	0	0	0
FAM 18731	35	0	0	0			DSM 13528	35	0	0	0			DSM 18001	35	0	0	0
FAM 18867	32.78	0.45	0	0			DSM 795	35	0	0	0			FAM 18814	35	0	0	0
DSM 20054	35	0	0	0			FAM 22878	35	0	0	0			DSM 4900	35	0	0	0
CCUG 33268	33.05	0.62	0	0			FAM 1748	35	0	0	0			DSM 20272	35	0	0	0
CCUG 48612	32.82	0.65	0	0			DSM 20633	35	0	0	0			DSM 20273	35	0	0	0
DSM 20072	35	0	0	0			FAM 19822	35	0	0	0			DSM 20560	35	0	0	0
DSM 20074	35	0	0	0			FAM 22256	35	0	0	0			FAM 22223	35	0	0	0
DSM 20081	35	0	0	0			DSM 20079	35	0	0	0			NTC	35	0	0	0
DSM 20346	35	0	0	0			FAM 22749	35	0	0	0			NTC	31.15	0.42	0	0
DSM 20484	35	0	0	0			FAM 22751	35	0	0	0			NTC	35	0	0	0
DSM 20343	35	0	0	0			DSM 20531	35	0	0	0			NTC	35	0	0	0
Run to run variation positive control
	DSM 20336				DSM 20333				DSM 20280
	Cq	std	Tm	std	Cq	std	Tm	std	Cq	std	Tm	std
Run 1	11.7	0.02	83.5	0	11.69	0.11	83.4	0.14	11.24	0.06	83.25	0.07
Run 2	11.77	0.04	83.5	0	11.9	0.03	83.5	0	11.18	0.03	83.4	0.14
Run 3	11.89	0.03	83.5	0	11.88	0.11	83.5	0	10.79	0.02	83.3	0
Run 4	11.77	0.18	83.4	0.14	11.36	0.04	83.3	0	11.68	0.11	83.3	0
Run 5	11.52	0.11	83.5	0	11.3	0.16	83.4	0.14	11.41	0.17	83.25	0.07
Mean	11.73	0.14	83.48	0.04	11.63	0.28	83.42	0.08	11.26	0.33	83.3	0.06
Min	11.52		83.4		11.3		83.3		10.79		83.25
Max	11.89		83.5		11.9		83.5		11.68		83.4

## Sheet: Pdpento_g4364_summary
Pediococcus pentosaceus			Assay:	Pdpento_g4364
Inclusivity							Legend
Strain	Cq	STD	Tm	STD			Reported as negative: signal below Cq 25 only in one reaction of duplicate, atypical curve shape, no melting curve peak
DSM 20336	12.18	0.03	79.3	0			Reported as negative: signal below Cq 25, atypical curve shape, signal only in one reaction of duplicate, no melting curve peak
DSM 20333	12.05	0.12	79.25	0.07			Reported as negative: signal below 25, artifact, atypical curve shape in both duplicates, no melting curve peak
FAM 13073	13.34	0.06	79	0			1) Only one melting curve peak above threshold
FAM 13874	12.8	0.21	78.85	0.21
FAM 17622	13.05	0.05	79	0
FAM 18047	11.96	0.06	79	0
FAM 18048	12.04	0.04	79	0
FAM 18049	11.99	0.01	79	0
FAM 18051	11.96	0.09	79	0
FAM 18321	12.79	0.19	79.2	0
FAM 18327	12.86	0.23	79	0
FAM 18747	13.69	0.23	79	0.28
FAM 18813	15.11	0.23	79	0
FAM 18909	12.4	0.06	79	0
FAM 18965	14.08	0.07	79	0
FAM 19052	13.35	0.01	79	0
FAM 19132	13.98	0.01	79	0
FAM 19144	13.16	0.13	79	0
FAM 19161	15.18	0.35	78.9	0.14
FAM 19164	13.14	0.03	78.75	0.07
FAM 19167	14.62	0.04	78.9	0.14
FAM 19169	13.07	0.04	79	0
FAM 20650	13.47	0.07	78.9	0.14
FAM 22491	12.52	0.06	78.75	0.35
DSM 20280	12.01	0.03	79	0
NTC	35	0	0	0
Dynamic range and efficiency
Strain	Cq	STD	Tm	STD		R=	0.99843
DSM 20336 1e+06 copies	11.8	0.03	78.83	0.15		R^2=	0.99687
DSM 20336 1e+05 copies	15.81	0.04	78.73	0.06		M=	-3.523
DSM 20336 1e+04 copies	19.17	0.15	78.67	0.15		B=	33.211
DSM 20336 1e+03 copies	22.73	0.05	78.6	0.17		Efficiency	0.92
DSM 20336 1e+02 copies	26.35	0.14	78.5	0
DSM 20336 1e+01 copies	29.42	0.78	78.7	0
NTC	35	0	0	0
Exclusivity
Strain	Cq	STD	Tm	STD			Strain	Cq	STD	Tm	STD			Strain	Cq	STD	Tm	STD
ATCC 19435	35	0	0	0			DSM 20241	35	0	0	0			NCIMB 702745	26.59	0.06	83.3	0
FAM 17950	35	0	0	0			DSM 20284	35	0	0	0			NCIMB 702663	28.81	0.61	1) 83.3	-
FAM 23201	35	0	0	0			FAM 13881	35	0	0	0			DSM 20057	35	0	0	0
DSM 20069	35	0	0	0			FAM 19158	35	0	0	0			LMG 11439	35	0	0	0
FAM 17873	35	0	0	0			ATCC 19433	35	0	0	0			LMG 11985	35	0	0	0
FAM 23216	35	0	0	0			FAM 22123	35	0	0	0			DSM 20584	35	0	0	0
DSM 5707	35	0	0	0			DSM 20376	35	0	0	0			DSM 20356	35	0	0	0
FAM 21731	35	0	0	0			DSM 20477	35	0	0	0			NCIMB 4504	35	0	0	0
FAM 21823	35	0	0	0			FAM 1711	35	0	0	0			DSM 10532	35	0	0	0
DSM 20617	35	0	0	0			FAM 19316	35	0	0	0			LMG 14751	35	0	0	0
FAM 10792	35	0	0	0			DSM 20271	35	0	0	0			LMG 14754	35	0	0	0
FAM 21476	35	0	0	0			FAM 15217.1	35	0	0	0			DSM 19284	34.49	0.72	0	0
DSM 5622	35	0	0	0			FAM 15346	35	0	0	0			DSM 20719	35	0	0	0
FAM 18133.2	35	0	0	0			DSM 2637	35	0	0	0			DSM 20587	34.57	0.61	0	0
FAM 19331	35	0	0	0			FAM 1550	35	0	0	0			DSM 27983	35	0	0	0
DSM 20021	31.65	0.17	0	0			FAM 22550	35	0	0	0			DSM 20178	23.05	0.01	85.7	0
FAM 19984	35	0	0	0			ATCC 393	27.59	0.08	78.95	0.35			DSM 20314	35	0	0	0
FAM 22674	35	0	0	0			FAM 20446	23.73	0.04	84.9	0.14			FAM 6023	35	0	0	0
DSM 20075	35	0	0	0			DSM 20017	35	0	0	0			FAM 20647	29.09	0.27	0	0
FAM 13019	35	0	0	0			DSM 15831	30.3	1.36	0	0			DSM 20684	29.5	0.31	0	0
FAM 19190	35	0	0	0			FAM 14960	35	0	0	0			FAM 2884	35	0	0	0
DSM 20052	35	0	0	0			DSM 20004	35	0	0	0			FAM 18362	35	0	0	0
FAM 11660	35	0	0	0			DSM 20001	35	0	0	0			FAM 21999	35	0	0	0
DSM 20174	35	0	0	0			FAM 20761	35	0	0	0			DSM 5576	35	0	0	0
ATCC 8014	35	0	0	0			DSM 791	35	0	0	0			DSM 20202	35	0	0	0
FAM 18858	35	0	0	0			FAM 1318	35	0	0	0			DSM 20192	35	0	0	0
DSM 10667	35	0	0	0			FAM 1351	35	0	0	0			FAM 22486	35	0	0	0
DSM 10641	35	0	0	0			DSM 10702	35	0	0	0			DSM 20193	34.65	0.49	0	0
FAM 18197	35	0	0	0			FAM 19008	35	0	0	0			FAM 23926	35	0	0	0
DSM 20019	35	0	0	0			FAM 19012	35	0	0	0			FAM 23927	35	0	0	0
FAM 18731	35	0	0	0			DSM 13528	35	0	0	0			DSM 18001	35	0	0	0
FAM 18867	35	0	0	0			DSM 795	34.73	0.37	0	0			FAM 18814	35	0	0	0
DSM 20054	29.48	0.06	0	0			FAM 22878	35	0	0	0			DSM 4900	35	0	0	0
CCUG 33268	25.51	0.12	78.35	0.49			FAM 1748	35	0	0	0			DSM 20272	35	0	0	0
CCUG 48612	26.83	0.2	83.8	0			DSM 20633	35	0	0	0			DSM 20273	35	0	0	0
DSM 20072	32.83	1.03	0	0			FAM 19822	35	0	0	0			DSM 20560	33.42	2.23	0	0
DSM 20074	29.34	0.11	0	0			FAM 22256	35	0	0	0			FAM 22223	35	0	0	0
DSM 20081	29.75	0.71	0	0			DSM 20079	35	0	0	0			NTC	35	0	0	0
DSM 20346	35	0	0	0			FAM 22749	35	0	0	0			NTC	33.8	1.7	0	0
DSM 20484	35	0	0	0			FAM 22751	35	0	0	0			NTC	35	0	0	0
DSM 20343	35	0	0	0			DSM 20531	27.23	0.32	84.7	0			NTC	35	0	0	0
Run to run variation positive control
	DSM 20336				DSM 20333				DSM 20280
	Cq	std	Tm	std	Cq	std	Tm	std	Cq	std	Tm	std
Run 1	12.18	0.03	79.3	0	12.05	0.12	79.25	0.07	12.01	0.03	79	0
Run 2	11.88	0.08	79.4	0.14	11.72	0.04	79.25	0.07	11.77	0.13	79.4	0.14
Run 3	11.93	0.01	79.25	0.35	11.4	0.31	79.2	0	11.77	0.13	79.1	0.14
Run 4	11.82	0.01	79.25	0.07	11.65	0.13	79.35	0.21	11.72	0.13	79.1	0.14
Run 5	11.76	0	79.1	0.14	11.11	0.12	79.25	0.07	11.72	0.01	78.85	0.21
Mean	11.91	0.16	79.26	0.11	11.59	0.35	79.26	0.05	11.8	0.12	79.09	0.2
Min	11.76		79.1		11.11		79.2		11.72		78.85
Max	12.18		79.4		12.05		79.35		12.01		79.4
