# Supplementary material for: SpeciesPrimer: a bioinformatics pipeline dedicated to the design of qPCR primers for the quantification of bacterial species
Source: PeerJ journal article supplement (doi:10.7717/peerj.8544), 2020-02-18
Supplement: Supplemental_DatasetS5.pdf [file Supplemental_DatasetS5.pdf]

**Summarized results of predicted amplicon BLAST search against the RefSeq Genomes database (limited to Bacteria, taxid:2).**

Summarized alignments of web-based BLAST search with the predicted PCR product of the primer pairs as query. The first line in the alignment represent the forward primer sequence (left) and the reverse-complement sequence of the reverse primer (right). The second line represents the predicted PCR product. Only one sequence per BLAST hit for a certain species is shown if the sequences were identical, the number of these redundant hits is given in the last row of the results table.

**Ec faeca\_acuI\_1\_P0**

```

Ecfaeca_acuI_P0      1 TCATTTCAAGCATTACGTTAAGAGA-----TCAACTGAAAACC
query_acuI_1        1 TCATTTCAAGCATTACGTTAAGAGAACAAGNTACATCTGTTATTGGTCAACTGAAAACC
BLASTHIT_1          1 TCATTTCAAGCATTACGTTAAGAGAACAAGATACATCTGTTATTGGTCAACTGAAAACC
BLASTHIT_2          1 TCATTTCAAGCATTACGTTAAGAGAACAAGATACATCTGTTATTGGTCAACTGAAAACC
BLASTHIT_3          1 TCATTTCAAGCATTACGTTAAGAGAACAAGATACATCTGTTATTGGTCAACTGAAAACC
BLASTHIT_4          1 TCATTTCAAGCATTACGTTAAGAGAACAAGATACATCTGTTATTGGTCAACTGAAAACC
BLASTHIT_5          1 TCATTTCAAGCATTACGTTAAGAGAACAAGATACATCTGTTATTGGTCAACTGAAAACC
BLASTHIT_6          1 TCATTTCAAGCATTACGTTAAGAGAACA-----TCAACTGAAAACC
BLASTHIT_7          1 -----TATTGGTCAAGTTGAGACC
BLASTHIT_8          1 -----GAAGAAGATTCACCTGTTATTGGTCAAGTGAACGCC
BLASTHIT_9          1 -----GAAGAAGATTCACCTGTTATTGGTCAAGTGAACGCC
BLASTHIT_10         1 -----TGGTCAACTGAAAACC
BLASTHIT_11         1 -----TACATCTGTTATTGGTCAACTGAAAACC
BLASTHIT_12         1 -----TGGTCAACTGAAAACC
BLASTHIT_13         1 -----ACAAGGAACATCTGTTATTGGTCAACTGAAAACC
BLASTHIT_14         1 -----AAAAGACAGGTTACTTTGTTATTGGTCAACTGAAAACC
BLASTHIT_15         1 --ATTCCAAGCATTACATTGAGAAGAGAACAAGGTAC
BLASTHIT_16         1 -----TTCTTGAATCAACTGAAAACC
BLASTHIT_17         1 -----CATCTGTTATTGGTCAACTGAAAACC
BLASTHIT_18         1 -----CAAGCATTACGTTAAGAGA-----TCAACTGAAAACC
BLASTHIT_19         1 -----TACGTTAAGAGAACAAGATACA-----TCAACTGAAAACC
BLASTHIT_20         1 -----TACGTTAAGAGAACAAGATACA-----TCAACTGAAAACC
...
N=96

```

```

Ecfaeca_acuI_P0      40 ATTACTTTAGACG
query_acuI_1        61 ATTACTTTAGACG
BLASTHIT_1          61 ATTACTTTAGACG
BLASTHIT_2          61 ATTACTTTAGACG
BLASTHIT_3          61 ATTACTTTAGACG
BLASTHIT_4          61 ATTACTTTAGACG
BLASTHIT_5          61 ATTACTTTAGACG
BLASTHIT_6          1 -----
BLASTHIT_7          20 ATTACTTTAGA--
BLASTHIT_8          37 ATT-----
BLASTHIT_9          37 ATT-----
BLASTHIT_10         17 ATTACTTT-----
BLASTHIT_11         1 -----
BLASTHIT_12         18 ATTACTTTAGA--
BLASTHIT_13         1 -----
BLASTHIT_14         41 -----
BLASTHIT_15         1 -----
BLASTHIT_16         21 ATTACTTTAG-----
BLASTHIT_17         1 -----
BLASTHIT_18         1 -----
BLASTHIT_19         14 ATTACTTTAGAC--
BLASTHIT_20         1 -----
...
N=96

```

| BLAST HIT | Species                            | Query coverage [%] | Identity [%] | Accession         | redundant hits |
|-----------|------------------------------------|--------------------|--------------|-------------------|----------------|
| 1         | Enterococcus faecalis              | 100                | 99           | NC_004668.1       | 690 x          |
| 2         | Enterococcus sp.                   | 100                | 99           | NZ_JWBQ01000067.1 | 3 x            |
| 3         | Enterococcus faecalis              | 100                | 99           | NZ_JUXC01000095.1 | -              |
| 4         | Enterococcus faecalis              | 100                | 97           | NZ_PHLF01000001.1 | -              |
| 5         | Enterococcus faecalis              | 100                | 97           | NZ_KZ845811.1     | -              |
| 6         | Staphylococcus aureus              | 40                 | 100          | NZ_LJOC01000115.1 | 1 x            |
| 7         | Anaerorhabdus furcosa              | 41                 | 90           | NZ_FUWY01000002.1 | -              |
| 8         | Oceanihabitans sediminis           | 53                 | 82           | NZ_QPIG01000005.1 | 1 x            |
| 9         | Flavobacteriaceae bacterium        | 53                 | 82           | NZ_MPGM01000017.1 | -              |
| 10        | Nitrosotalea sp.                   | 33                 | 96           | NZ_FRFC01000001.1 | -              |
| 11        | Collimonas fungivorans             | 36                 | 92           | NZ_CP013232.1     | -              |
| 12        | Nostoc piscinale                   | 38                 | 89           | NZ_CP012036.1     | -              |
| 13        | Ewingella americana                | 34                 | 92           | NZ_JMPJ01000065.1 | -              |
| 14        | Neisseriaceae bacterium            | 55                 | 80           | NZ_CP024847.1     | -              |
| 15        | Clostridium kluyveri               | 46                 | 80           | NZ_CP018335.1     | -              |
| 16        | Planktothrix agardhii              | 41                 | 87           | NZ_CM002803.1     | -              |
| 17        | Hungateiclostridium cellulolyticum | 27                 | 100          | NZ_JH556653.1     | -              |
| 18        | Pseudoalteromonas atlantica        | 27                 | 100          | NC_008228.1       | -              |
| 19        | Bacillus simplex                   | 34                 | 92           | NZ_NQLS01000166.1 | 2 x            |
| 20        | Olleya namhaensis                  | 30                 | 95           | NZ_FORM01000001.1 | -              |

\* anomalous sequences excluded from alignment

- gi|1423449487|ref|NZ\_UEMU01000447.1|Escherichia coli strain KCRI-77E isolate RDK43\_77E
- gi|1005608163|ref|NZ\_FFHQ01000001.1|Listeria monocytogenes strain 2842STDY5753961
- gi|522836524|ref|NZ\_KE352150.1|Enterococcus faecalis strain SB2C-2 Scaffold11
- gi|1120478950|ref|NZ\_FQTZ01000002.1|Enterococcus faecium isolate Hp\_76-17\_S13\_

Ec\_faeca\_g3060\_1\_P0

```

Ecfaeca_g3060_P 1 CCCTCTTTAACATTAATTGGACTTGC-----AGCCAAGCCTAT
query_g3060_1 1 CCCTCTTTAACATTAATTGGACTTGCNCAGCAATTATTTATTAGTAAAGCCAAGCCTAT
BLASTHIT_1 1 CCCTCTTTAACATTAATTGGACTTGCNCAGCAATTATTTATTAGTAAAGCCAAGCCTAT
BLASTHIT_2 1 CCCTCTTTAACATTAATTGGACTTGCNCAGCAATTATTTATTAGTAAAGCCAAGCCTAT
BLASTHIT_3 1 CCCTCTTTAACATTAATTGGACTTGCNCAGCAATTATTTATTAGTAAAGCCAAGCCTAT
BLASTHIT_4 1 ---TCCTTAAACATTAATTGGACTTGCNCAGCAATTATTTATTAGTAAAGCCAAGCCTAT
BLASTHIT_5 1 -----GCAAGTATTT-TTAGTAAAGCCAAGCCTAT
BLASTHIT_6 1 -----AATTATTTATTAGTAAAGCCAAGCCTAT
BLASTHIT_7 1 -----AGTAAAGCCAAGCCTAT
BLASTHIT_8 1 -----
BLASTHIT_9 1 -----
BLASTHIT_10 1 -----
BLASTHIT_11 1 -----TTGTTTATTAGTAAAGCCAAGCCTAT
BLASTHIT_12 1 -----AGCGATTATTTTATTAGTAAAGCCAAGCCTAT
BLASTHIT_13 1 -----TATTAGTAAAGCCAAGCCTAT
BLASTHIT_14 1 -----TTACTTATTAGTAAAGCCAAGCCTAT
BLASTHIT_15 1 -----ATTAGTAAAGCCAAGCCTAT
BLASTHIT_16 1 -----TTGTTTATTAGTAAAGCCAAGCCTAT
BLASTHIT_17 1 -----AATGATTTATTAGTAAAGCCAAGCCTAT
BLASTHIT_18 1 -----ATTAGTAAAGCCAAGCCTAT
BLASTHIT_19 1 -----GGACTTGCAGCAATTATTTATTAGTAAAGCCAAGCCTAT
BLASTHIT_20 1 -----ATTATTTATTAGTAAAGCCAAGCCTAT
...
N=206

```

```

Ecfaeca_g3060_P 39 AAATTAAGAAATCA
query_g3060_1 61 AAATTAAGAAATCA
BLASTHIT_1 61 AAATTAAGAAATCA
BLASTHIT_2 61 AAATTAAGAAATCA
BLASTHIT_3 61 AAATTAAGAAATCA
BLASTHIT_4 58 AAATTAAGAAATCA
BLASTHIT_5 30 AAATTA
BLASTHIT_6 29 AAATTA
BLASTHIT_7 19 AAATTAAGAAATCA
BLASTHIT_8 -----
BLASTHIT_9 -----
BLASTHIT_10 -----
BLASTHIT_11 28 GAATTAAGAAAT
BLASTHIT_12 -----
BLASTHIT_13 23 AAATTAAGAAAT
BLASTHIT_14 28 AAATTA
BLASTHIT_15 22 AAATTA
BLASTHIT_16 28 GAATTAAGAAAT
BLASTHIT_17 -----
BLASTHIT_18 22 -----
BLASTHIT_19 40 AA
BLASTHIT_20 -----
...
N=206

```

| BLAST HIT | Species                              | Query coverage [%] | Identity [%] | Accession         | redundant hits |
|-----------|--------------------------------------|--------------------|--------------|-------------------|----------------|
| 1         | Enterococcus faecalis                | 100                | 99           | NC_004668.1       | 687 x          |
| 2         | Enterococcus sp.                     | 100                | 99           | NZ_JWBQ01000066.1 | 2 x            |
| 3         | Enterococcus faecalis                | 100                | 99           | NZ_GL454749.1     | -              |
| 4         | Enterococcus faecalis                | 96                 | 99           | NZ_PTYL01000009.1 | -              |
| 5         | Flavobacterium sp.                   | 48                 | 87           | NZ_CP031557.1     | -              |
| 6         | Buchnera aphidicola                  | 42                 | 90           | NC_004061.1       | 1 x            |
| 7         | Acinetobacter johnsonii              | 43                 | 88           | NZ_FUUY01000018.1 | -              |
| 8         | Pasteurella multocida subsp. septica | 39                 | 90           | NZ_UGSW01000001.1 | 1 x            |
| 9         | Pasteurella multocida                | 39                 | 90           | NZ_PSQH01000001.1 | 4 x            |
| 10        | Pasteurella multocida                | 39                 | 90           | NZ_CP023972.1     | -              |
| 11        | Enterococcus thailandicus            | 53                 | 82           | NZ_LWMN01000016.1 | 2 x            |
| 12        | Algoriphagus halophilus              | 39                 | 90           | NZ_FSRC01000001.1 | -              |
| 13        | Candidatus Borrelia                  | 41                 | 89           | NZ_CP025785.1     | -              |
| 14        | Elizabethkingia ursingii             | 43                 | 89           | NZ_MBDS01000002.1 | -              |
| 15        | Clostridiales bacterium              | 32                 | 96           | NZ_JQKL01000001.1 | -              |
| 16        | Enterococcus sp.                     | 53                 | 82           | NZ_NGMR01000001.1 | -              |
| 17        | Flavobacterium beibuense             | 35                 | 92           | NZ_JRLV01000001.1 | -              |
| 18        | Aliterella atlantica                 | 28                 | 100          | NZ_JYON01000010.1 | -              |
| 19        | Herpetosiphon geysericola            | 56                 | 79           | NZ_LGKP01000017.1 | -              |
| 20        | Corynebacterium kutscheri            | 28                 | 100          | NZ_CP011312.1     | -              |

\* anomalous sequences excluded from alignment  
 gi|1005608163|ref|NZ\_FFHQ01000001.1|Listeria monocytogenes strain 2842STDY5753961  
 gi|522836690|ref|NZ\_KE352316.1|Enterococcus faecalis strain SB2C-2 Scaffold89  
 gi|1120479204|ref|NZ\_FQZT01000012.1|Enterococcus faecium isolate Hp\_76-17\_S13  
 gi|1129541613|ref|NZ\_CWML01000029.1|Listeria monocytogenes isolate LM52

Ec\_faeci\_cysS\_3\_P1

```

Ecfaeci_cysS_P1 1 GCAGCCACCAATTTACAACGA-----
query_cysS_3 1 GCAGCCACCAATTTACAACGANTGAAGAATACGTTTGACAATTTGAAATTCGGCCAAGAA
BLASTHIT_1 1 GCAGCCACCAATTTACAACGACTGAAGAATACGTTTGACAATTTGAAATTCGGCCAAGAA
BLASTHIT_2 1 GCAGCCACCAATTTACAACGACTGAAGAATACGTTTGACAATTTGAAATTCGGCCAAGAA
BLASTHIT_3 1 GCAGCCACCAATTTACAACGACTGAAGAATACGTTTGACAATTTGAAATTCGGCCAAGAA
BLASTHIT_4 1 GCAGCCACCAATTTACAACGACTGAAGAATACGTTTGACAATTTGAAATTCGGCCAAGAA
BLASTHIT_5 1 GCAGCCACCAATTTACAACGACTGAAGAATACGTTTGACAATTTGAAATTCGGCCAAGAA
BLASTHIT_6 1 GCAGCCACCAATTTACAACGACTGAAGAATACGTTTGACAATTTGAAATTCGGCCAAGAA
BLASTHIT_7 1 GCAGCCACCAATTTACAACGACTGAAGAATACGTTTGACAATTTGAAATTCGGCCAAGAA
BLASTHIT_8 1 GCAGCCACCAATTTACAACGACTGAAGAATACGTTTGACAATTTGAAATTCGGCCAAGAA
BLASTHIT_9 1 GCAGCCACCAATTTACAACGACTGAAGAATACGTTTGACAATTTGAAATTCGGCCAAGAA
BLASTHIT_10 1 GCAGCCACCAATTTACAACGACTGAAGAATACGTTTGACAATTTGAAATTCGGCCAAGAA
BLASTHIT_11 1 GCAGCCACCAATTTACAACGACTGAAGAATACGTTTGACAATTTGAAATTCGGCCAAGAA
BLASTHIT_12 1 GCAGCCACCAATTTACAACGACTGAAGAATACGTTTGACAATTTGAAATTCGGCCAAGAA
BLASTHIT_13 1 GCAGCCACCAATTTACAACGACTGAAGAATACGTTTGACAATTTGAAATTCGGCCAAGAA
BLASTHIT_14 1 GCAGCCACCAATTTACAACGACTGAAGAATACGTTTGACAATTTGAAATTCGGCCAAGAA
BLASTHIT_15 1 GCAGCCACCAATTTACAACGACTGAAGAATACGTTTGACAATTTGAAATTCGGCCAAGAA
BLASTHIT_16 1 GCAGCCACCAATTTACAACGACTGAAGAATACGTTTGACAATTTGAAATTCGGCCAAGAA
BLASTHIT_17 1 -----CCAATTTCAACGTTTGAAGAATACG-----AAGAA
BLASTHIT_18 1 -----TGAAGAATACGTTTGACAATTTCAAATTC-----A
BLASTHIT_19 1 -----
BLASTHIT_20 1 -----
...
...
N=44

```

```

Ecfaeci_cysS_P1 22 ----CCTCAGAGAATTTGGCAGATGA
query_cysS_3 61 ACTGCCTCAGAGAATTTGGCAGATGA
BLASTHIT_1 61 ACTGCCTCAGAGAATTTGGCAGATGA
BLASTHIT_2 61 ACTGCCTCAGAGAATTTGGCAGATGA
BLASTHIT_3 61 ACTGCCTCAGAGAATTTGGCAGATGA
BLASTHIT_4 61 ACTGCCTCAGAGAATTTGGCAGATGA
BLASTHIT_5 61 ACTGCCTCAGAGAATTTGGCAGATGA
BLASTHIT_6 61 ACTGCCTCAGAGAATTTGGCAGATGA
BLASTHIT_7 61 ACTGCCTCAGAGAATTTGGCAGATGA
BLASTHIT_8 61 ATTGCCTCAGAGAATTTGGCAGATGA
BLASTHIT_9 61 ACTGCCTCAGAGAATTTGGCAGATGA
BLASTHIT_10 -----
BLASTHIT_11 -----
BLASTHIT_12 -----
BLASTHIT_13 -----
BLASTHIT_14 -----
BLASTHIT_15 -----
BLASTHIT_16 -----
BLASTHIT_17 -----
BLASTHIT_18 6 ACTGCCTCAGAGAATTTGGCAGATGA
BLASTHIT_19 2 ACTGCCTCAGAGAATTTGGCAGATGA
...
...
N=44

```

| BLAST HIT | Species                   | Query coverage [%] | Identity [%] | Accession         | redundant hits |
|-----------|---------------------------|--------------------|--------------|-------------------|----------------|
| 1         | Enterococcus faecium      | 100                | 98           | NC_017960.1       | 1051 x         |
| 2         | Enterococcus sp.          | 100                | 98           | NZ_AJRB03000003.1 | 37 x           |
| 3         | Enterococcus faecium      | 100                | 98           | NZ_PTV01000111.1  | -              |
| 4         | Enterococcus faecium      | 100                | 98           | NZ_KB029683.1     | -              |
| 5         | Enterococcus sp.          | 100                | 97           | NZ_KV829502.1     | -              |
| 6         | Enterococcus faecium      | 100                | 97           | NZ_PUAH01000015.1 | -              |
| 7         | Enterococcus faecium      | 100                | 97           | NZ_PUBG01000061.1 | -              |
| 8         | Enterococcus faecium      | 100                | 97           | NZ_PTTS01000223.1 | -              |
| 9         | Enterococcus faecium      | 100                | 97           | NZ_MJDZ01000007.1 | -              |
| 10        | Enterococcus mundtii      | 62                 | 83           | NZ_PTUS01000014.1 | 17 x           |
| 11        | Enterococcus mundtii      | 62                 | 83           | NZ_PYGS01000082.1 | -              |
| 12        | Enterococcus mundtii      | 62                 | 81           | NC_022878.1       | -              |
| 13        | Enterococcus mundtii      | 62                 | 81           | NZ_AFWZ01000346.1 | -              |
| 14        | Enterococcus pernyi       | 62                 | 81           | NZ_KV388085.1     | -              |
| 15        | Enterococcus ratti        | 62                 | 79           | NZ_JXLB01000002.1 | -              |
| 16        | Enterococcus villorum     | 62                 | 77           | NZ_MJEB01000016.1 | 1 x            |
| 17        | Bacillus okhensis         | 30                 | 92           | NZ_JRJU01000050.1 | -              |
| 18        | Anaplasma phagocytophilum | 28                 | 96           | NZ_LANV01000001.1 | 17 x           |
| 19        | Chitinophaga terrae       | 34                 | 89           | NZ_FNRL01000002.1 | -              |
| 20        | Amycolatopsis sacchari    | 24                 | 100          | NZ_FORP01000012.1 | -              |

Ec\_faeci\_purD\_2\_P0

```

Ecfaeci_purD_P0 1 GGAATGAAAGAAGCTAGGACGCT-----ATTGCTACG
query_purD_2 1 GGAATGAAAGAAGCTAGGACGCTCTTTCACGGGTGTTTTATATGCGGGTTTNAATTGCTACG
BLASTHIT_1 1 GGAATGAAAGAAGCTAGGACGCTCTTTCACGGGTGTTTTATATGCGGGTTTNAATTGCTACG
BLASTHIT_2 1 GGAATGAAAGAAGCTAGGACGCTCTTTCACGGGTGTTTTATATGCGGGTTTNAATTGCTACG
BLASTHIT_3 1 GGAATGAAAGAAGCTAGGACGCTCTTTCACGGGTGTTTTATATGCGGGTTTNAATTGCTACG
BLASTHIT_4 1 GGAATGAAAGAAGCTAGGACGCTCTTTCACGGGTGTTTTATATGCGGGTTTNAATTGCTACG
BLASTHIT_5 1 GGAATGAAAGAAGCTAGGACGCTCTTTCACGGGTGTTTTATATGCGGGTTTNAATTGCTACG
BLASTHIT_6 1 -----GGGCGCTCTTTCACGGGTGTTTTATATGCGGGTTTNAATTGCTACG
BLASTHIT_7 1 GGAATGAAAGAACTAGGACGCTCCGTTTACTGGTATTTTATATGCGGGTTTNAATTGCTACG
BLASTHIT_8 1 GGAATGAAAGAACTAGGACGCTCCATTACTGGTATTTTATATGCGGGTTTNAATTGCTACG
BLASTHIT_9 1 GGAATGAAAGAAGCTAGGACGCTCCATTACTGGTATTTTATATGCGGGTTTNAATTGCTACG
BLASTHIT_10 1 -----GGGCGCTCTTTCACGGGTGTTTTATATGCGGGTTTNAATTGCTACG
BLASTHIT_11 1 -----GGGCGCTCTTTCACGGGTGTTTTATATGCGGGTTTNAATTGCTACG
BLASTHIT_12 1 -----GGGCGCTCTTTCACGGGTGTTTTATATGCGGGTTTNAATTGCTACG
BLASTHIT_13 1 GGAATGAAAGAAGCTAGGACGCTCCATTACTGGTATTTTATATGCGGGTTTNAATTGCTACG
BLASTHIT_14 1 GGAATGAAAGAAGCTAGGACGCTCCATTACTGGTATTTTATATGCGGGTTTNAATTGCTACG
BLASTHIT_15 1 -----AGGTGCTTTCGTTTACTGGTATTTTATATGCGGGTTTNAATTGCTACG
BLASTHIT_16 1 GGAATGAAAGAACTAGGACGCTCCGTTTACTGGTATTTTATATGCGGGTTTNAATTGCTACG
BLASTHIT_17 1 -----ATGGAAGAAGAGGCGCATCCTTCACTGGAGTTTTATATGCGGGTTTNAATTGCTACG
BLASTHIT_18 1 GGAATGAAAGAAGCTAGGACGCTCCATTACTGGTATTTTATATGCGGGTTTNAATTGCTACG
BLASTHIT_19 1 GGAATGAAAGAAGCTAGGACGCTCCATTACTGGTATTTTATATGCGGGTTTNAATTGCTACG
BLASTHIT_20 1 -----AATGGAAGAAGAGGCGCTCTTTCACGGGTGTTTTATATGCGGGTTTNAATTGCTACG
...
N=67

```

```

Ecfaeci_purD_P0 32 AAGGAAGGACC-
query_purD_2 61 AAGGAAGGACC-
BLASTHIT_1 61 AAGGAAGGACC-
BLASTHIT_2 61 AAGGAAGGACC-
BLASTHIT_3 61 AAGGAAGGACC-
BLASTHIT_4 61 AAGGAAGGACC-
BLASTHIT_5 61 AAGGAAGGACC-
BLASTHIT_6 46 AATTAAGGA-
BLASTHIT_7 61 GCAGGAAGGACC-
BLASTHIT_8 61 GCAGGAAGGACC-
BLASTHIT_9 61 GCAGGAAGGACC-
BLASTHIT_10 46 AATTAAGGA-
BLASTHIT_11 46 AATTAAGGA-
BLASTHIT_12 46 AA-----
BLASTHIT_13 -----
BLASTHIT_14 61 GCAGGAAGGACC-
BLASTHIT_15 47 AA-----
BLASTHIT_16 60 AGTTGAAAGGACC-
BLASTHIT_17 57 GAAAGAAAGGACC-
BLASTHIT_18 -----
BLASTHIT_19 -----
BLASTHIT_20 59 AAGGAAGGACC-
...
N=67

```

| BLAST HIT | Species                       | Query coverage [%] | Identity [%] | Accession         | redundant hits |
|-----------|-------------------------------|--------------------|--------------|-------------------|----------------|
| 1         | Enterococcus faecium          | 100                | 99           | NC_017960.1       | 1080 x         |
| 2         | Enterococcus sp.              | 100                | 99           | NZ_AJRB03000044.1 | 37 x           |
| 3         | Enterococcus sp.              | 100                | 99           | NZ_NGMF01000001.1 | -              |
| 4         | Enterococcus faecium          | 100                | 99           | NZ_JH804745.1     | -              |
| 5         | Enterococcus faecium          | 100                | 97           | NZ_JWEB01000121.1 | -              |
| 6         | Bacillus cihuenis             | 75                 | 87           | NZ_AYSD01000010.1 | -              |
| 7         | Enterococcus mundtii          | 100                | 79           | NZ_PYGS01000033.1 | 5 x            |
| 8         | Enterococcus mundtii          | 100                | 79           | NZ_FOUC01000005.1 | -              |
| 9         | Enterococcus mundtii          | 100                | 79           | NZ_NGMS01000001.1 | -              |
| 10        | Paenibacillus sp.             | 76                 | 83           | NZ_LMVB01000002.1 | -              |
| 11        | Bacillus sp.                  | 76                 | 83           | NZ_LMXG01000002.1 | -              |
| 12        | Bacillus loiseleuriae         | 66                 | 85           | NZ_LFWZ01000001.1 | -              |
| 13        | Enterococcus pernyi           | 83                 | 80           | NZ_KV388085.1     | -              |
| 14        | Enterococcus mundtii          | 100                | 76           | NZ_PTUS01000023.1 | -              |
| 15        | Enterococcus faecalis         | 68                 | 83           | NZ_KE351686.1     | -              |
| 16        | Enterococcus gallinarum       | 99                 | 76           | NZ_BCQE01000018.1 | 9 x            |
| 17        | Ureibacillus thermosphaericus | 95                 | 76           | NZ_AJIK01000018.1 | 1 x            |
| 18        | Enterococcus mundtii          | 83                 | 78           | NZ_AFWZ01000136.1 | -              |
| 19        | Enterococcus mundtii          | 83                 | 78           | NZ_PYGU01000006.1 | -              |
| 20        | Lysinibacillus sp.            | 97                 | 75           | NZ_LT985980.1     | -              |

\* anomalous sequences excluded from alignment  
 gi|1129541523|ref|NZ\_CWML01000013.1|Listeria monocytogenes isolate LM52

Pd\_acidi\_asnS\_2\_P0

```

Pdacidi_asnS_P0 1  GCCATCCACGAATTCCTCCA-----ACT
query_asnS_2 1  GCCATCCACGAATTCCTCCA-----ACT
BLASTHIT_1 1  GCCATCCACGAATTCCTCCA-----ACT
BLASTHIT_2 1  GCCATCCACGAATTCCTCCA-----ACT
BLASTHIT_3 1  GCCATCCACGAATTCCTCCA-----ACT
BLASTHIT_4 1  -----CAGGAATTCCTCAACACAATGACTTTGTTACGTTAACACCCCAATCATCACA
BLASTHIT_5 1  -----AATTCCTCAACACAATGACTTTGTTACGTTAACACCCCAATCATCACA
BLASTHIT_6 1  -----AATTCCTCAACACAATGACTTTGTTACGTTAACACCCCAATCATCACA
BLASTHIT_7 1  -----AATTCCTCAACACAATGACTTTGTTACGTTAACACCCCAATCATCACA
BLASTHIT_8 1  -----AATTCCTCAACACAATGACTTTGTTACGTTAACACCCCAATCATCACA
BLASTHIT_9 1  -----CAGGAATTCCTCAACACAATGACTTTGTTACGTTAACACCCCAATCATCACA
BLASTHIT_10 1  -----CAGGAATTCCTCAACACAATGACTTTGTTACGTTAACACCCCAATCATCACA
BLASTHIT_11 1  -----CAGGAATTCCTCAACACAATGACTTTGTTACGTTAACACCCCAATCATCACA
BLASTHIT_12 1  -----CAGGAATTCCTCAACACAATGACTTTGTTACGTTAACACCCCAATCATCACA
BLASTHIT_13 1  -----CAGGAATTCCTCAACACAATGACTTTGTTACGTTAACACCCCAATCATCACA
BLASTHIT_14 1  -----CAGGAATTCCTCAACACAATGACTTTGTTACGTTAACACCCCAATCATCACA
BLASTHIT_15 1  -----CAGGAATTCCTCAACACAATGACTTTGTTACGTTAACACCCCAATCATCACA
BLASTHIT_16 1  -----CAGGAATTCCTCAACACAATGACTTTGTTACGTTAACACCCCAATCATCACA
BLASTHIT_17 1  -----CAGGAATTCCTCAACACAATGACTTTGTTACGTTAACACCCCAATCATCACA
BLASTHIT_18 1  -----CAGGAATTCCTCAACACAATGACTTTGTTACGTTAACACCCCAATCATCACA
BLASTHIT_19 1  -----CAGGAATTCCTCAACACAATGACTTTGTTACGTTAACACCCCAATCATCACA
BLASTHIT_20 1  -----CAGGAATTCCTCAACACAATGACTTTGTTACGTTAACACCCCAATCATCACA
...
...
N=128

```

```

Pdacidi_asnS_P0 24 TCTAGTGATACGGAAGGTGC
query_asnS_2 61 TCTAGTGATACGGAAGGTGC
BLASTHIT_1 61 TCTAGTGATACGGAAGGTGC
BLASTHIT_2 61 TCTAGTGATACGGAAGGTGC
BLASTHIT_3 61 TCTAGTGATACGGAAGGTGC
BLASTHIT_4 55 AGTACTGATACGAAGGTGC
BLASTHIT_5 51 AGCAGTGATACGAAGGTGC
BLASTHIT_6 51 AGCAGTGATACGAAGGTGC
BLASTHIT_7 51 AGCAGTGATACGAAGGTGC
BLASTHIT_8 51 AGCAGTGATACGAAGGTGC
BLASTHIT_9 55 AGTACTGATACGAAGGTGC
BLASTHIT_10 55 AGTACTGATACGAAGGTGC
BLASTHIT_11 55 AGTACTGATACGAAGGTGC
BLASTHIT_12 55 AGTACTGATACGAAGGTGC
BLASTHIT_13 61 GGAAGTGATACGAAGGTGC
BLASTHIT_14 61 GGAAGTGATACGAAGGTGC
BLASTHIT_15 61 GGAAGTGATACGAAGGTGC
BLASTHIT_16 55 AGTACTGATACGAAGGTGC
BLASTHIT_17 61 GGAAGTGATACGAAGGTGC
BLASTHIT_18 55 AGTACTGATACGAAGGTGC
BLASTHIT_19 55 AGTACTGATACGAAGGTGC
BLASTHIT_20 55 AGTACTGATACGAAGGTGC
...
...
N=128

```

| BLAST HIT | Species                                           | Query coverage [%] | Identity [%] | Accession          | redundant hits |
|-----------|---------------------------------------------------|--------------------|--------------|--------------------|----------------|
| 1         | Pediococcus acidilactici                          | 100.0              | 98.0         | NZ_CP015206.1      | 16 x           |
| 2         | Pediococcus acidilactici                          | 100.0              | 98.0         | NZ_QYRQ01000020.1  | -              |
| 3         | Pediococcus acidilactici                          | 100.0              | 98.0         | NZ_JQCC01000002.1  | -              |
| 4         | Lactobacillus kunkeei                             | 92.0               | 78.0         | NZ_CP012920.1      | 11 x           |
| 5         | Pediococcus pentosaceus                           | 88.0               | 79.0         | NC_008525.1        | 11 x           |
| 6         | Pediococcus pentosaceus                           | 88.0               | 79.0         | NZ_JD VW01000006.1 | -              |
| 7         | Pediococcus pentosaceus                           | 88.0               | 79.0         | NZ_JQBF01000008.1  | -              |
| 8         | Pediococcus pentosaceus                           | 88.0               | 79.0         | NC_022780.1        | -              |
| 9         | Lactobacillus kunkeei                             | 92.0               | 77.0         | NZ_JXCZ01000012.1  | -              |
| 10        | Lactobacillus kunkeei                             | 92.0               | 77.0         | NZ_JXDA01000004.1  | -              |
| 11        | Lactobacillus kunkeei                             | 92.0               | 77.0         | NZ_BDDX01000015.1  | -              |
| 12        | Lactobacillus kunkeei                             | 92.0               | 77.0         | NZ_JXDD01000007.1  | -              |
| 13        | Ruminiclostridium cellobioparum subsp. termitidis | 100.0              | 74.0         | NZ_AORV01000003.1  | -              |
| 14        | Lactobacillus sp.                                 | 100.0              | 74.0         | NZ_CP031933.1      | -              |
| 15        | Leptotrichia sp.                                  | 100.0              | 74.0         | NZ_CP016753.1      | -              |
| 16        | Lactobacillus kunkeei                             | 92.0               | 74.0         | NZ_JXDC01000005.1  | -              |
| 17        | Ruminiclostridium cellobioparum                   | 100.0              | 72.0         | NZ_JHYD01000026.1  | -              |
| 18        | Faecalibacterium prausnitzii                      | 74.0               | 76.0         | NZ_QVFB01000007.1  | 9 x            |
| 19        | Lactobacillus sp.                                 | 92.0               | 73.0         | NZ_CP032626.1      | -              |
| 20        | Faecalibacterium prausnitzii                      | 74.0               | 76.0         | NZ_NMTZ01000018.1  | -              |

Pd\_acidi\_g1164\_1\_P0

```

Pdacidi_g1164_P 1 TTTAGGAGCAATCATCGCAATC-----GGTAG
query_g1164_1 1 TTTAGGAGCAATCATCGCAATGTTTTCGGCATTATCTGGGTCACGNTGGCTTGGTAG
BLASTHIT_1 1 TTTAGGAGCAATCATCGCAATGTTTTCGGCATTATCTGGGTCACGATTGGCTTGGTAG
BLASTHIT_2 1 -----CAATCATCGCAATGTTTTGGGTTTATCTG-----
BLASTHIT_3 1 TTTAGGAGCAATCATCGCAATCTTTTCGGCATTATCTGGGTCACGATTGGCTTGGTAG
BLASTHIT_4 1 -----GCGAGGATTTCGGCATCATCTGGGGCAC-----
BLASTHIT_5 1 -----CAATCATCGCACGATTATCGGGATTATC-----
BLASTHIT_6 1 -----CAATCATCGCACGATTATCGGGATTATC-----
BLASTHIT_7 1 TTTAGGAGCAATCATCGCAATGAT-----
BLASTHIT_8 1 -----ATCATCGCAATTTTTCTGTATTTCTGGGTCACG-----
BLASTHIT_9 1 -----GCGAGGATTTCGGCATCATCTGGGGCACG-----
BLASTHIT_10 1 TTTAGGAGCAATCATCGCAATGATT-----
BLASTHIT_11 1 TTTAGGAGCAATCATCGCAATGATT-----
BLASTHIT_12 1 TTTAGGAGCAATCATCGCAATGATT-----
BLASTHIT_13 1 TTTAGGAGCAATCATCGCAATGATT-----
BLASTHIT_14 1 TTTAGGAGCAATCATCGCAATGATT-----
BLASTHIT_15 1 -----ATCATCGCACGATTATTTAGTCAATTATCTGGG-----
BLASTHIT_16 1 TTTAGGAGCAATCATCGCAATGATT-----
BLASTHIT_17 1 -----ATCGCAATGTTTTCGGCATT-----
BLASTHIT_18 1 -----GCAATCATCGCAATTTTT-----
BLASTHIT_19 1 -----TTTTCGGCATTATCTGGGTCAC-----
BLASTHIT_20 1 -----CATCGAATGATTTTTCGGCATTATCT-----
...
...
N=207

```

```

Pdacidi_g1164_P 28 CGCGGTATTAGTTGG
query_g1164_1 61 CGCGGTATTAGTTGG
BLASTHIT_1 61 CGCGGTATTAGTTGG
BLASTHIT_2 -----
BLASTHIT_3 -----
BLASTHIT_4 -----
BLASTHIT_5 -----
BLASTHIT_6 -----
BLASTHIT_7 -----
BLASTHIT_8 -----
BLASTHIT_9 -----
BLASTHIT_10 -----
BLASTHIT_11 -----
BLASTHIT_12 -----
BLASTHIT_13 -----
BLASTHIT_14 -----
BLASTHIT_15 -----
BLASTHIT_16 -----
BLASTHIT_17 -----
BLASTHIT_18 -----
BLASTHIT_19 -----
BLASTHIT_20 -----
...
...
N=207

```

| BLAST HIT | Species                           | Query coverage [%] | Identity [%] | Accession         | redundant hits |
|-----------|-----------------------------------|--------------------|--------------|-------------------|----------------|
| 1         | <i>Pediococcus acidilactici</i>   | 100.0              | 97.0         | NZ_CP015206.1     | 22 x           |
| 2         | <i>Helicobacter</i> sp.           | 41.0               | 90.0         | NZ_MLAM01000013.1 | -              |
| 3         | <i>Gallibacterium</i> genomosp.   | 47.0               | 86.0         | NZ_JTJS01000032.1 | -              |
| 4         | <i>Erwinia iniecta</i>            | 39.0               | 90.0         | NZ_JRXE01000016.1 | 1 x            |
| 5         | <i>Yersinia kristensenii</i>      | 39.0               | 90.0         | NZ_CWJK01000005.1 | 4 x            |
| 6         | <i>Yersinia frederiksenii</i>     | 39.0               | 90.0         | NZ_CP009364.1     | 1 x            |
| 7         | <i>Bacillus vietnamensis</i>      | 32.0               | 96.0         | NZ_LIXZ01000003.1 | -              |
| 8         | <i>Catelicoccus marimammalium</i> | 48.0               | 83.0         | NZ_AMYT01000022.1 | -              |
| 9         | <i>Erwinia persicina</i>          | 41.0               | 87.0         | NZ_BCTN01000009.1 | 1 x            |
| 10        | <i>Megamonas rupellensis</i>      | 35.0               | 92.0         | NZ_KB899597.1     | 3 x            |
| 11        | <i>Acinetobacter kyonggiensis</i> | 35.0               | 92.0         | NZ_FNPK01000003.1 | -              |
| 12        | <i>Megamonas</i> sp.              | 35.0               | 92.0         | NZ_FOCY01000013.1 | -              |
| 13        | <i>Macrocococcus epidermidis</i>  | 36.0               | 92.0         | NZ_PZJH01000003.1 | -              |
| 14        | <i>Macrocococcus goetzii</i>      | 36.0               | 92.0         | NZ_MJBI02000002.1 | -              |
| 15        | <i>Sphingobacterium faecium</i>   | 41.0               | 87.0         | NZ_QBKH01000003.1 | -              |
| 16        | <i>Acinetobacter</i> sp.          | 35.0               | 92.0         | NZ_NEGM01000001.1 | 1 x            |
| 17        | <i>Bacillus</i> sp.               | 28.0               | 100.0        | NZ_LMTJ01000002.1 | 9 x            |
| 18        | <i>Pseudomonas batumici</i>       | 28.0               | 100.0        | NZ_XJDG01000015.1 | -              |
| 19        | <i>Rhodovulum</i> sp.             | 28.0               | 100.0        | NZ_QPLK01000071.1 | -              |
| 20        | <i>Roseovarius</i> sp.            | 35.0               | 92.0         | NZ_OUMZ01000007.1 | -              |

\* anomalous sequences excluded from alignment  
 gj|522836680|ref|NZ\_KE352306.1|Enterococcus faecalis strain SB2C-2 Scaffold825

Pd\_pento\_nagK\_1\_P0

```

Fdpento_nagK_P0      1 GGGTGTCACTAACGGAGCAA-----
query_nagK_1         1 GGGTGTCACTAACGGAGCAAACNATCGCCCTTGATGATGGTGAAGTTCTGGCTTAGTTTT
BLASTHIT_1           1 GGGTGTCACTAACGGAGCAAACCATCGCCCTTGATGATGGTGAAGTTCTGGCTTAGTTTT
BLASTHIT_2           1 -----GGCGTAAGTTCAGGAATTGTTTT
BLASTHIT_3           1 -----TCTCGCTTAGTTTT
BLASTHIT_4           1 -----AAGTTATGGCTTAGTTTT
BLASTHIT_5           1 -----
BLASTHIT_6           1 -----TTCTTGTTTACTTTTT
BLASTHIT_7           1 -----TTATTTTT
BLASTHIT_8           1 -----TTCTTGTTTACTTTTT
BLASTHIT_9           1 -----ATCTCCCTCGATGATGGTGAAGTTTGGGCTT
BLASTHIT_10          1 -----ATCGCCCTTGATTATGATTTAAGTTATGG--AGTTTT
BLASTHIT_11          1 -----TTCTGGCTTAGTTTT
BLASTHIT_12          1 -----ATCGCCCTTGATTATGATTTAAGTTATGG--AGTTTT
BLASTHIT_13          1 -----CTGGCTTAGTTTT
BLASTHIT_14          1 -----CTGGCTTAGTTTT
BLASTHIT_15          1 -----
BLASTHIT_16          1 -----CTGGTTAGTTAT
BLASTHIT_17          1 -----TGATGATGGTGAATTTCTGGATT-GTCTT
BLASTHIT_18          1 -----TTAGTTTT
BLASTHIT_19          1 -----TTAT
BLASTHIT_20          1 -----TGATGATGTTGTAGTTCCTGGCTTAG
...
...
N=114

```

```

Fdpento_nagK_P0      21 -----CTTACAAGCGGGCGGAATTG
query_nagK_1         61 AAATCACCAGATTTTTCTGGTCCCACTTACAAGCGGGCGGAATTG
BLASTHIT_1           61 AAATCACCAGATTTTTCTGGTCCCACTTACAAGCGGGCGGAATTG
BLASTHIT_2           24 AAACAACAAAATCTTATCAGGCTCTCACTTACAAGCGGGCGGAATTG
BLASTHIT_3           15 AAATAGCCCGATTTTTTCT
BLASTHIT_4           19 AAATAA--AGATTTTT
BLASTHIT_5           1 -----CAGATTTTTTGGTCCCACTTACAAGCGGGCGGAATTG
BLASTHIT_6           16 AAATCACCAGATTTATT
BLASTHIT_7           9 AAATCATCAGATTTTTCT
BLASTHIT_8           16 AAATCACCAGATTTATT
BLASTHIT_9           -----
BLASTHIT_10          36 AA-----
BLASTHIT_11          16 CAATAACTCCAGATTTTTT
BLASTHIT_12          36 AA-----
BLASTHIT_13          14 AAATCACCAGA-----
BLASTHIT_14          14 AAATCACCAGA-----
BLASTHIT_15          1 -----TTTTTCTGGTCCCACTTACAAGCGGGCGGAATTG
BLASTHIT_16          14 TAACAACAAAATTTTTCTGGTT
BLASTHIT_17          30 AAA-----
BLASTHIT_18          9 ATTAATTACCAGATTTTTCTGACTTCGACTT
BLASTHIT_19          5 AAATCACCAGATTTTTCTGTTGCCA-----
BLASTHIT_20          -----
...
...
N=114

```

| BLAST HIT | Species                               | Query coverage [%] | Identity [%] | Accession         | redundant hits |
|-----------|---------------------------------------|--------------------|--------------|-------------------|----------------|
| 1         | <i>Pediococcus pentosaceus</i>        | 100.0              | 99.0         | NC_008525.1       | 14 x           |
| 2         | <i>Pediococcus stilesii</i>           | 65.0               | 74.0         | NZ_JQBX01000011.1 | -              |
| 3         | <i>Zhouia amylolytica</i>             | 31.0               | 88.0         | NZ_FPAG01000004.1 | -              |
| 4         | <i>Clostridium perfringens</i>        | 30.0               | 86.0         | NZ_CYYX01000001.1 | 4 x            |
| 5         | <i>Flavobacterium haoranii</i>        | 25.0               | 93.0         | NZ_FQZH01000005.1 | -              |
| 6         | <i>Acinetobacter bereziniae</i>       | 30.0               | 88.0         | NZ_QWV01000007.1  | 3 x            |
| 7         | <i>Mycoplasma auris</i>               | 25.0               | 93.0         | NZ_QKUB01000015.1 | -              |
| 8         | <i>Acinetobacter</i> sp.              | 30.0               | 88.0         | NZ_AMFQ01000033.1 | 4 x            |
| 9         | <i>Thiomonas intermedia</i>           | 30.0               | 88.0         | NC_014153.1       | -              |
| 10        | <i>Leptospira meyeri</i>              | 34.0               | 80.0         | NZ_AKXE01000002.1 | 1 x            |
| 11        | <i>Chryseobacterium scophthalmum</i>  | 30.0               | 83.0         | NZ_FSRQ01000001.1 | -              |
| 12        | <i>Leptospira</i> sp.                 | 34.0               | 80.0         | NZ_NPEB01000007.1 | 2 x            |
| 13        | <i>Acinetobacter brisouii</i>         | 22.0               | 96.0         | NZ_JZRE01000019.1 | -              |
| 14        | <i>Acinetobacter</i> sp.              | 22.0               | 96.0         | NZ_KB851219.1     | -              |
| 15        | <i>Clostridium pasteurianum</i>       | 24.0               | 92.0         | NC_021182.1       | -              |
| 16        | <i>Mycoplasma pullorum</i>            | 34.0               | 83.0         | NZ_CP017813.1     | 1 x            |
| 17        | <i>Lutibacter profundus</i>           | 30.0               | 87.0         | NZ_CP013355.1     | -              |
| 18        | ' <i>Nostoc azollae</i> '             | 35.0               | 80.0         | NC_014248.1       | -              |
| 19        | <i>Elizabethkingia meningoseptica</i> | 29.0               | 87.0         | NZ_BARD01000013.1 | 19 x           |
| 20        | <i>Sporomusa silvacetica</i>          | 24.0               | 92.0         | NZ_LSLK01000054.1 | -              |

Pd\_pento\_g4364\_1\_P0

```

Fdpento_g4364_P 1 TGCTTACCACCAACCTGCTT-----ACGG
query_g4364_1 1 TGCTTACCACCAACCTGCTTATAACCAAGCTNGTCAAAAGATAACGGTTAAATTTAACGG
BLASTHIT_1 1 TGCTTACCACCAACCTGCTTATAACCAAGCTAGTCAAAAGATAACGGTTAAATTTAACGG
BLASTHIT_2 1 TGCTTACCACCAACCTGCTTATAACCAAGCTGGTCAAAAGATAACGGTTAAATTTAACGG
BLASTHIT_3 1 -----AAAAAGATAACGGTTAAATTTAAC
BLASTHIT_4 1 -----CAGCAACCRGCTCATAACCAAGCT-----
BLASTHIT_5 1 TGCTTGTGACCAACCTGCTTATAACCAAG-----
BLASTHIT_6 1 -----CAACCCTGCTCATAACCAAGCTCGTCA-----
BLASTHIT_7 1 -----GTCTGAAAAGAA--ACGGTTAAATTTAACGG
BLASTHIT_8 1 -----GTTAAATCTAACGG
BLASTHIT_9 1 -----AAGATGGTCAAAAGATAACGGTTAA-----
BLASTHIT_10 1 -----AACGGTTAAATTTAACAG
BLASTHIT_11 1 -----AAAAAGATAACGGTTCAATTTAACGG
BLASTHIT_12 1 TGCTTACCACCAACCTGCTTATCAGCAA-----
BLASTHIT_13 1 -----TAAACGGTTAAATTTAACGG
BLASTHIT_14 1 -----AAAAATAACGGATAAATTTAACGA
BLASTHIT_15 1 -----GTCAAAAGATTACGGTTAAA--TTGACGG
BLASTHIT_16 1 -----ACCAACCTGCTTCTAACCAAGCT-----
BLASTHIT_17 1 -----GGTTAAATTTAACCG
BLASTHIT_18 1 -----CTTAACATCAAGCTATTTAAAGAAAAGCGGTTAAATTTTCATG
BLASTHIT_19 1 -----GTCAAAAGATTACGGTTAAA--TTGACGG
BLASTHIT_20 1 -----TAAACGGTTAAATTTAACGG
...
...
N=37

```

```

Fdpento_g4364_P 25 AAACCTAGAACGTCCA
query_g4364_1 61 AAACCTAGAACGTCCA
BLASTHIT_1 61 AAACCTAGAACGTCCA
BLASTHIT_2 61 AAACCTAGAACGTCCA
BLASTHIT_3 26 GGAAC
BLASTHIT_4 -----
BLASTHIT_5 -----
BLASTHIT_6 -----
BLASTHIT_7 27 AA-----
BLASTHIT_8 15 AAACCTAGA-----
BLASTHIT_9 -----
BLASTHIT_10 19 AACTACCGAGAACG--
BLASTHIT_11 26 AAA-----
BLASTHIT_12 -----
BLASTHIT_13 20 AAAC-----
BLASTHIT_14 25 AAAGCCAGA-----
BLASTHIT_15 28 AA-----
BLASTHIT_16 -----
BLASTHIT_17 16 AAACCTAG-----
BLASTHIT_18 44 GAAA-----
BLASTHIT_19 28 AA-----
BLASTHIT_20 20 AAAC-----
...
...
N=37

```

| BLAST HIT | Species                          | Query coverage [%] | Identity [%] | Accession          | redundant hits |
|-----------|----------------------------------|--------------------|--------------|--------------------|----------------|
| 1         | Pediococcus pentosaceus          | 100.0              | 99.0         | NC_008525.1        | 13 x           |
| 2         | Pediococcus pentosaceus          | 100.0              | 99.0         | NZ_JDVW01000004.1  | -              |
| 3         | Firmicutes bacterium             | 39.0               | 88.0         | NZ_QUDS01000002.1  | -              |
| 4         | Pseudovibrio hongkongensis       | 32.0               | 96.0         | NZ_LLWC01000022.1  | -              |
| 5         | Luteibacter rhizovicinus         | 38.0               | 90.0         | NZ_JPLB01000036.1  | 1 x            |
| 6         | Burkholderia multivorans         | 34.0               | 92.0         | NZ_PVGD01000058.1  | -              |
| 7         | Streptococcus gallolyticus       | 37.0               | 88.0         | NZ_FNFJ01000002.1  | 1 x            |
| 8         | Unicellular cyanobacterium       | 30.0               | 96.0         | NZ_NETF01000197.1  | -              |
| 9         | Staphylococcus gallinarum        | 33.0               | 92.0         | NZ_JXCF01000010.1  | 1 x            |
| 10        | Pyrenomonas methylaliphatogenes  | 40.0               | 86.0         | NZ_CBXV010000006.1 | -              |
| 11        | Maribacter sedimenticola         | 37.0               | 89.0         | NZ_FZNV01000002.1  | -              |
| 12        | Mannheimia haemolytica           | 37.0               | 89.0         | NC_021082.1        | 66 x           |
| 13        | Hungateiclostridium thermocellum | 30.0               | 96.0         | NC_009012.1        | 6 x            |
| 14        | Virgibacillus siamensis          | 43.0               | 85.0         | NZ_FUIH01000007.1  | -              |
| 15        | Streptococcus sanguinis          | 38.0               | 89.0         | NZ_GL890988.1      | -              |
| 16        | Bacillus sp.                     | 30.0               | 96.0         | NZ_QPJG01000005.1  | -              |
| 17        | Bacillus taeanensis              | 30.0               | 96.0         | NZ_QOCW01000025.1  | -              |
| 18        | Actinobacillus minor             | 61.0               | 78.0         | NZ_ACQL01000172.1  | -              |
| 19        | Streptococcus sp.                | 38.0               | 89.0         | NZ_LSJN01000035.1  | -              |
| 20        | Ruminiclostridium thermocellum   | 30.0               | 96.0         | NZ_CP016502.1      | 1 x            |



\*Anomalous sequences excluded from alignment

|                                                                                                                                                                                                                                                                                                                                                                                                                                                                                                                                                                                                                                                                                 |
|---------------------------------------------------------------------------------------------------------------------------------------------------------------------------------------------------------------------------------------------------------------------------------------------------------------------------------------------------------------------------------------------------------------------------------------------------------------------------------------------------------------------------------------------------------------------------------------------------------------------------------------------------------------------------------|
| <p>gi 522836524 ref NZ_KE352150.1 Enterococcus faecalis strain SB2C-2 Scaffold11<br/>gi 522836690 ref NZ_KE352316.1 Enterococcus faecalis strain SB2C-2 Scaffold89<br/>gi 522836680 ref NZ_KE352306.1 Enterococcus faecalis strain SB2C-2 Scaffold825</p> <p><b>Excluded because we suspected a wrong taxonomic classification.</b></p> <p>The classification was corrected on 2018-10-26.<br/>Enterococcus faecium SB2C-2 before 2018-10-26 (see Taxonomic-Update-Statistics)</p>                                                                                                                                                                                              |
| <p>gi 1120478950 ref NZ_FQZT01000002.1 Enterococcus faecium isolate Hp_76-17_S13_<br/>gi 1120479204 ref NZ_FQZT01000012.1 Enterococcus faecium isolate Hp_76-17_S13_</p> <p><b>Excluded because we suspect a wrong taxonomic classification.</b></p> <p>Taxonomy report of BLAST search (using default values, Nucleotide collection) of this sequence (NZ_FQZT01000002.1) shows best hits for Enterococcus faecalis and no hits for Enterococcus faecium.</p> <p>BLAST search (using default values, Nucleotide collection) of this sequence (NZ_FQZT01000012.1) shows best hits for Enterococcus faecalis and less similarity for Enterococcus faecium genome assemblies.</p> |
| <p>gi 1423449487 ref NZ_UEMU01000447.1 Escherichia coli strain KCRI-77E isolate RDK43_77E</p> <p><b>Excluded because we suspect a contamination.</b></p> <p>Taxonomy report of BLAST search (using default values, Nucleotide collection) of this sequence (NZ_UEMU01000447.1) shows only results for Enterococcus faecalis.</p>                                                                                                                                                                                                                                                                                                                                                |
| <p>gi 1129541523 ref NZ_CWML01000013.1 Listeria monocytogenes isolate LM52<br/>gi 1129541613 ref NZ_CWML01000029.1 Listeria monocytogenes isolate LM52</p> <p><b>Excluded because we suspect a wrong taxonomic classification.</b></p> <p>The corresponding assembly (GCA_001495195.1) shows only 79.251 % gapped identity to the closest related Listeria monocytogenes assembly.</p> <p>BLAST search (using default values, Nucleotide collection) of these sequences (NZ_CWML01000013.1, NZ_CWML01000029.1) shows high similarity with Enterococcus thailandicus and some similarity to other Enterococcus species but no hits for Listeria species.</p>                     |
| <p>gi 1005608163 ref NZ_FFHQ01000001.1 Listeria monocytogenes strain 2842STDY5753961</p> <p><b>Excluded because we suspect a wrong taxonomic classification.</b></p> <p>The corresponding assembly (GCA_900017475.1) shows only 87.1677 % gapped identity to the closest related Listeria monocytogenes assembly.</p> <p>Taxonomy report of BLAST search (using default values, Nucleotide collection) of the first 100000 bases of this sequence (NZ_FFHQ01000001.1) shows best hits for Enterococcus faecalis and no hits for Listeria species.</p>                                                                                                                           |
